# Supplementary material for: Synthesis of nitrogen-tethered 1,6-enynes through CuI/TFA catalysis
Source: Royal Society of Chemistry journal article supplement (doi:10.1039/d1qo01358k), 2021-12-03

## *Supporting Information for*

### **Synthesis of Nitrogen-Tethered 1,6-Enynes through CuI/TFA**

#### **Catalysis**

Leilei Cao,<sup>a†</sup>Liliang Huang,<sup>a†</sup>Xianjun Xu,<sup>b</sup>Erik V. Van der Eycken<sup>b,d</sup> and Huangdi  
Feng<sup>a,c\*</sup>

<sup>a</sup> College of Chemistry and Chemical Engineering, Shanghai University of  
Engineering Science, Shanghai 201620, China

<sup>b</sup> Laboratory for Organic & Microwave-Assisted Chemistry (LOMAC), Department  
of Chemistry, KU Leuven, Celestijnenlaan 200F, Leuven 3001, Belgium

<sup>c</sup> Shanghai Frontiers Science Research Center for Druggability of Cardiovascular  
noncoding RNA, Institute for Frontier Medical Technology, Shanghai University of  
Engineering Science, Shanghai, 201620, China

<sup>d</sup> Peoples' Friendship University of Russia (RUDN University), 6 Miklukho-Maklaya  
Street, Moscow 117198, Russia

†These authors equally contributed to this work

#### **Table of Content:**

|                                                                               |     |
|-------------------------------------------------------------------------------|-----|
| General Information .....                                                     | S2  |
| Experiment and Characterization Data .....                                    | S2  |
| Control Experiments .....                                                     | S22 |
| <sup>1</sup> H NMR, <sup>13</sup> C NMR and <sup>19</sup> F NMR spectra ..... | S27 |

## General Information

All commercially available reagents were used without purification unless otherwise noted. All reactions performed under air atmospheric pressure condition. Column chromatography was performed using silica gel (100-200 mesh). Visualization of the compounds was accomplished with UV light (254 nm) and iodine.  $^1\text{H}$  NMR and  $^{13}\text{C}$  NMR spectra were recorded in  $\text{CDCl}_3$  operating at 400 MHz and 100 MHz, respectively. Proton chemical shifts are reported relative to the residual proton signals of the deuterated solvent  $\text{CDCl}_3$  (7.29 ppm) or TMS. Carbon chemical shifts were internally referenced to the deuterated solvent signals in  $\text{CDCl}_3$  (77.10 ppm). Chemical shifts are reported in  $\delta$  (parts per million) values. Coupling constants  $J$  are reported in Hz. Proton coupling patterns were described as singlet (s), doublet (d), triplet (t), quartet (q), and multiple (m). High-resolution mass spectra were recorded on a liquid chromatograph mass spectrometer (LCMS-IT-TOF).

## Experiment and Characterization Data

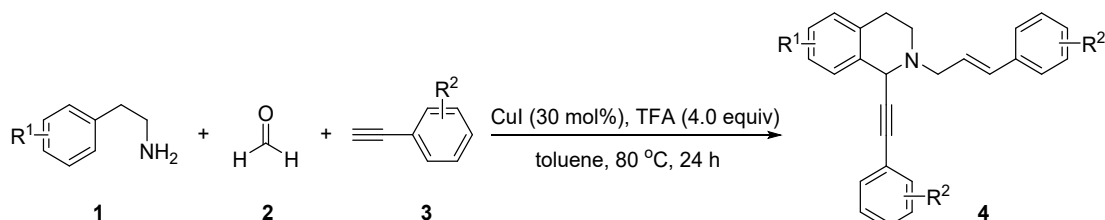

**General Procedure for Synthesis of Compounds 4:** In the air atmosphere, a 10 mL reaction tube was charged with the corresponding amine **1** (0.5 mmol), 37 w/w% solution **2** (1.5 mmol), alkyne **3** (1.0 mmol),  $\text{CuI}$  (30 mol%), TFA (4.0 equiv) and toluene (2.0 mL), then sealed. Subsequently, the reaction mixture was stirred at  $80\text{ }^\circ\text{C}$  for 24 h. Afterwards, the reaction mixture was quenched with saturated  $\text{Na}_2\text{CO}_3$  (5.0 mL), then  $\text{H}_2\text{O}$  (5.0 mL) was added to the mixture and extracted with  $\text{CH}_2\text{Cl}_2$  (10 mL  $\times$  3). Combined organic phase was washed with brine and dried over  $\text{Na}_2\text{SO}_4$ , and then filtered, the solvent was removed in a rotary evaporator. The residue was purified by flash chromatography (25–50% ethyl acetate in petroleum ether) to afford the desired products **4a–4z**.

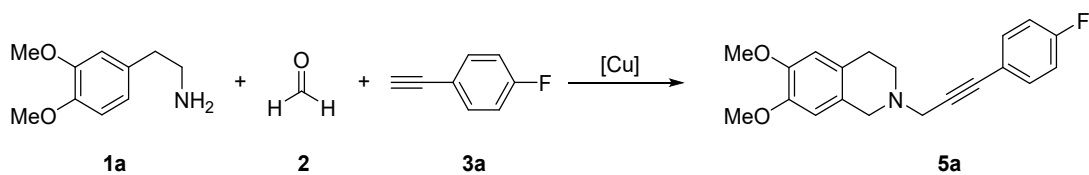

**Synthesis of Compounds 5a<sup>1</sup>:** In the air atmosphere, a 10 mL reaction tube was charged with the 2-(3,4-dimethoxyphenyl)ethan-1-amine **1a** (905 mg, 5 mmol), 37 w/w% formaldehyde solution **2** (891 mg, 11 mmol), 1-ethynyl-4-fluorobenzene **3a** (720 mg, 6 mmol), CuCl (30 mol%, 148 mg), TFA (570 mg, 1.0 equiv) and toluene (5.0 mL), then sealed. Subsequently, the reaction mixture was stirred at 80 °C for 24 h. Afterwards, the reaction system was directly purified by running silica gel flash column chromatography (25–50% ethyl acetate in petroleum ether) to afford the desired products **5a** (1.12 g, 70% yield).

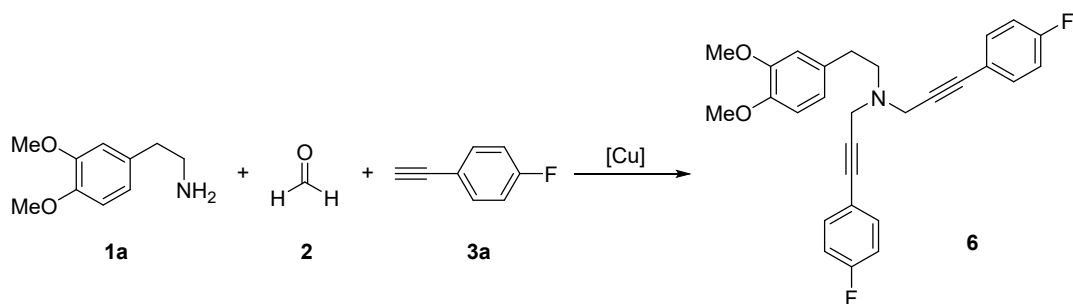

**Synthesis of Compounds 6<sup>1</sup>:** In the air atmosphere, a 10 mL reaction tube was charged with the 2-(3,4-dimethoxyphenyl)ethan-1-amine **1a** (905 mg, 5 mmol), 37 w/w% formaldehyde solution **2** (891 mg, 11 mmol), 1-ethynyl-4-fluorobenzene (1.2g, 10 mmol), CuI (20mol%, 190 mg), and toluene (5.0 mL), then sealed. Subsequently, the reaction mixture was stirred at 80 °C for 12 h. Afterwards, the reaction system was directly purified by running silica gel flash column chromatography (25–50% ethyl acetate in petroleum ether) to afford the desired products **6** (1.78 g, 80% yield).

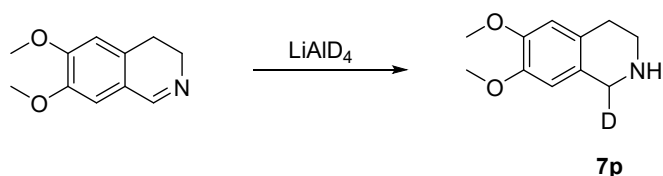

**Synthesis of Compounds 7p<sup>2</sup>:** 50 mL dry THF were added to 7 mmol LiAlD<sub>4</sub> (336 mg) followed by addition of 6,7-dimethoxy-3,4-dihydroisoquinoline (0.764 mL, 4

mmol) under nitrogen atmosphere. The mixture was refluxed for 40 h, cooled to 0 °C, and a 30% NaOH solution (100 mL) was added slowly. The aqueous phase was separated and extracted with THF (200 mL). The combined organic phase was dried using Na<sub>2</sub>SO<sub>4</sub> and concentrated under reduced pressure to **7p** as yellow oil.

***(E)-2-(3-(4-fluorophenyl)allyl)-1-((4-fluorophenyl)ethynyl)-6,7-dimethoxy-1,2,3,4-tetrahydroisoquinoline***

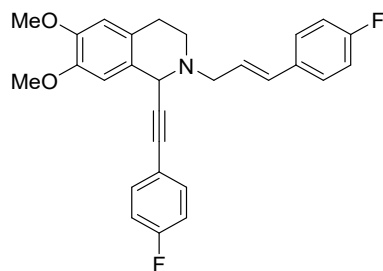

Purified by silica gel column chromatography (25–50% ethyl acetate in petroleum ether) afforded **4a** (144.6 mg, 65% yield) as yellow oil. <sup>1</sup>H NMR (400 MHz, Chloroform-d) δ 7.46–7.38 (m, 4H), 7.02 (d, *J* = 8.7 Hz, 4H), 6.81 (s, 1H), 6.65 (d, *J* = 4.0 Hz, 2H), 6.36–6.27 (m, 1H), 4.87 (s, 1H), 3.88 (s, 3H), 3.87 (s, 3H), 3.57 (d, *J* = 6.8 Hz, 2H), 3.14–2.88 (m, 3H), 2.78 (d, *J* = 14.4 Hz, 1H). <sup>13</sup>C NMR (100 MHz, Chloroform-d) δ 163.6 (d, *J*<sub>(C-F)</sub> = 9.5 Hz), 161.1 (d, *J*<sub>(C-F)</sub> = 7.0 Hz), 148.3, 147.5, 133.6 (d, *J*<sub>(C-F)</sub> = 8.2 Hz), 133.2 (d, *J*<sub>(C-F)</sub> = 3.3 Hz), 132.1, 127.9 (d, *J*<sub>(C-F)</sub> = 8.0 Hz), 127.1, 126.5 (d, *J*<sub>(C-F)</sub> = 2.4 Hz), 126.0, 119.3 (d, *J*<sub>(C-F)</sub> = 3.6 Hz), 115.6 (d, *J*<sub>(C-F)</sub> = 1.8 Hz), 115.4 (d, *J*<sub>(C-F)</sub> = 1.5 Hz), 111.4, 110.5, 87.1 (d, *J*<sub>(C-F)</sub> = 1.5 Hz), 85.7, 57.7, 56.0, 55.9, 54.2, 45.9, 28.5. <sup>19</sup>F NMR (376 MHz, Chloroform-d) δ -111.18 (s, 1F), -114.45 (s, 1F). HRMS *m/z* (ESI<sup>+</sup>): Calculated for C<sub>28</sub>H<sub>26</sub>F<sub>2</sub>NO<sub>2</sub> ([M+H]<sup>+</sup>): 446.1926, found 452.1935.

***(E)-2-(3-(4-fluorophenyl)allyl)-1-((4-fluorophenyl)ethynyl)-6-methoxy-1,2,3,4-tetrahydroisoquinoline***

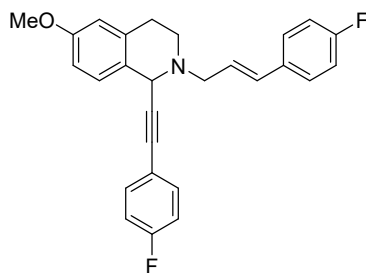

Purified by silica gel column chromatography (25–50% ethyl acetate in petroleum ether) afforded **4b** (118.2 mg, 57% yield) as yellow oil.  $^1\text{H NMR}$  (400 MHz, Chloroform-d)  $\delta$  7.47–7.38 (m, 4H), 7.25 (d,  $J = 8.5$  Hz, 1H), 7.08–6.99 (m, 4H), 6.81–6.79 (m, 1H), 6.71–6.65 (m, 2H), 6.36–6.29 (m, 1H), 4.90 (s, 1H), 3.81 (s, 3H), 3.66–3.52 (m, 2H), 3.14–3.00 (m, 2H), 2.95–2.80 (m, 2H).  $^{13}\text{C NMR}$  (100 MHz, Chloroform-d)  $\delta$  163.6 (d,  $J_{(C-F)} = 7.0$  Hz), 161.1 (d,  $J_{(C-F)} = 4.7$  Hz), 158.6, 135.1, 133.6 (d,  $J_{(C-F)} = 8.2$  Hz), 133.2 (d,  $J_{(C-F)} = 3.3$  Hz), 132.1, 128.8, 127.9 (d,  $J_{(C-F)} = 8.0$  Hz), 127.6, 126.4 (d,  $J_{(C-F)} = 2.2$  Hz), 119.3 (d,  $J_{(C-F)} = 3.7$  Hz), 115.6 (d,  $J_{(C-F)} = 2.3$  Hz), 115.4 (d,  $J_{(C-F)} = 2.8$  Hz), 113.4, 112.5, 87.2 (d,  $J_{(C-F)} = 1.5$  Hz), 85.6, 57.7, 55.2, 54.2, 45.7, 29.1.  $^{19}\text{F NMR}$  (376 MHz, Chloroform-d)  $\delta$  -111.21 (s, 1F), -114.48 (s, 1F). **HRMS**  $m/z$  (ESI $^+$ ): Calculated for  $\text{C}_{27}\text{H}_{24}\text{F}_2\text{NO}$  ( $[\text{M}+\text{H}]^+$ ): 416.1820, found 416.1826.

***(E)-6-(3-(4-fluorophenyl)allyl)-5-((4-fluorophenyl)ethynyl)-5,6,7,8-tetrahydro-[1,3]dioxolo[4,5-g]isoquinoline***

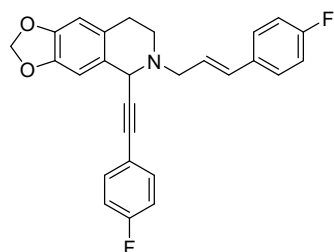

Purified by silica gel column chromatography (25–50% ethyl acetate in petroleum ether) afforded **4c** (128.7 mg, 60% yield) as yellow oil.  $^1\text{H NMR}$  (400 MHz, Chloroform-d)  $\delta$  7.46–7.42 (m, 2H), 7.41–7.37 (m, 2H), 7.06–6.99 (m, 4H), 6.77 (s, 1H), 6.65 (d,  $J = 15.8$  Hz, 1H), 6.61 (s, 1H), 6.33–6.26 (m, 1H), 5.96–5.91 (m, 2H), 4.82 (s, 1H), 3.60–3.49 (m, 2H), 3.09–3.02 (m, 1H), 3.01–2.94 (m, 1H), 2.92–2.86 (m, 1H), 2.79–2.72 (m, 1H).  $^{13}\text{C NMR}$  (100 MHz, Chloroform-d)  $\delta$  163.6 (d,  $J_{(C-F)} = 10.3$

Hz), 161.2 (d,  $J_{(C-F)} = 7.8$  Hz), 146.9, 146.0, 133.6 (d,  $J_{(C-F)} = 8.4$  Hz), 133.1 (d,  $J_{(C-F)} = 3.3$  Hz), 132.3, 127.9 (d,  $J_{(C-F)} = 8.0$  Hz), 127.1, 126.1, 119.1 (d,  $J_{(C-F)} = 3.4$  Hz), 115.5 (d,  $J_{(C-F)} = 21.9$  Hz), 108.5, 107.5, 100.9, 86.7, 85.8, 57.6, 54.5, 45.7, 28.8.  **$^{19}\text{F}$  NMR** (376 MHz, Chloroform-d)  $\delta$  -111.17 (s, 1F), -114.46 (s, 1F). **HRMS** m/z (ESI<sup>+</sup>): Calculated for C<sub>27</sub>H<sub>21</sub>F<sub>2</sub>NO<sub>2</sub>Na ([M+Na]<sup>+</sup>):452.1433, found 452.1439.

***(E)-7-(3-(4-fluorophenyl)allyl)-6-((4-fluorophenyl)ethynyl)-2,3,6,7,8,9-hexahydro-[1,4]dioxino[2,3-g]isoquinoline***

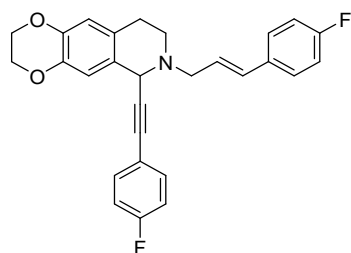

Purified by silica gel column chromatography (25–50% ethyl acetate in petroleum ether) afforded **4d** (155.0 mg, 70% yield) as yellow oil.  **$^1\text{H}$  NMR** (400 MHz, Chloroform-d)  $\delta$  7.39–7.29 (m, 4H), 6.95 (q,  $J = 9.0$  Hz, 4H), 6.75 (s, 1H), 6.56 (d,  $J = 12.9$  Hz, 2H), 6.26–6.17 (m, 1H), 4.74 (s, 1H), 4.18 (s, 4H), 3.54–3.38 (m, 2H), 3.01–2.96 (m, 1H), 2.92–2.83 (m, 1H), 2.79 (d,  $J = 13.9$  Hz, 1H), 2.68 (d,  $J = 16.5$  Hz, 1H).  **$^{13}\text{C}$  NMR** (100 MHz, Chloroform-d)  $\delta$  163.6 (d,  $J_{(C-F)} = 8.2$  Hz), 161.1 (d,  $J_{(C-F)} = 5.7$  Hz), 142.8, 141.9, 133.6 (d,  $J_{(C-F)} = 8.2$  Hz), 133.2 (d,  $J_{(C-F)} = 3.3$  Hz), 132.1, 128.1, 127.9 (d,  $J_{(C-F)} = 8.0$  Hz), 126.8, 126.3, 119.2 (d,  $J_{(C-F)} = 3.5$  Hz), 116.8, 115.9, 115.6 (d,  $J_{(C-F)} = 2.9$  Hz), 115.4 (d,  $J_{(C-F)} = 3.3$  Hz), 87.0, 85.6, 64.4, 64.4, 57.6, 54.1, 45.8, 28.1.  **$^{19}\text{F}$  NMR** (376 MHz, Chloroform-d)  $\delta$  -111.33 (s, 1F), -114.56 (s, 1F). **HRMS** m/z (ESI<sup>+</sup>): Calculated for C<sub>28</sub>H<sub>24</sub>F<sub>2</sub>NO<sub>2</sub> ([M+H]<sup>+</sup>): 444.1770, found 444.1771.

***(E)-6,7-diethoxy-2-(3-(4-fluorophenyl)allyl)-1-((4-fluorophenyl)ethynyl)-1,2,3,4-tetrahydroisoquinoline***

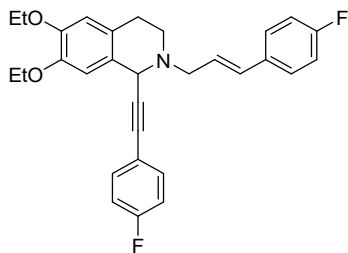

Purified by silica gel column chromatography (25–50% ethyl acetate in petroleum ether) afforded **4e** (125.3 mg, 53% yield) as yellow oil.  $^1\text{H NMR}$  (400 MHz, Chloroform- $d$ )  $\delta$  7.45–7.38 (m, 4H), 7.03 (q,  $J$  = 8.6 Hz, 4H), 6.82 (s, 1H), 6.67 (d,  $J$  = 14.8 Hz, 2H), 6.37–6.27 (m, 1H), 4.87 (s, 1H), 4.13–4.03 (m, 4H), 3.59–3.55 (m, 2H), 3.13–3.06 (m, 1H), 3.05–2.96 (m, 1H), 2.93 (d,  $J$  = 13.3 Hz, 1H), 2.77 (d,  $J$  = 14.0 Hz, 1H), 1.48–1.45 (m, 3H), 1.45–1.42 (m, 3H).  $^{13}\text{C NMR}$  (100 MHz, Chloroform- $d$ )  $\delta$  163.6 (d,  $J_{(C-F)}$  = 8.4 Hz), 161.1 (d,  $J_{(C-F)}$  = 6.1 Hz), 148.2, 147.1, 133.6 (d,  $J_{(C-F)}$  = 8.3 Hz), 133.1 (d,  $J_{(C-F)}$  = 3.2 Hz), 132.3, 127.9 (d,  $J_{(C-F)}$  = 8.0 Hz), 127.0, 126.2 (d,  $J_{(C-F)}$  = 2.3 Hz), 126.0, 119.2 (d,  $J_{(C-F)}$  = 3.4 Hz), 115.5 (d,  $J_{(C-F)}$  = 22.3 Hz), 113.6, 112.8, 87.0, 85.7, 64.7, 64.5, 57.6, 54.1, 45.8, 28.3, 14.9, 14.8.  $^{19}\text{F NMR}$  (376 MHz, Chloroform- $d$ )  $\delta$  -111.30 (s, 1F), -114.53 (s, 1F). **HRMS**  $m/z$  (ESI $^+$ ): Calculated for  $\text{C}_{30}\text{H}_{30}\text{F}_2\text{NO}_2$  ( $[\text{M}+\text{H}]^+$ ): 474.2239, found 474.2241.

**(E)-2-(3-(4-fluorophenyl)allyl)-1-((4-fluorophenyl)ethynyl)-6-methoxy-7-methyl-1,2,3,4-tetrahydroisoquinoline**

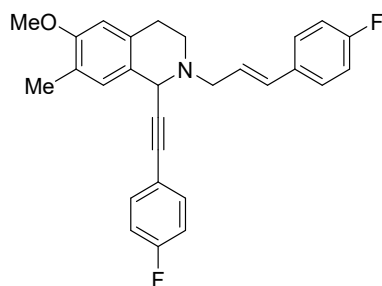

Purified by silica gel column chromatography (25–50% ethyl acetate in petroleum ether) afforded **4f** (111.5 mg, 52% yield) as yellow oil.  $^1\text{H NMR}$  (400 MHz, Chloroform- $d$ )  $\delta$  7.47–7.39 (m, 4H), 7.10–6.99 (m, 5H), 6.71–6.59 (m, 2H), 6.37–6.28 (m, 1H), 4.87 (s, 1H), 3.84 (s, 3H), 3.57 (d,  $J$  = 6.8 Hz, 2H), 3.14–3.07 (m, 1H), 3.06–3.01 (m, 1H), 2.95–2.89 (m, 1H), 2.88–2.78 (m, 1H), 2.23 (s, 3H).  $^{13}\text{C NMR}$  (100 MHz, Chloroform- $d$ )  $\delta$  163.6 (d,  $J_{(C-F)}$  = 5.4 Hz), 161.1 (d,  $J_{(C-F)}$  = 3.1 Hz), 156.9,

133.6 (d,  $J_{(C-F)} = 8.3$  Hz), 133.3 (d,  $J_{(C-F)} = 3.4$  Hz), 132.1 (d,  $J_{(C-F)} = 18.0$  Hz), 129.7, 127.9 (d,  $J_{(C-F)} = 8.0$  Hz), 126.8, 126.6 (d,  $J_{(C-F)} = 2.2$  Hz), 124.7, 119.4 (d,  $J_{(C-F)} = 3.4$  Hz), 115.6 (d,  $J_{(C-F)} = 4.0$  Hz), 115.4 (d,  $J_{(C-F)} = 4.4$  Hz), 109.9, 87.4, 85.4, 57.7, 55.3, 54.0, 45.8, 29.0, 15.9.  **$^{19}\text{F}$  NMR** (376 MHz, Chloroform-d)  $\delta$  -111.47 (s, 1F), -114.63 (s, 1F). **HRMS**  $m/z$  (ESI<sup>+</sup>): Calculated for C<sub>28</sub>H<sub>26</sub>F<sub>2</sub>NO ([M+H]<sup>+</sup>): 430.1977, found 430.1983.

***(E)*-6-(3-(4-fluorophenyl)allyl)-7-((4-fluorophenyl)ethynyl)-4,5,6,7-tetrahydrothieno[2,3-c]pyridine**

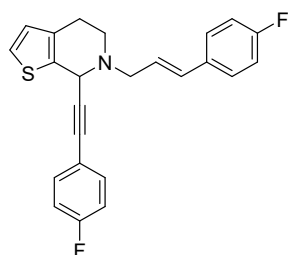

Purified by silica gel column chromatography (25–50% ethyl acetate in petroleum ether) afforded **4g** (78.2 mg, 40% yield) as light yellow oil.  **$^1\text{H}$  NMR** (400 MHz, Chloroform-d)  $\delta$  7.49–7.43 (m, 2H), 7.42–7.35 (m, 2H), 7.20 (d,  $J = 5.1$  Hz, 1H), 7.09–6.98 (m, 4H), 6.81 (d,  $J = 5.1$  Hz, 1H), 6.65 (d,  $J = 15.8$  Hz, 1H), 6.36–6.24 (m, 1H), 4.99 (s, 1H), 3.69–3.62 (m, 1H), 3.57–3.49 (m, 1H), 3.20–3.10 (m, 1H), 2.95–2.70 (m, 3H).  **$^{13}\text{C}$  NMR** (100 MHz, Chloroform-d)  $\delta$  163.7 (d,  $J_{(C-F)} = 18.4$  Hz), 161.2 (d,  $J_{(C-F)} = 15.8$  Hz), 134.0 (d,  $J_{(C-F)} = 11.4$  Hz), 133.7 (d,  $J_{(C-F)} = 8.3$  Hz), 133.1 (d,  $J_{(C-F)} = 3.1$  Hz), 132.3, 127.9 (d,  $J_{(C-F)} = 8.0$  Hz), 126.8, 126.3 (d,  $J_{(C-F)} = 2.3$  Hz), 123.8, 119.0 (d,  $J_{(C-F)} = 3.5$  Hz), 115.6 (d,  $J_{(C-F)} = 1.6$  Hz), 115.4, 86.4, 85.6, 57.2, 51.7, 46.2, 25.7.  **$^{19}\text{F}$  NMR** (376 MHz, Chloroform-d)  $\delta$  -110.94 (s, 1F), -114.42 (s, 1F). **HRMS**  $m/z$  (ESI<sup>+</sup>): Calculated for C<sub>24</sub>H<sub>20</sub>F<sub>2</sub>NS ([M+H]<sup>+</sup>): 392.1279, found 392.1286.

***(E)*-2-(3-(4-fluorophenyl)allyl)-1-((4-fluorophenyl)ethynyl)-1,2,3,4-tetrahydroisoquinoline**



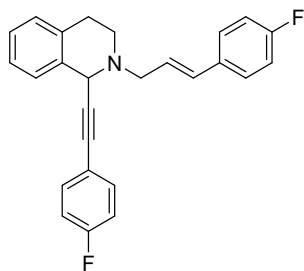

Purified by silica gel column chromatography (25–50% ethyl acetate in petroleum ether) afforded **4h** (100 mg, 52% yield) as light yellow oil. **<sup>1</sup>H NMR** (400 MHz, Chloroform-d)  $\delta$  7.47–7.38 (m, 4H), 7.35–7.31 (m, 1H), 7.25–7.20 (m, 2H), 7.19–7.16 (m, 1H), 7.10–6.98 (m, 4H), 6.68 (d,  $J$  = 15.9 Hz, 1H), 6.37–6.26 (m, 1H), 4.95 (s, 1H), 3.58 (d,  $J$  = 8.2 Hz, 2H), 3.19–3.04 (m, 2H), 2.98–2.82 (m, 2H). **<sup>13</sup>C NMR** (100 MHz, Chloroform-d)  $\delta$  163.6 (d,  $J_{(C-F)}$  = 9.0 Hz), 161.2 (d,  $J_{(C-F)}$  = 6.6 Hz), 135.1, 133.8, 133.7, 133.6, 133.2 (d,  $J_{(C-F)}$  = 3.3 Hz), 132.2, 129.0, 127.9 (d,  $J_{(C-F)}$  = 7.9 Hz), 127.8, 127.1, 126.3 (d,  $J_{(C-F)}$  = 2.4 Hz), 126.0, 119.2 (d,  $J_{(C-F)}$  = 3.6 Hz), 115.6 (d,  $J_{(C-F)}$  = 1.2 Hz), 115.4 (d,  $J_{(C-F)}$  = 1.7 Hz), 86.9, 85.9, 57.6, 54.6, 45.6, 28.7. **<sup>19</sup>F NMR** (376 MHz, Chloroform-d)  $\delta$  -111.21 (s, 1F), -114.48 (s, 1F). **HRMS**  $m/z$  (ESI<sup>+</sup>): Calculated for C<sub>26</sub>H<sub>22</sub>F<sub>2</sub>N([M+H]<sup>+</sup>): 386.1715, found 386.1715.

***(E)-2-(3-(3-fluorophenyl)allyl)-1-((3-fluorophenyl)ethynyl)-6,7-dimethoxy-1,2,3,4-tetrahydroisoquinoline***

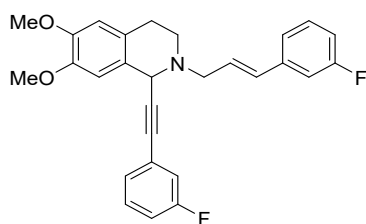

Purified by silica gel column chromatography (25–50% ethyl acetate in petroleum ether) afforded **4k** (140.1 mg, 63% yield) as yellow oil. **<sup>1</sup>H NMR** (400 MHz, Chloroform-d)  $\delta$  7.34–7.27 (m, 2H), 7.26–7.20 (m, 2H), 7.18–7.12 (m, 2H), 7.07–6.93 (m, 2H), 6.79 (s, 1H), 6.71–6.63 (m, 2H), 6.45–6.37 (m, 1H), 4.87 (s, 1H), 3.89 (s, 3H), 3.88 (s, 3H), 3.58 (d,  $J$  = 6.9 Hz, 2H), 3.14–2.87 (m, 3H), 2.78 (d,  $J$  = 16.3 Hz, 1H). **<sup>13</sup>C NMR** (100 MHz, Chloroform-d)  $\delta$  164.0 (d,  $J_{(C-F)}$  = 79.9 Hz), 161.5 (d,  $J_{(C-F)}$  = 81.0 Hz), 148.4, 147.5, 139.3 (d,  $J_{(C-F)}$  = 7.7 Hz), 132.3 (d,  $J_{(C-F)}$  = 2.5 Hz), 130.1 (d,

$J_{(C-F)} = 8.4$  Hz), 129.9 (d,  $J_{(C-F)} = 8.7$  Hz), 128.1, 127.7 (d,  $J_{(C-F)} = 3.0$  Hz), 126.7, 125.9, 124.9 (d,  $J_{(C-F)} = 9.5$  Hz), 122.3 (d,  $J_{(C-F)} = 2.7$  Hz), 118.6 (d,  $J_{(C-F)} = 22.7$  Hz), 115.5 (d,  $J_{(C-F)} = 21.1$  Hz), 114.4 (d,  $J_{(C-F)} = 21.3$  Hz), 112.9 (d,  $J_{(C-F)} = 21.7$  Hz), 111.4, 110.4, 88.3, 85.7 (d,  $J_{(C-F)} = 3.4$  Hz), 57.6, 56.0, 55.9, 54.1, 45.9, 28.4.  **$^{19}\text{F}$  NMR** (376 MHz, Chloroform-d)  $\delta$  -113.01 (s, 1F), -113.41 (s, 1F). **HRMS**  $m/z$  (ESI<sup>+</sup>): Calculated for C<sub>28</sub>H<sub>26</sub>F<sub>2</sub>NO<sub>2</sub> ([M+H]<sup>+</sup>): 446.1926, found 446.1931.

***(E)-2-(3-(2-fluorophenyl)allyl)-1-((2-fluorophenyl)ethynyl)-6,7-dimethoxy-1,2,3,4-tetrahydroisoquinoline***

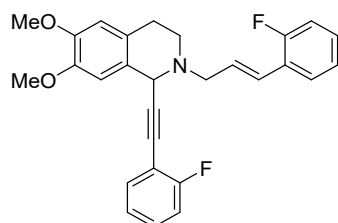

Purified by silica gel column chromatography (25–50% ethyl acetate in petroleum ether) afforded **4l** (142.4 mg, 64% yield) as yellow oil.  **$^1\text{H}$  NMR** (400 MHz, Chloroform-d)  $\delta$  7.57–7.51 (m, 1H), 7.45 (t,  $J = 8.2$  Hz, 1H), 7.34–7.19 (m, 2H), 7.16–7.03 (m, 4H), 6.92 (d,  $J = 16.0$  Hz, 1H), 6.85 (s, 1H), 6.64 (s, 1H), 6.56–6.44 (m, 1H), 4.93 (s, 1H), 3.89 (s, 3H), 3.88 (s, 3H), 3.63 (d,  $J = 7.0$  Hz, 2H), 3.18–2.87 (m, 3H), 2.79 (d,  $J = 16.5$  Hz, 1H).  **$^{13}\text{C}$  NMR** (100 MHz, Chloroform-d)  $\delta$  162.9 (d,  $J_{(C-F)} = 251.1$  Hz), 160.2 (d,  $J_{(C-F)} = 249.3$  Hz), 148.3, 147.5, 133.5, 129.8 (d,  $J_{(C-F)} = 7.8$  Hz), 129.1 (d,  $J_{(C-F)} = 4.6$  Hz), 128.8 (d,  $J_{(C-F)} = 8.3$  Hz), 127.5 (d,  $J_{(C-F)} = 3.8$  Hz), 126.7, 125.9 (d,  $J_{(C-F)} = 7.6$  Hz), 124.8 (d,  $J_{(C-F)} = 12.1$  Hz), 124.1 (d,  $J_{(C-F)} = 3.6$  Hz), 123.8 (d,  $J_{(C-F)} = 3.7$  Hz), 115.9, 115.6 (d,  $J_{(C-F)} = 10.3$  Hz), 115.3, 111.7 (d,  $J_{(C-F)} = 15.8$  Hz), 111.4, 110.5, 92.7 (d,  $J_{(C-F)} = 3.6$  Hz), 80.1, 58.0, 56.0, 55.9, 54.3, 46.0, 28.5.  **$^{19}\text{F}$  NMR** (376 MHz, Chloroform-d)  $\delta$  -109.79 (s, 1F), -118.07 (s, 1F). **HRMS**  $m/z$  (ESI<sup>+</sup>): Calculated for C<sub>28</sub>H<sub>26</sub>F<sub>2</sub>NO<sub>2</sub> ([M+H]<sup>+</sup>): 446.1926, found 446.1933.

***(E)-2-(3-(4-chlorophenyl)allyl)-1-((4-chlorophenyl)ethynyl)-6,7-dimethoxy-1,2,3,4-tetrahydroisoquinoline***

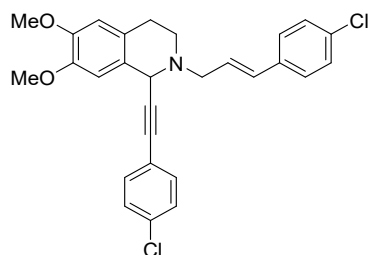

Purified by silica gel column chromatography (25–50% ethyl acetate in petroleum ether) afforded **4m** (119.5 mg, 50% yield) as yellow oil.  $^1\text{H NMR}$  (400 MHz, Chloroform- $d$ )  $\delta$  7.40–7.34 (m, 4H), 7.33–7.28 (m, 4H), 6.78 (s, 1H), 6.65 (d,  $J$  = 12.5 Hz, 2H), 6.41–6.32 (m, 1H), 4.85 (s, 1H), 3.88 (s, 6H), 3.55 (d,  $J$  = 6.8 Hz, 2H), 3.11–2.87 (m, 3H), 2.82–2.73 (m, 1H).  $^{13}\text{C NMR}$  (100 MHz, Chloroform- $d$ )  $\delta$  148.4, 147.5, 135.4, 134.2, 133.2, 133.0, 132.2, 128.8, 128.6, 127.6, 127.3, 126.7, 125.9, 121.6, 111.4, 110.4, 88.3, 85.7, 57.6, 56.0, 55.9, 54.1, 45.9, 28.4. **HRMS**  $m/z$  (ESI $^+$ ): Calculated for  $\text{C}_{28}\text{H}_{26}\text{Cl}_2\text{NO}_2$  ( $[\text{M}+\text{H}]^+$ ): 478.1335, found 478.1336.

***(E)-2-(3-(3-chlorophenyl)allyl)-1-((3-chlorophenyl)ethynyl)-6,7-dimethoxy-1,2,3,4-tetrahydroisoquinoline***

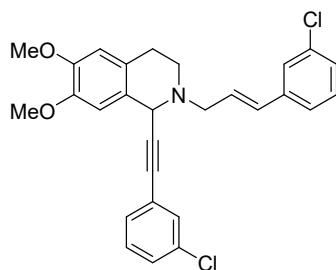

Purified by silica gel column chromatography (25–50% ethyl acetate in petroleum ether) afforded **4n** (104.9 mg, 44% yield) as light yellow oil.  $^1\text{H NMR}$  (400 MHz, Chloroform- $d$ )  $\delta$  7.44 (d,  $J$  = 9.8 Hz, 2H), 7.31 (d,  $J$  = 10.9 Hz, 3H), 7.26 (d,  $J$  = 7.8 Hz, 3H), 6.78 (s, 1H), 6.69–6.61 (m, 2H), 6.46–6.36 (m, 1H), 4.85 (s, 1H), 3.89 (s, 3H), 3.88 (s, 3H), 3.57 (d,  $J$  = 8.1 Hz, 2H), 3.12–2.88 (m, 3H), 2.78 (d,  $J$  = 13.0 Hz, 1H).  $^{13}\text{C NMR}$  (100 MHz, Chloroform- $d$ )  $\delta$  148.4, 147.5, 138.8, 134.6, 134.1, 132.0, 131.7, 129.9, 129.8, 129.5, 128.4, 128.2, 127.5, 126.7, 126.4, 125.9, 124.8, 124.6, 111.4, 110.4, 88.6, 85.5, 57.6, 56.0, 55.9, 54.1, 45.9, 28.4. **HRMS**  $m/z$  (ESI $^+$ ): Calculated for  $\text{C}_{28}\text{H}_{26}\text{Cl}_2\text{NO}_2$  ( $[\text{M}+\text{H}]^+$ ): 478.1335, found 478.1336.

***(E)*-2-(3-(2-chlorophenyl)allyl)-1-((2-chlorophenyl)ethynyl)-6,7-dimethoxy-1,2,3,4-tetrahydroisoquinoline**

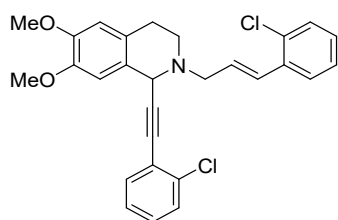

Purified by silica gel column chromatography (25–50% ethyl acetate in petroleum ether) afforded **4o** (140.4 mg, 59% yield) as yellow oil. <sup>1</sup>H NMR (400 MHz, Chloroform-d) δ 7.63–7.61 (m, 1H), 7.50–7.48 (m, 1H), 7.42–7.37 (m, 2H), 7.27–7.21 (m, 3H), 7.21–7.13 (m, 2H), 6.86 (s, 1H), 6.64 (s, 1H), 6.44–6.37 (m, 1H), 4.96 (s, 1H), 3.89 (s, 3H), 3.88 (s, 3H), 3.73–3.66 (m, 2H), 3.22–3.12 (m, 1H), 3.07–3.01 (m, 1H), 2.99–2.92 (m, 1H), 2.84–2.75 (m, 1H). <sup>13</sup>C NMR (100MHz, Chloroform-d) δ 148.3, 147.5, 136.0, 135.1, 133.4, 133.0, 129.7, 129.6, 129.5, 129.2, 129.1, 128.5, 126.9, 126.9, 126.7, 126.4, 126.0, 123.1, 111.4, 110.5, 92.8, 83.7, 57.7, 56.0, 55.9, 54.4, 46.0, 28.5. HRMS m/z (ESI<sup>+</sup>): Calculated for C<sub>28</sub>H<sub>26</sub>Cl<sub>2</sub>NO<sub>2</sub> ([M+H]<sup>+</sup>): 478.1335, found 478.1336.

***(E)*-2-(3-(4-bromophenyl)allyl)-1-((4-bromophenyl)ethynyl)-6,7-dimethoxy-1,2,3,4-tetrahydroisoquinoline**

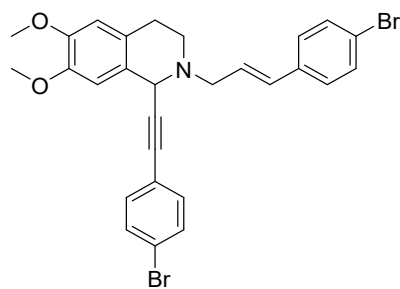

Purified by silica gel column chromatography (25–50% ethyl acetate in petroleum ether) afforded **4p** (163.8 mg, 58% yield) as yellow oil. <sup>1</sup>H NMR (400 MHz, Chloroform-d) δ 7.48–7.44 (m, 4H), 7.31 (d, *J* = 7.8 Hz, 4H), 6.78 (s, 1H), 6.64 (t, *J* = 7.9 Hz, 2H), 6.43–6.34 (m, 1H), 4.85 (s, 1H), 3.88 (s, 6H), 3.55 (d, *J* = 6.8 Hz, 2H), 3.12–2.88 (m, 3H), 2.77 (d, *J* = 14.1 Hz, 1H). <sup>13</sup>C NMR (100 MHz, Chloroform-d) δ 148.4, 147.5, 135.9, 133.2, 132.2, 131.7, 131.5, 127.9, 127.5, 126.7, 125.9, 122.3,

122.1, 121.4, 111.4, 110.4, 88.5, 85.8, 57.6, 56.0, 55.9, 54.2, 45.9, 28.4. **HRMS**  $m/z$  (ESI<sup>+</sup>): Calculated for C<sub>28</sub>H<sub>26</sub>Br<sub>2</sub>NO<sub>2</sub> ([M+H]<sup>+</sup>): 566.0325, found 566.0325.

***(E)-2-(3-(3-bromophenyl)allyl)-1-((3-bromophenyl)ethynyl)-6,7-dimethoxy-1,2,3,4-tetrahydroisoquinoline***

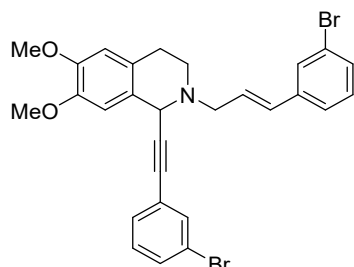

Purified by silica gel column chromatography (25–50% ethyl acetate in petroleum ether) afforded **4q** (157.9 mg, 56% yield) as yellow oil. **<sup>1</sup>H NMR** (400 MHz, Chloroform-d)  $\delta$  7.59 (d,  $J$  = 7.3 Hz, 2H), 7.46 (d,  $J$  = 7.4 Hz, 1H), 7.42–7.33 (m, 3H), 7.26–7.17 (m, 2H), 6.77 (s, 1H), 6.67–6.60 (m, 2H), 6.45–6.35 (m, 1H), 4.85 (s, 1H), 3.89 (s, 3H), 3.88 (s, 3H), 3.56 (d,  $J$  = 6.5 Hz, 2H), 3.11–2.88 (m, 3H), 2.77 (d,  $J$  = 14.8 Hz, 1H). **<sup>13</sup>C NMR** (100 MHz, Chloroform-d)  $\delta$  148.4, 147.5, 139.1, 134.5, 131.9, 131.3, 130.4, 130.3, 130.1, 129.7, 129.4, 128.3, 126.6, 125.9, 125.1, 125.0, 122.8, 122.1, 111.4, 110.4, 88.7, 85.4, 57.6, 56.0, 55.9, 54.1, 45.9, 28.4. **HRMS**  $m/z$  (ESI<sup>+</sup>): Calculated for C<sub>28</sub>H<sub>26</sub>Br<sub>2</sub>NO<sub>2</sub> ([M+H]<sup>+</sup>): 566.0325, found 566.0325.

***(E)-4-((2-(3-(4-cyanophenyl)allyl)-6,7-dimethoxy-1,2,3,4-tetrahydroisoquinolin-1-yl)ethynyl)benzonitrile***

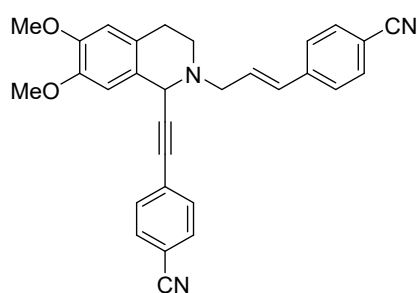

Purified by silica gel column chromatography (25–50% ethyl acetate in petroleum ether) afforded **4r** (84.9mg, 37 w/w% yield) as yellow oil. **<sup>1</sup>H NMR** (400 MHz, Chloroform-d)  $\delta$  7.62 (t,  $J$  = 6.8 Hz, 4H), 7.56–7.47 (m, 4H), 6.76 (s, 1H), 6.71 (d,  $J$  = 15.9 Hz, 1H), 6.65 (s, 1H), 6.58–6.46 (m, 1H), 4.87 (s, 1H), 3.88 (s, 6H), 3.59 (d,

$J=6.5$  Hz, 2H), 3.12–2.90 (m, 3H), 2.80 (s, 1H).  $^{13}\text{C}$  NMR (100 MHz, Chloroform- $d$ )  $\delta$  148.6, 147.6, 141.3, 132.5, 132.3, 132.0, 131.6, 130.8, 127.9, 126.9, 126.0, 125.9, 118.9, 118.4, 111.6, 111.5, 110.9, 110.3, 92.0, 85.5, 57.5, 56.1, 55.9, 54.3, 46.0, 28.3. HRMS  $m/z$  (ESI $^+$ ): Calculated for  $\text{C}_{30}\text{H}_{26}\text{N}_3\text{O}_2$  ( $[\text{M}+\text{H}]^+$ ): 460.2020, found 460.2020.

**2-cinnamyl-6,7-dimethoxy-1-(phenylethynyl)-1,2,3,4-tetrahydroisoquinoline**

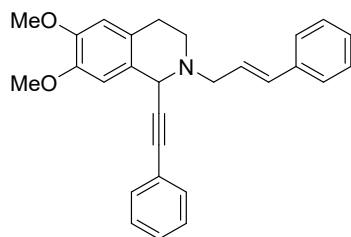

Purified by silica gel column chromatography (25–50% ethyl acetate in petroleum ether) afforded **4s** (77.7 mg, 38% yield) as light yellow oil.  $^1\text{H}$  NMR (400 MHz, Chloroform- $d$ )  $\delta$  7.50–7.44 (m, 4H), 7.40–7.32 (m, 5H), 7.28 (t,  $J = 7.3$  Hz, 1H), 6.82 (s, 1H), 6.73 (d,  $J = 15.9$  Hz, 1H), 6.64 (s, 1H), 6.46–6.37 (m, 1H), 4.89 (s, 1H), 3.89 (s, 3H), 3.88 (s, 3H), 3.60 (d,  $J = 5.6$  Hz, 2H), 3.18–2.86 (m, 3H), 2.82–2.74 (m, 1H).  $^{13}\text{C}$  NMR (100 MHz, Chloroform- $d$ )  $\delta$  148.3, 147.5, 137.0, 133.4, 131.8, 128.6, 128.3, 128.1, 127.6, 127.2, 126.7, 126.4, 126.0, 123.2, 111.4, 110.5, 87.4, 86.8, 57.8, 56.0, 55.9, 54.2, 45.9, 28.5. HRMS  $m/z$  (ESI $^+$ ): Calculated for  $\text{C}_{28}\text{H}_{28}\text{NO}_2$  ( $[\text{M}+\text{H}]^+$ ): 410.2115, found 410.2112.

**(E)-6,7-dimethoxy-2-(3-(4-(trifluoromethyl)phenyl)allyl)-1-(4-(trifluoromethyl)phenyl)ethynyl)-1,2,3,4-tetrahydroisoquinoline**

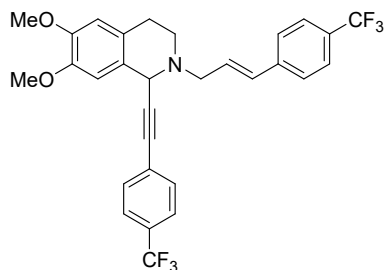

Purified by silica gel column chromatography (25–50% ethyl acetate in petroleum ether) afforded **4t** (109.0 mg, 40% yield) as yellow oil.  $^1\text{H}$  NMR (400 MHz, Chloroform- $d$ )  $\delta$  7.63–7.52 (m, 8H), 6.80 (s, 1H), 6.75 (d,  $J = 15.9$  Hz, 1H), 6.66 (s, 1H), 6.51 (d,  $J = 15.9$  Hz, 1H), 4.90 (s, 1H), 3.89 (s, 6H), 3.61 (d,  $J = 7.1$  Hz, 2H),

3.15–2.91 (m, 3H), 2.80 (d,  $J=16.2$  Hz, 1H).  $^{13}\text{C}$  NMR (100 MHz, Chloroform-d)  $\delta$  148.5, 147.6, 140.3, 132.2, 132.0, 130.1 (q,  $J_{(C-F)} = 3.7$  Hz), 129.2 (q,  $J_{(C-F)} = 19.0$  Hz), 128.2, 128.0, 126.8, 126.6, 126.2, 125.8, 125.6 (q,  $J_{(C-F)} = 4.0$  Hz), 125.2 (q,  $J_{(C-F)} = 3.7$  Hz), 111.4, 110.4, 89.7, 85.7, 57.5, 56.0, 55.7, 54.1, 45.9, 28.2.  $^{19}\text{F}$  NMR (376 MHz, Chloroform-d)  $\delta$  -62.52 (s, 3F), -62.82 (s, 3F). HRMS  $m/z$  (ESI $^+$ ): Calculated for  $\text{C}_{30}\text{H}_{26}\text{F}_6\text{NO}_2$  ( $[\text{M}+\text{H}]^+$ ): 546.1862, found 546.1862.

***(E)-6,7-dimethoxy-2-(3-(3-(trifluoromethyl)phenyl)allyl)-1-((3-(trifluoromethyl)phenyl)ethynyl)-1,2,3,4-tetrahydroisoquinoline***

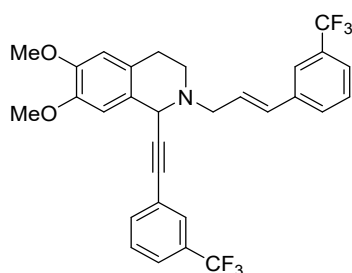

Purified by silica gel column chromatography (25–50% ethyl acetate in petroleum ether) afforded **4u** (133.5 mg, 49% yield) as yellow oil.  $^1\text{H}$  NMR (400 MHz, Chloroform-d)  $\delta$  7.71 (s, 1H), 7.68 (s, 1H), 7.66–7.55 (m, 3H), 7.51 (s, 1H), 7.47 (d,  $J = 10.3$  Hz, 2H), 6.79 (s, 1H), 6.75 (d,  $J = 15.8$  Hz, 1H), 6.66 (s, 1H), 6.55–6.43 (m, 1H), 4.91 (s, 1H), 3.89 (s, 3H), 3.88 (s, 3H), 3.62 (d,  $J = 6.7$  Hz, 2H), 3.20–2.91 (m, 3H), 2.80 (d,  $J = 16.5$  Hz, 1H).  $^{13}\text{C}$  NMR (100 MHz, Chloroform-d)  $\delta$  148.5, 147.6, 137.6, 134.9, 132.1, 131.0 (q,  $J_{(C-F)} = 32.4, 14.0$  Hz), 129.5, 129.1, 128.8, 128.6 (q,  $J_{(C-F)} = 3.9$  Hz), 126.4, 125.8, 124.2 (q,  $J_{(C-F)} = 3.9$  Hz), 124.0, 123.2 (q,  $J_{(C-F)} = 4.0$  Hz), 122.7, 111.4, 110.3, 88.8, 85.5, 57.5, 56.0, 55.9, 54.1, 45.9, 28.3.  $^{19}\text{F}$  NMR (376 MHz, Chloroform-d)  $\delta$  -62.82 (s, 3F), -62.95 (s, 3F). HRMS  $m/z$  (ESI $^+$ ): Calculated for  $\text{C}_{30}\text{H}_{26}\text{F}_6\text{NO}_2$  ( $[\text{M}+\text{H}]^+$ ): 546.1862, found 546.1862.

***(E)-6,7-dimethoxy-2-(3-(2-(trifluoromethyl)phenyl)allyl)-1-((2-(trifluoromethyl)phenyl)ethynyl)-1,2,3,4-tetrahydroisoquinoline***

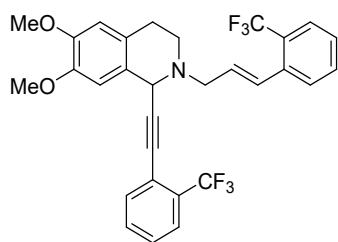

Purified by silica gel column chromatography (25–50% ethyl acetate in petroleum ether) afforded **4v** (144.1 mg, 53% yield) as yellow oil.  $^1\text{H NMR}$  (400 MHz, Chloroform- $d$ )  $\delta$  7.70 (d,  $J = 7.9$  Hz, 1H), 7.66 (d,  $J = 7.8$  Hz, 2H), 7.60 (d,  $J = 7.7$  Hz, 1H), 7.54–7.46 (m, 2H), 7.41–7.34 (m, 2H), 7.12 (d,  $J = 16.0$  Hz, 1H), 6.83 (s, 1H), 6.65 (s, 1H), 6.43–6.31 (m, 1H), 4.93 (s, 1H), 3.89 (s, 6H), 3.65 (d,  $J = 6.6$  Hz, 2H), 3.15–3.08 (m, 1H), 3.06–2.97 (m, 1H), 2.93 (d,  $J = 10.8$  Hz, 1H), 2.79 (d,  $J = 16.5$  Hz, 1H).  $^{13}\text{C NMR}$  (100 MHz, Chloroform- $d$ )  $\delta$  148.3, 147.5, 136.3 (q,  $J_{(C-F)} = 1.9$  Hz), 134.1, 131.9, 131.2 (q,  $J_{(C-F)} = 15.5$  Hz), 129.3, 129.2, 127.8, 127.5, 127.2, 126.6, 126.0, 125.7 (q,  $J_{(C-F)} = 5.3$  Hz), 125.0, 123.0, 122.3, 121.4 (q,  $J_{(C-F)} = 2.4$  Hz), 111.4, 110.4, 93.6, 82.9, 57.5, 55.9, 55.9, 54.5, 45.9, 28.5.  $^{19}\text{F NMR}$  (376 MHz, Chloroform- $d$ )  $\delta$  -59.52 (s, 3F), -62.08 (s, 3F). **HRMS**  $m/z$  (ESI $^+$ ): Calculated for  $\text{C}_{30}\text{H}_{26}\text{F}_6\text{NO}_2$  ( $[\text{M}+\text{H}]^+$ ): 546.1862, found 546.1862.

***(E)-6,7-dimethoxy-2-(3-(*m*-tolyl)allyl)-1-(*m*-tolylethynyl)-1,2,3,4-tetrahydroisoquinoline***

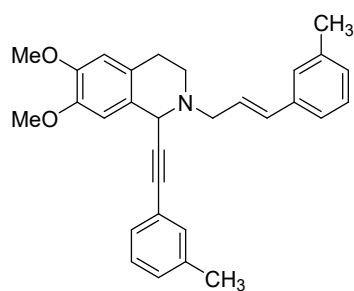

Purified by silica gel column chromatography (25–50% ethyl acetate in petroleum ether) afforded **4w** (72.1 mg, 33% yield) as light yellow oil.  $^1\text{H NMR}$  (400 MHz, Chloroform- $d$ )  $\delta$  7.30 (s, 3H), 7.28–7.24 (m, 2H), 7.22 (d,  $J = 7.5$  Hz, 1H), 7.15 (d,  $J = 7.6$  Hz, 1H), 7.10 (d,  $J = 5.8$  Hz, 1H), 6.81 (s, 1H), 6.74–6.63 (m, 2H), 6.45–6.36 (m, 1H), 4.89 (s, 1H), 3.89 (s, 3H), 3.88 (s, 3H), 3.59 (d,  $J = 6.1$  Hz, 2H), 3.17–2.88 (m, 3H), 2.79 (d,  $J = 11.2$  Hz, 1H), 2.37 (d,  $J = 10.5$  Hz, 6H).  $^{13}\text{C NMR}$  (100 MHz,



Chloroform-d)  $\delta$  148.2, 147.4, 138.2, 137.9, 137.0, 133.5, 132.4, 129.0, 128.9, 128.5, 128.4, 128.2, 127.3, 127.2, 126.5, 125.9, 123.6, 123.1, 111.4, 110.5, 87.0, 86.9, 57.8, 56.0, 55.9, 54.1, 45.9, 28.5, 21.4, 21.2. **HRMS**  $m/z$  (ESI<sup>+</sup>): Calculated for C<sub>30</sub>H<sub>32</sub>NO<sub>2</sub> ([M+H]<sup>+</sup>): 438.2428, found 438.2425.

***(E)*-6,7-dimethoxy-2-(3-(*o*-tolyl)allyl)-1-(*o*-tolylethynyl)-1,2,3,4-tetrahydroisoquinoline**

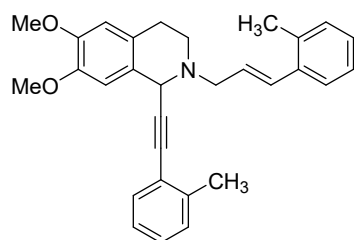

Purified by silica gel column chromatography (25–50% ethyl acetate in petroleum ether) afforded **4x** (104.6 mg, 48% yield) as yellow oil. **<sup>1</sup>H NMR** (400 MHz, Chloroform-d)  $\delta$  7.57–7.54 (m, 1H), 7.44 (d,  $J$  = 7.6 Hz, 1H), 7.23–7.12 (m, 6H), 6.95 (d,  $J$  = 15.7 Hz, 1H), 6.83 (s, 1H), 6.65 (s, 1H), 6.35–6.27 (m, 1H), 4.95 (s, 1H), 3.89 (s, 3H), 3.88 (s, 3H), 3.64 (d,  $J$  = 6.8 Hz, 2H), 3.16–3.09 (m, 1H), 3.08–2.99 (m, 1H), 2.95–2.92 (m, 1H), 2.80 (d,  $J$  = 16.6 Hz, 1H), 2.46 (s, 3H), 2.40 (s, 3H). **<sup>13</sup>C NMR** (100 MHz, Chloroform-d)  $\delta$  148.2, 147.4, 140.0, 136.1, 135.3, 132.0, 131.2, 130.3, 129.4, 128.1, 127.9, 127.5, 126.2, 125.9, 125.7, 125.5, 123.1, 111.4, 110.4, 91.4, 85.8, 58.1, 56.0, 55.9, 54.3, 45.9, 28.6, 21.1, 19.9. **HRMS**  $m/z$  (ESI<sup>+</sup>): Calculated for C<sub>30</sub>H<sub>32</sub>NO<sub>2</sub> ([M+H]<sup>+</sup>): 438.2428, found 438.2425.

***(E)*-6,7-dimethoxy-2-(3-(3-methoxyphenyl)allyl)-1-(3-methoxyphenyl)ethynyl)-1,2,3,4-tetrahydroisoquinoline**

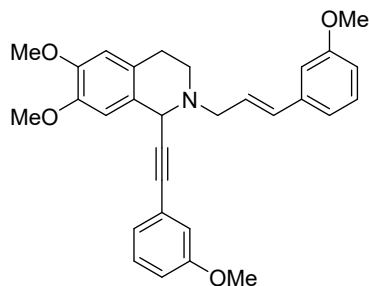

Purified by silica gel column chromatography (25–50% ethyl acetate in petroleum ether) afforded **4y** (131.3 mg, 56% yield) as yellow oil. **<sup>1</sup>H NMR** (400 MHz,

Chloroform-d)  $\delta$  7.32–7.25 (m, 1H), 7.24 (s, 1H), 7.12–7.03 (m, 2H), 7.01 (s, 2H), 6.93–6.86 (m, 1H), 6.83 (d,  $J$  = 13.9 Hz, 2H), 6.70 (d,  $J$  = 15.8 Hz, 1H), 6.65 (s, 1H), 6.47–6.35 (m, 1H), 4.89 (s, 1H), 3.89 (s, 3H), 3.88 (s, 3H), 3.84 (s, 3H), 3.82 (s, 3H), 3.59 (d,  $J$  = 7.0 Hz, 2H), 3.17–2.88 (m, 3H), 2.79 (d,  $J$  = 16.5 Hz, 1H).  $^{13}\text{C}$  NMR (100MHz, Chloroform-d)  $\delta$  159.9, 159.3, 148.3, 147.5, 138.5, 133.3, 129.6, 129.3, 127.1, 127.0, 126.0, 124.4, 124.2, 119.2, 116.8, 114.6, 113.4, 111.6, 111.4, 110.5, 87.2, 86.6, 57.7, 56.0, 55.9, 55.3, 55.2, 54.2, 45.9, 28.5. **HRMS**  $m/z$  (ESI<sup>+</sup>): Calculated for  $\text{C}_{30}\text{H}_{32}\text{NO}_4$  ( $[\text{M}+\text{H}]^+$ ): 470.2326, found 470.2332.

***(E)*-2-(hept-2-en-1-yl)-1-(hex-1-yn-1-yl)-6,7-dimethoxy-1,2,3,4-tetrahydroisoquinoline**

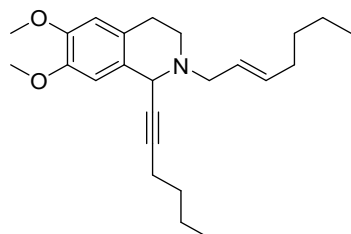

Purified by silica gel column chromatography (25–50% ethyl acetate in petroleum ether) afforded **4z** (72.1 mg, 39% yield) as yellow oil.  $^1\text{H}$  NMR (400 MHz, Chloroform-d)  $\delta$  6.75 (s, 1H), 6.57 (s, 1H), 5.79–5.67 (m, 1H), 5.61–5.50 (m, 1H), 4.54 (s, 1H), 3.87 (s, 3H), 3.85 (s, 3H), 3.35–3.18 (m, 2H), 2.97–2.84 (m, 2H), 2.78–2.66 (m, 2H), 2.27–2.19 (m, 2H), 2.09 (q,  $J$  = 6.7 Hz, 2H), 1.54–1.30 (m, 8H), 0.97–0.87 (m, 6H).  $^{13}\text{C}$  NMR (100 MHz, Chloroform-d)  $\delta$  148.06, 147.35, 134.83, 128.26, 126.40, 125.89, 111.43, 110.66, 86.64, 77.92, 57.32, 55.95, 55.84, 53.75, 45.42, 32.04, 31.43, 31.04, 28.39, 22.18, 21.92, 18.49, 13.86, 13.51. **HRMS**  $m/z$  (ESI<sup>+</sup>): Calculated for  $\text{C}_{24}\text{H}_{36}\text{NO}_2$  ( $[\text{M}+\text{H}]^+$ ): 370.2741, found 370.2744.

***2*-(3-(4-fluorophenyl)prop-2-yn-1-yl)-6,7-dimethoxy-1,2,3,4-tetrahydroisoquinoline**

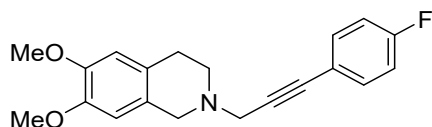

Purified by silica gel column chromatography (25–50% ethyl acetate in petroleum ether) afforded **5a** (1.13 g, 70% yield) as yellow oil.  $^1\text{H}$  NMR (400 MHz,

Chloroform-d)  $\delta$  7.44–7.40 (m, 2H), 6.99 (t,  $J = 8.7$  Hz, 2H), 6.61 (s, 1H), 6.56 (s, 1H), 3.85 (s, 3H), 3.84 (s, 3H), 3.76 (s, 2H), 3.70 (s, 2H), 2.89 (s, 4H).  $^{13}\text{C}$  NMR (100 MHz, Chloroform-d)  $\delta$  162.4 (d,  $J = 249.1$  Hz), 147.7, 147.4, 133.6 (d,  $J = 8.3$  Hz), 126.4, 125.8, 119.2 (d,  $J = 3.4$  Hz), 115.6, 115.4, 111.5, 109.6, 84.3 (d,  $J = 8.7$  Hz), 55.9, 55.9, 54.2, 50.0, 47.5, 28.8.  $^{19}\text{F}$  NMR (376 MHz, Chloroform-d)  $\delta$  -111.25 (s, 1F). **HRMS**  $m/z$  (ESI+): Calculated for  $\text{C}_{20}\text{H}_{21}\text{FNO}_2$  ( $[\text{M}+\text{H}]^+$ ): 326.1551, found 326.1542.

*N*-(3,4-dimethoxyphenethyl)-3-(4-fluorophenyl)-*N*-(3-(4-fluorophenyl)prop-2-yn-1-yl)prop-2-yn-1-amine

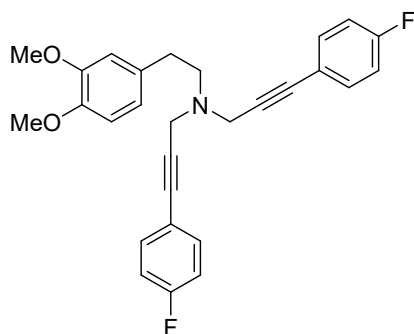

Purified by silica gel column chromatography (25–50% ethyl acetate in petroleum ether) afforded **6** (1.78g, 80% yield) as yellow oil.  $^1\text{H}$  NMR (400 MHz, Chloroform-d)  $\delta$  7.48–7.38 (m, 4H), 7.01 (t,  $J = 8.7$  Hz, 4H), 6.81 (d,  $J = 5.6$  Hz, 3H), 3.87 (s, 3H), 3.85 (s, 3H), 3.78 (s, 4H), 2.98–2.94 (m, 2H), 2.88–2.84 (m, 2H).  $^{13}\text{C}$  NMR (100 MHz, Chloroform-d)  $\delta$  162.4 (d,  $J = 249.3$  Hz), 149.0, 147.6, 133.6 (d,  $J = 8.3$  Hz), 132.6, 120.6, 119.2 (d,  $J = 3.5$  Hz), 115.6, 115.4, 112.2, 111.5, 84.3 (d,  $J = 1.5$  Hz), 84.2, 56.0, 55.8, 55.1, 43.4, 33.9.  $^{19}\text{F}$  NMR (376 MHz, Chloroform-d)  $\delta$  -111.08 (s, 2F). **HRMS**  $m/z$  (ESI+): Calculated for  $\text{C}_{28}\text{H}_{26}\text{F}_2\text{NO}_2$  ( $[\text{M}+\text{H}]^+$ ): 446.1926, found 446.1925.

*4*-(3-(6,7-dimethoxy-3,4-dihydroisoquinolin-2(1H)-yl)prop-1-yn-1-yl)benzotrile

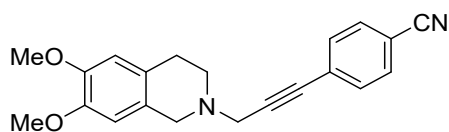

Purified by silica gel column chromatography (25–50% ethyl acetate in petroleum

ether) afforded **5p** (83 mg, 50% yield) as yellow oil.  $^1\text{H NMR}$  (400 MHz, Chloroform- $d$ )  $\delta$  7.59 (d,  $J = 8.4$  Hz, 2H), 7.52 (d,  $J = 8.4$  Hz, 2H), 6.62 (s, 1H), 6.56 (s, 1H), 3.85 (d,  $J = 4.5$  Hz, 6H), 3.76 (d,  $J = 9.0$  Hz, 4H), 2.90 (s, 4H).  $^{13}\text{C NMR}$  (100MHz, Chloroform- $d$ )  $\delta$  147.7, 147.4, 132.2, 132.0, 128.0, 126.2, 125.6, 118.4, 111.6, 109.6, 89.5, 84.0, 56.0, 55.9, 54.2, 50.1, 47.5, 28.8. **HRMS**  $m/z$  (ESI $^+$ ): Calculated for  $\text{C}_{21}\text{H}_{21}\text{N}_2\text{O}_2$  ( $[\text{M}+\text{H}]^+$ ): 333.1598, found 333.1588.

### 6,7-dimethoxy-1,2,3,4-tetrahydroisoquinoline

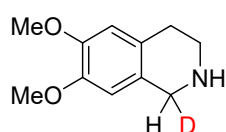

50 mL dry THF were added to 8 mmol  $\text{LiAlD}_4$  (0.336 mg) followed by addition of 6,7-dimethoxy-3,4-dihydroisoquinoline (4 mmol, 0.764 mL) under nitrogen atmosphere. The mixture was refluxed for 40 h, cooled to 0  $^\circ\text{C}$ , 30% NaOH (100 mL) was added slowly to the reaction. The aq. phase was separated and extracted with THF (200 mL). The combined org. phase was dried ( $\text{Na}_2\text{SO}_4$ ) and concentrated under reduced pressure to (yield 60-70% in two steps) as yellow oil.  $^1\text{H NMR}$  (400 MHz, Chloroform- $d$ )  $\delta$  6.57 (s, 1H), 6.49 (s, 1H), 3.90 (s, 1H), 3.86 (s, 3H), 3.85 (s, 3H), 3.10 (t,  $J = 6.0$  Hz, 2H), 2.70 (t,  $J = 5.9$  Hz, 2H), 2.67 (s, 1H).  $^{13}\text{C NMR}$  (100 MHz, Chloroform- $d$ )  $\delta$  147.6, 147.4, 126.5, 126.3, 112.1, 109.3, 55.9, 43.5, 29.6, 28.23

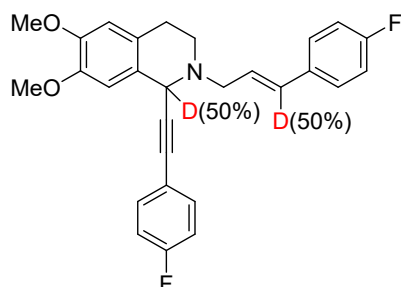

Purified by silica gel column chromatography (25–50% ethyl acetate in petroleum ether) afforded **9** (64.2 mg, 58% yield) as yellow oil.  $^1\text{H NMR}$  (400 MHz, Chloroform- $d$ )  $\delta$  7.47–7.36 (m, 4H), 7.03 (q,  $J = 8.6$  Hz, 4H), 6.79 (d,  $J = 2.1$  Hz, 1H), 6.66 (d,  $J = 19.0$  Hz, 1.5H), 6.37 – 6.25 (m, 1H), 4.85 (s, 1H), 3.88 (s, 6H), 3.56 (d,  $J = 7.0$  Hz, 2H), 3.13 – 2.96 (m, 2H), 2.95 – 2.87 (m, 1H), 2.77 (d,  $J = 15.1$  Hz, 1H).

$^{13}\text{C}$  NMR (100 MHz, Chloroform-*d*)  $\delta$  163.6 (d,  $J = 9.1$  Hz), 161.1 (d,  $J = 6.9$  Hz), 148.4, 147.5, 133.6, 133.6, 132.2, 127.9 (d,  $J = 2.2$  Hz), 127.8 (d,  $J = 2.2$  Hz), 126.3 (d,  $J = 2.4$  Hz), 126.2, 125.9, 119.2 (d,  $J = 3.6$  Hz), 115.6, 115.4, 111.5, 110.6 (d,  $J = 2.7$  Hz), 87.0 (d,  $J = 5.1$  Hz), 85.7 (d,  $J = 2.9$  Hz), 57.6, 56.0, 55.9, 54.1, 45.8, 28.4.  
 $^{19}\text{F}$  NMR (376 MHz, Chloroform-*d*)  $\delta$  -111.18(s,1F), -114.45(s,1F).

## Control Experiments

### Scheme 2a

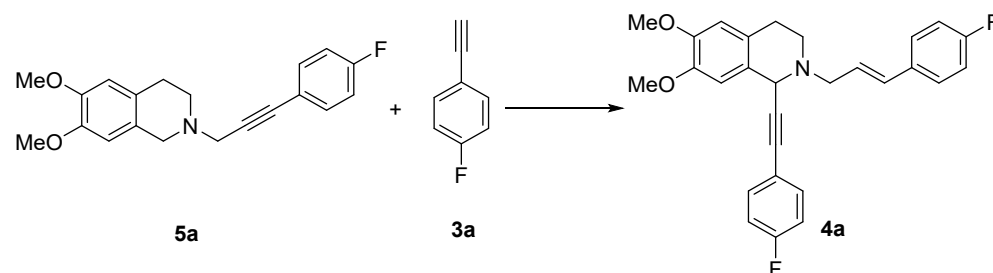

#### Standard Conditions:

In the air atmosphere, a 10 mL reaction tube was charged with the propargylamine **5a** (81 mg, 0.25 mmol), 1-ethynyl-4-fluorobenzene **3a** (30 mg, 0.25 mmol), CuI (30 mol%, 14 mg), TFA (114 mg, 4.0 equiv) and toluene (2.0 mL), then sealed. Subsequently, the reaction mixture was stirred at 80 °C for 24 h. The desired product **4a** not detected.

#### Conditions A:

In the air atmosphere, a 10 mL reaction tube was charged with the propargylamine **5a** (81 mg, 0.25 mmol), 1-ethynyl-4-fluorobenzene **3a** (30 mg, 0.25 mmol), TFA (114 mg, 4.0 equiv) and toluene (2.0 mL), then sealed. Subsequently, the reaction mixture was stirred at 80 °C for 24 h. The desired product **4a** not detected.

#### Conditions B:

In the air atmosphere, a 10 mL reaction tube was charged with the propargylamine **5a** (81 mg, 0.25 mmol), 1-ethynyl-4-fluorobenzene **3a** (30 mg, 0.25 mmol), CuI (30 mol%, 14 mg) and toluene (2.0 mL), then sealed. Subsequently, the reaction mixture was stirred at 80 °C for 24 h. The residue was purified by flash chromatography (25–50% ethyl acetate in petroleum ether) to afford the desired products **4a** in 25% yield.

### Scheme 2b

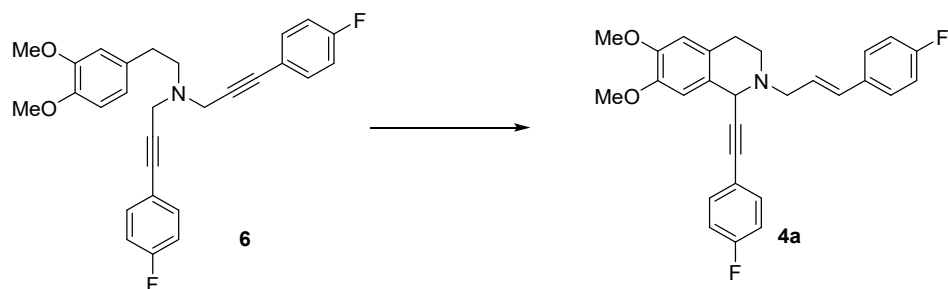

#### Standard Conditions:

In the air atmosphere, a 10 mL reaction tube was charged with the propargylamine **6** (111.25 mg, 0.25 mmol), CuI (30 mol%, 14 mg), TFA (114 mg, 4.0 equiv), and toluene (2.0 mL), then sealed. Subsequently, the reaction mixture was stirred at 80 °C for 24 h. The desired product **4a** not detected.

#### Conditions A:

In the air atmosphere, a 10 mL reaction tube was charged with the propargylamine **6** (111.25 mg, 0.25 mmol), CuI (30 mol%, 14 mg) and toluene (2.0 mL), then sealed. Subsequently, the reaction mixture was stirred at 80 °C for 24 h. The desired product **4a** not detected.

### Scheme 2c

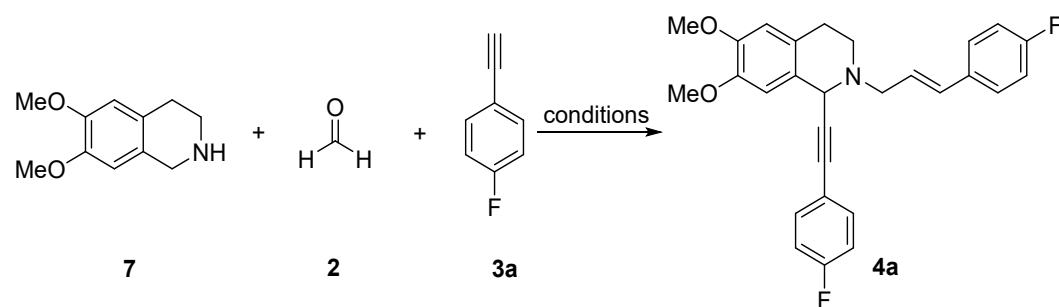

#### Standard Conditions:

In the air atmosphere, a 10 mL reaction tube was charged with the amine **7** (48 mg, 0.25 mmol), 37 w/w% formaldehyde solution **2** (49 mg, 0.6 mmol), 1-ethynyl-4-fluorobenzene **3a** (72 mg, 0.6 mmol), CuI (30 mol%, 14 mg), TFA (114 mg, 4.0 equiv) and toluene (2.0 mL), then sealed. Subsequently, the reaction mixture was stirred at 80 °C for 24 h. The residue was purified by flash chromatography (25–50% ethyl acetate in petroleum ether) to afford the desired products **4a** in 71%.

#### Conditions A:

In the air atmosphere, a 10 mL reaction tube was charged with the amine **7** (48 mg, 0.25 mmol), 37 w/w% formaldehyde solution **2** (49 mg, 0.6 mmol), 1-ethynyl-4-fluorobenzene **3a** (120 mg, 0.6 mmol), CuI (30 mol%, 14 mg) and toluene (2.0 mL), then sealed. Subsequently, the reaction mixture was stirred at 80 °C for 24 h. The residue was purified by flash chromatography (25–50% ethyl acetate in petroleum ether) to afford the desired products **4a** in 20%.



### Scheme 2d

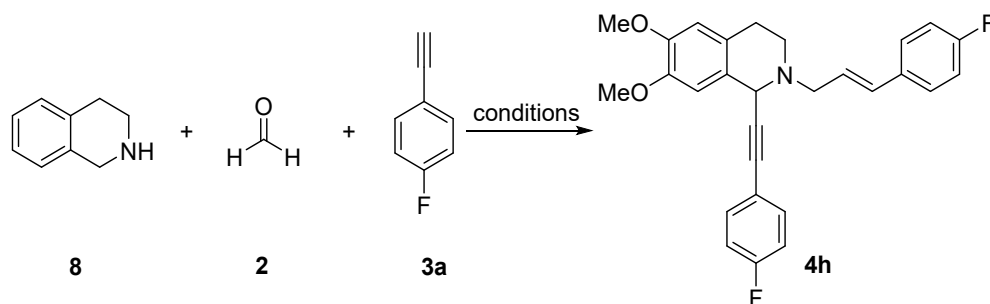

#### Standard Conditions:

In the air atmosphere, a 10 mL reaction tube was charged with the amine **8** (33 mg, 0.25 mmol), 37 w/w% formaldehyde solution **2** (49 mg, 0.6 mmol), 1-ethynyl-4-fluorobenzene **3a** (72 mg, 0.6 mmol), CuI (30 mol%, 14 mg), TFA (114 mg, 4.0 equiv) and toluene (2.0 mL), then sealed. Subsequently, the reaction mixture was stirred at 80 °C for 24 h. The residue was purified by flash chromatography (25–50% ethyl acetate in petroleum ether) to afford the desired products **4h** in 52%.

### Scheme 2e

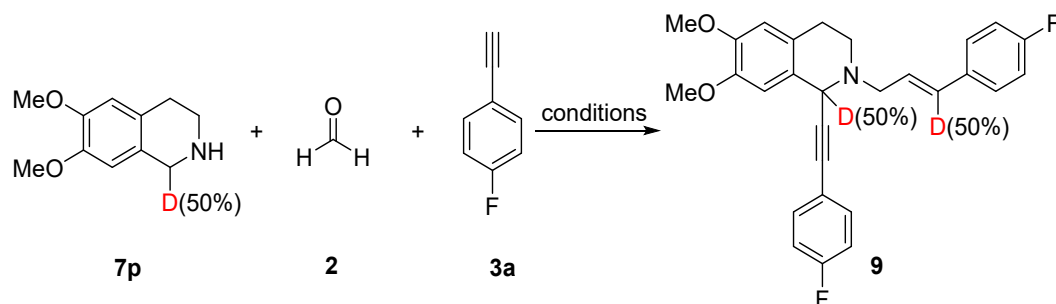

In the air atmosphere, a 10 mL reaction tube was charged with the amine **7p** (48 mg, 0.25 mmol), 37 w/w% formaldehyde solution **2** (49 mg, 0.6 mmol), 1-ethynyl-4-fluorobenzene **3a** (72 mg, 0.6 mmol), CuI (30 mol%, 14 mg), TFA (114 mg, 4.0 equiv) and toluene (2.0 mL), then sealed. Subsequently, the reaction mixture was stirred at 80 °C for 24 h. The residue was purified by flash chromatography (25–50% ethyl acetate in petroleum ether) to afford the desired products **9** in 58%.

## Scheme 2f

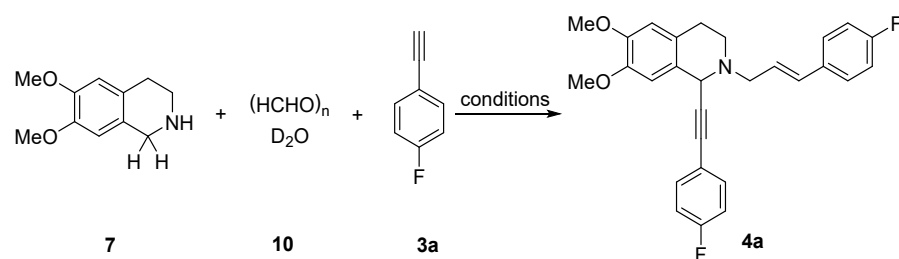

In the air atmosphere, a 10 mL reaction tube was charged with the amine **7** (48 mg, 0.25 mmol), paraformaldehyde solution in  $\text{D}_2\text{O}$  **10** (0.5 mL, 0.6 mmol), 1-ethynyl-4-fluorobenzene **3a** (72 mg, 0.6 mmol), CuI (30 mol%, 14 mg), TFA (114 mg, 4.0 equivl) and toluene (2.0 mL), then sealed. Subsequently, the reaction mixture was stirred at 80 °C for 24 h. The residue was purified by flash chromatography (25–50% ethyl acetate in petroleum ether) to afford the desired products **4a** in 50%.

## REFERENCES

- (1) Zhang, Y. Z.; Huang, L. L.; Li, X. Y.; Wang, L.; Feng, H. D. Chemo- and Diastereoselective Synthesis of *N*-Propargyl Oxazolidines through a Copper-Catalyzed Domino  $\text{A}^3$  Reaction. *J. Org. Chem.*, **2019**, *84*, 5046–5055.
- (2) Daniel, R.; Waldemar, S.; Anne, G.; Yu, Z.; Shoubhik, D.  $\text{CO}_2$ -Catalyzed Efficient Dehydrogenation of Amines with Detailed Mechanistic and Kinetic Studies. *ACS Catal.*, **2018**, *8*, 11679–11687.

# <sup>1</sup>H NMR and <sup>13</sup>C NMR spectra

## *(E)*-2-(3-(4-fluorophenyl)allyl)-1-((4-fluorophenyl)ethynyl)-6,7-dimethoxy-1,2,3,4-tetrahydroisoquinoline (4a)

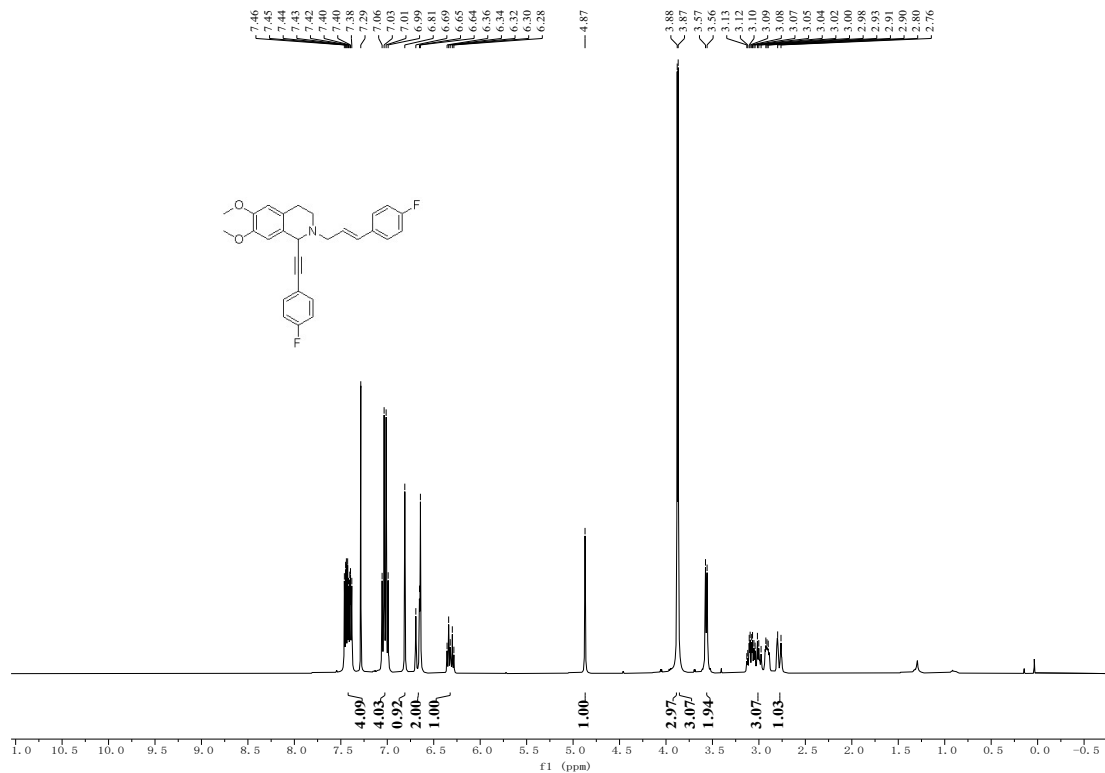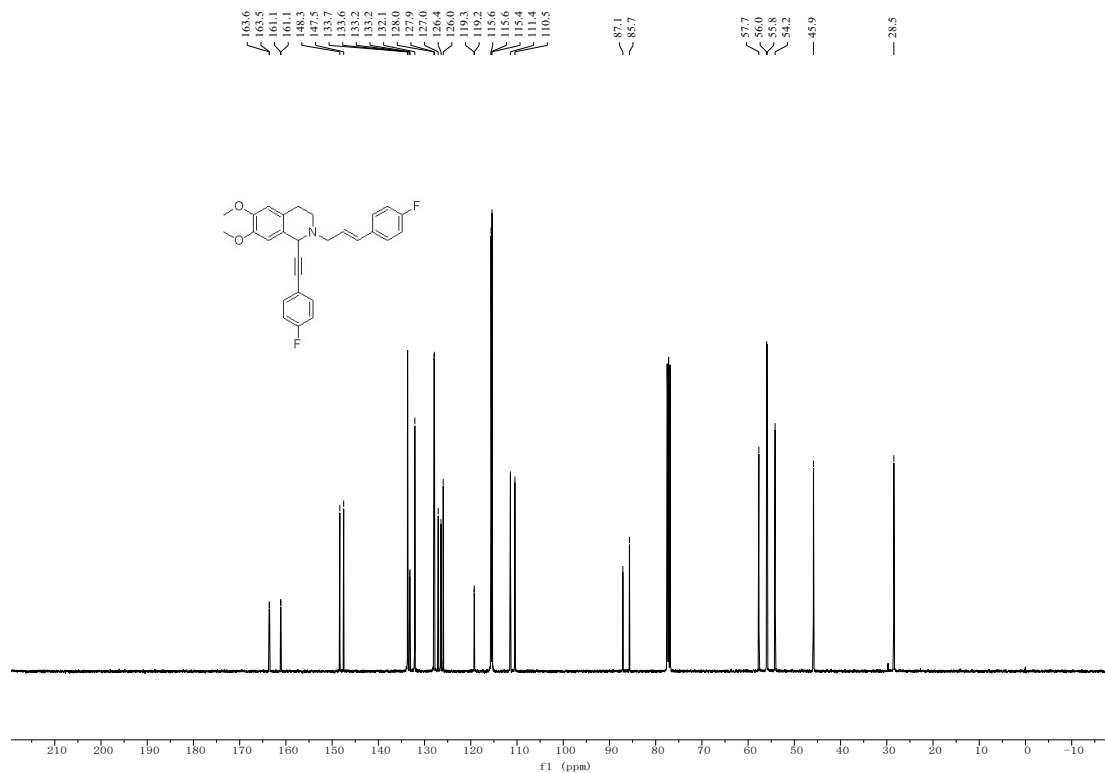

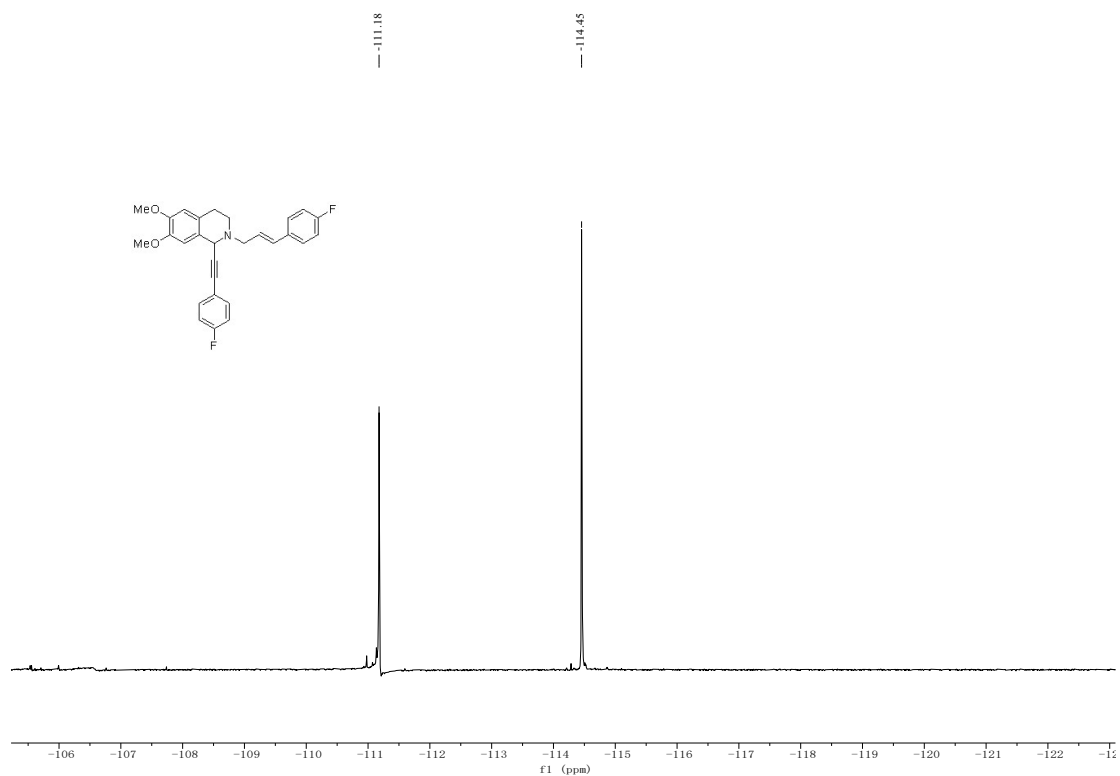

**(E)-2-(3-(4-fluorophenyl)allyl)-1-((4-fluorophenyl)ethynyl)-6-methoxy-1,2,3,4-tetrahydroisoquinoline (4b)**

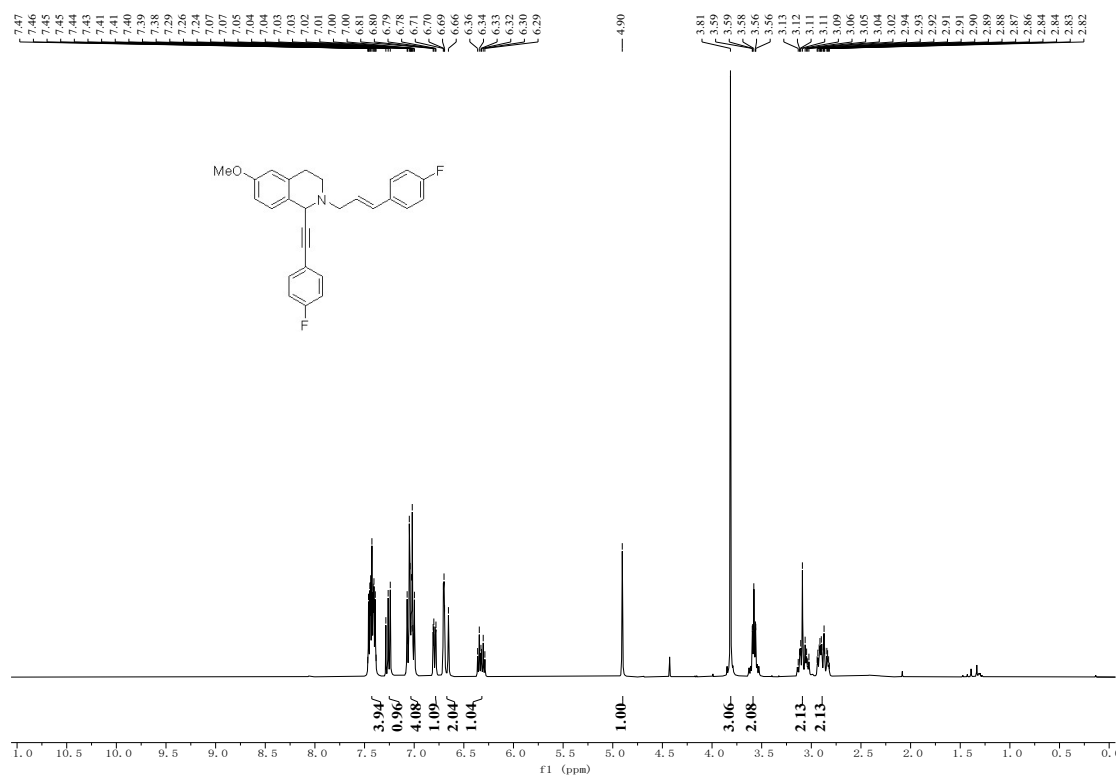

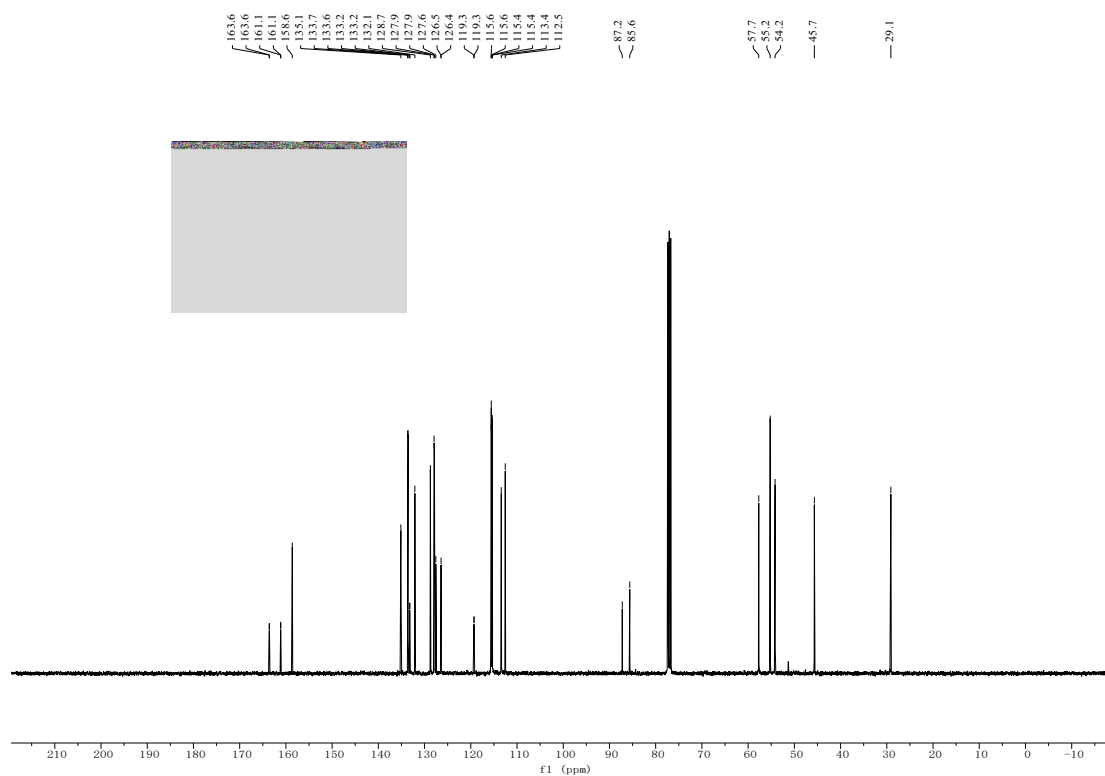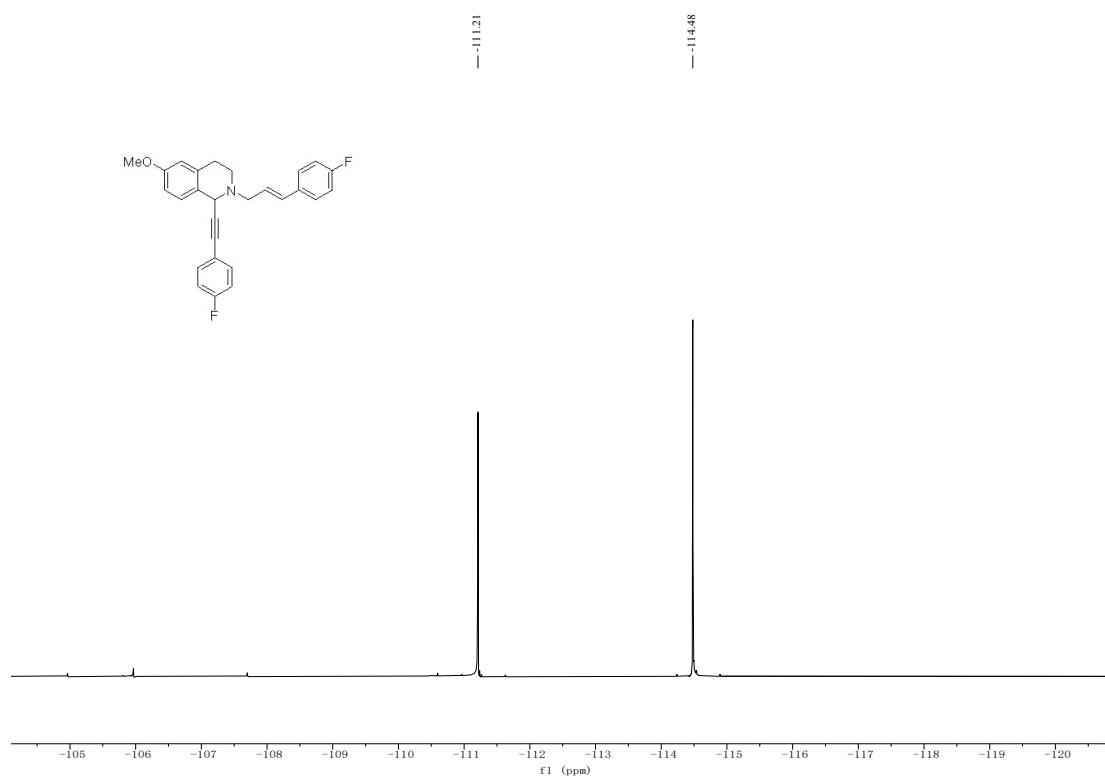

***(E)-6-(3-(4-fluorophenyl)allyl)-5-((4-fluorophenyl)ethynyl)-5,6,7,8-tetrahydro[1,3]dioxolo[4,5-g]isoquinoline (4c)***

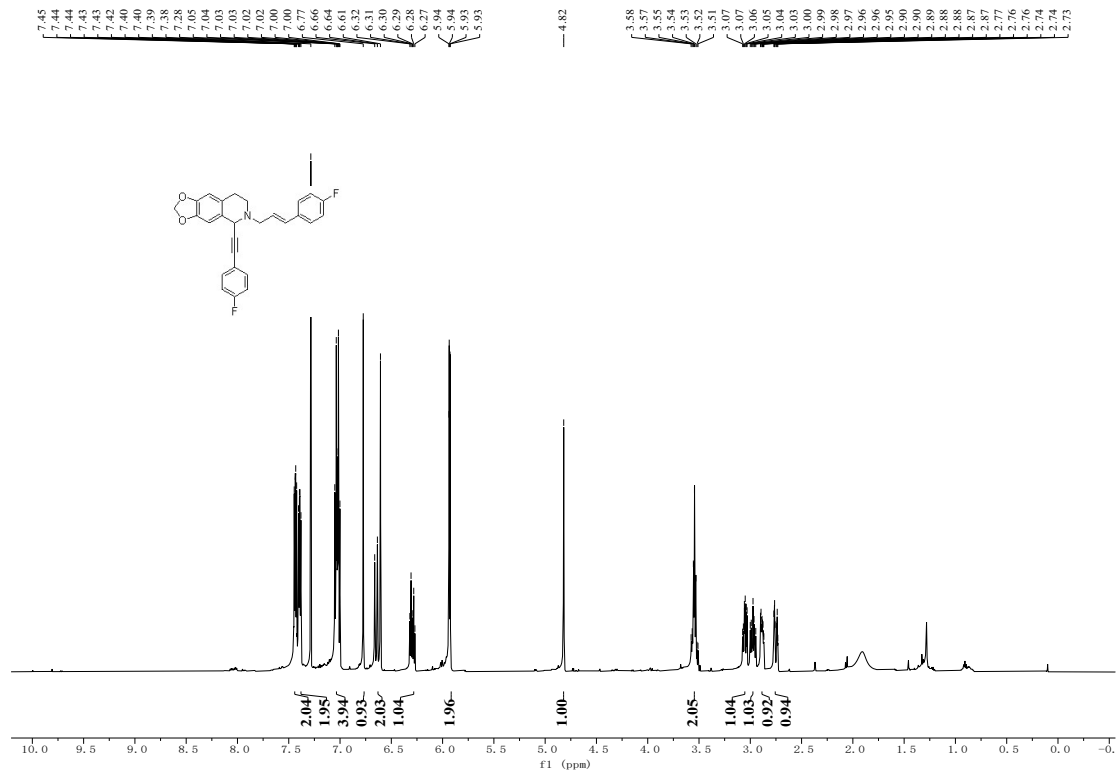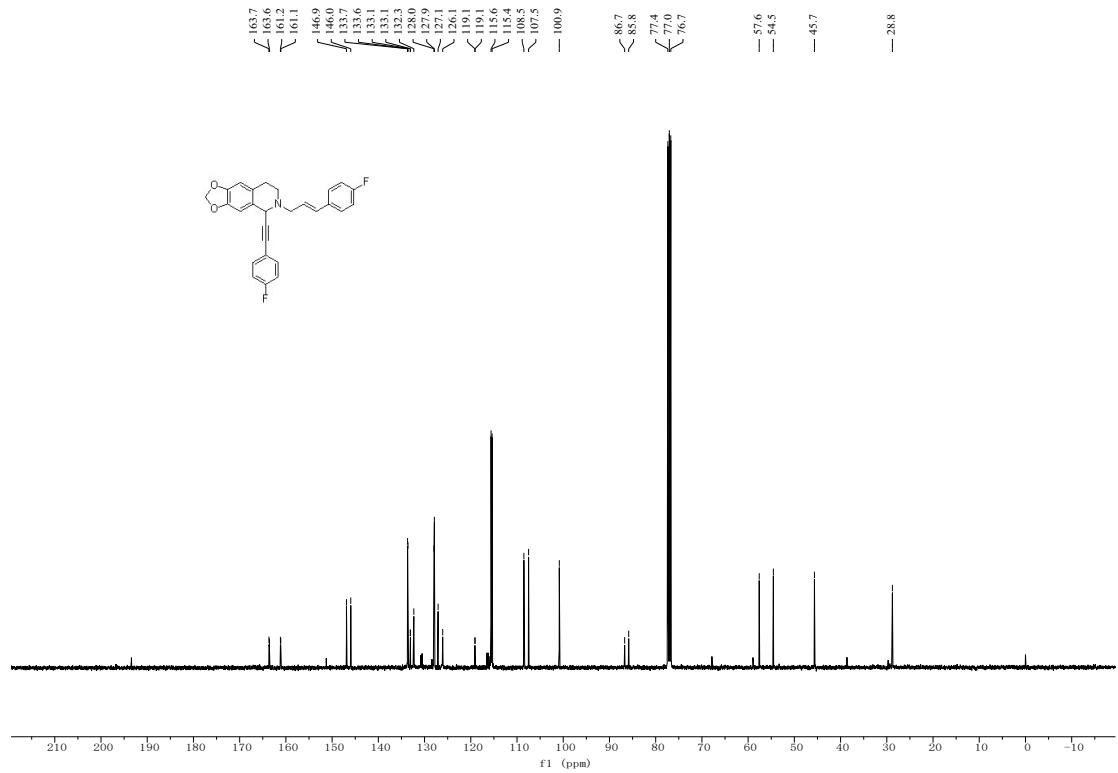

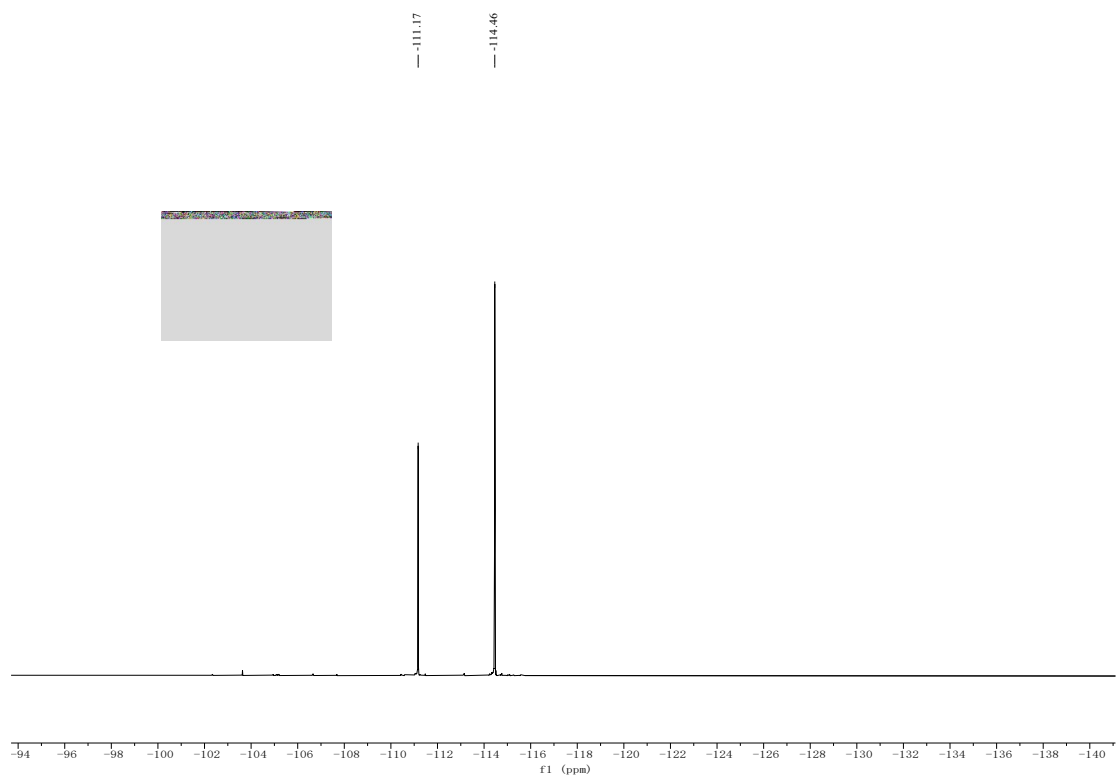

***(E)*-7-(3-(4-fluorophenyl)allyl)-6-((4-fluorophenyl)ethynyl)-2,3,6,7,8,9-hexahydro-[1,4]dioxino[2,3-g]isoquinoline (4d)**

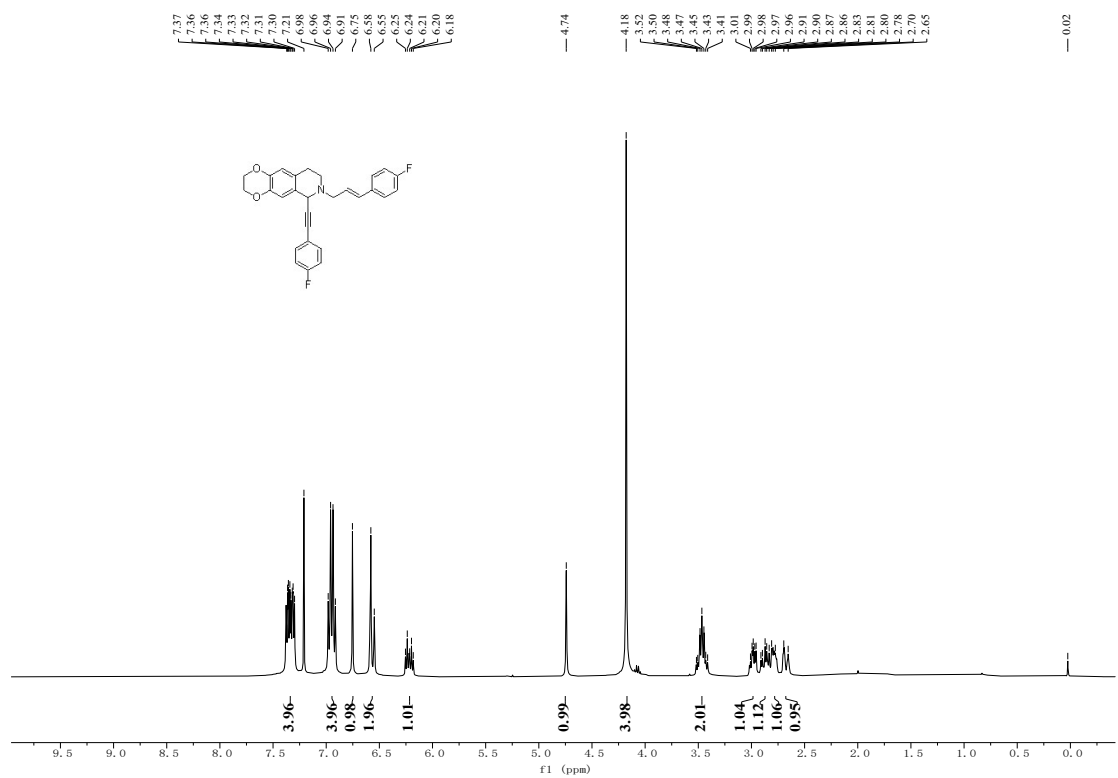

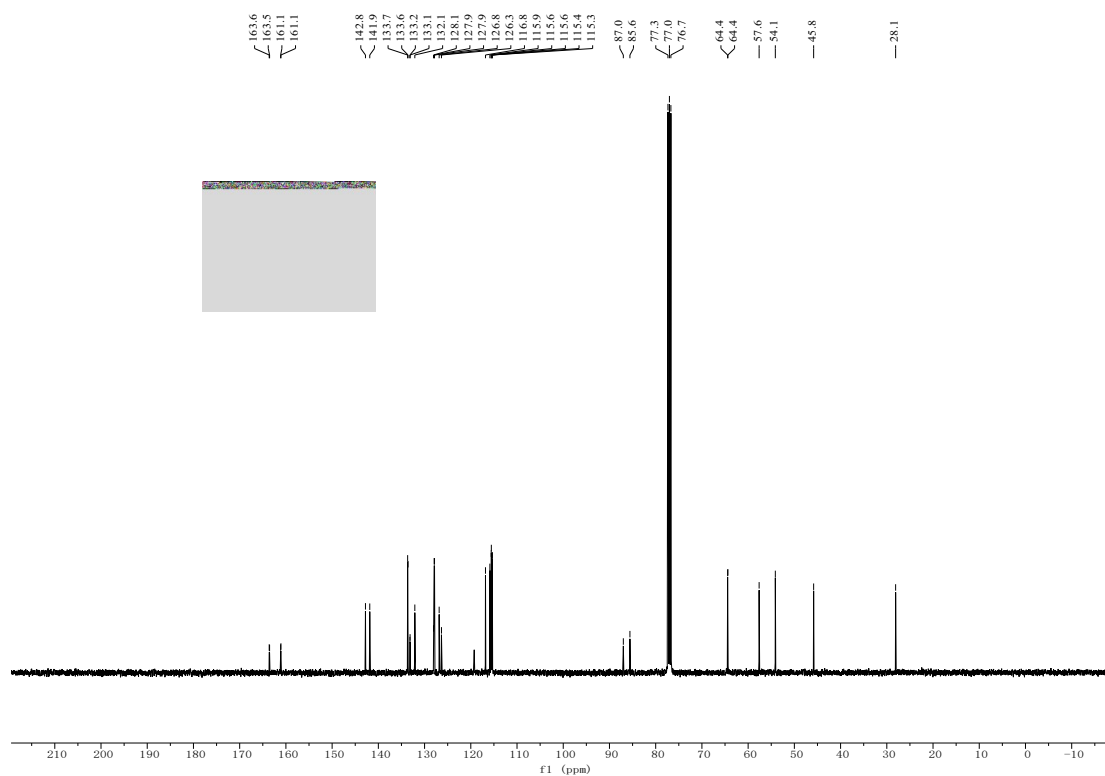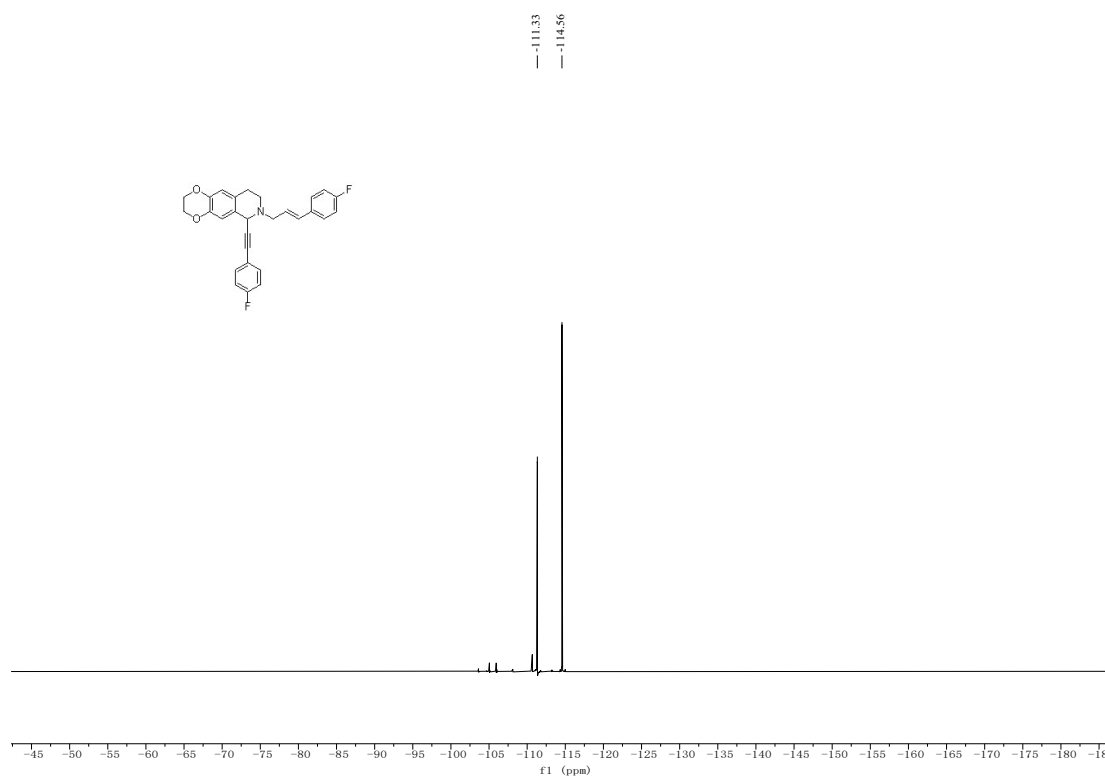

***(E)*-6,7-diethoxy-2-(3-(4-fluorophenyl)allyl)-1-((4-fluorophenyl)ethynyl)-1,2,3,4-tetrahydroisoquinoline (4e)**



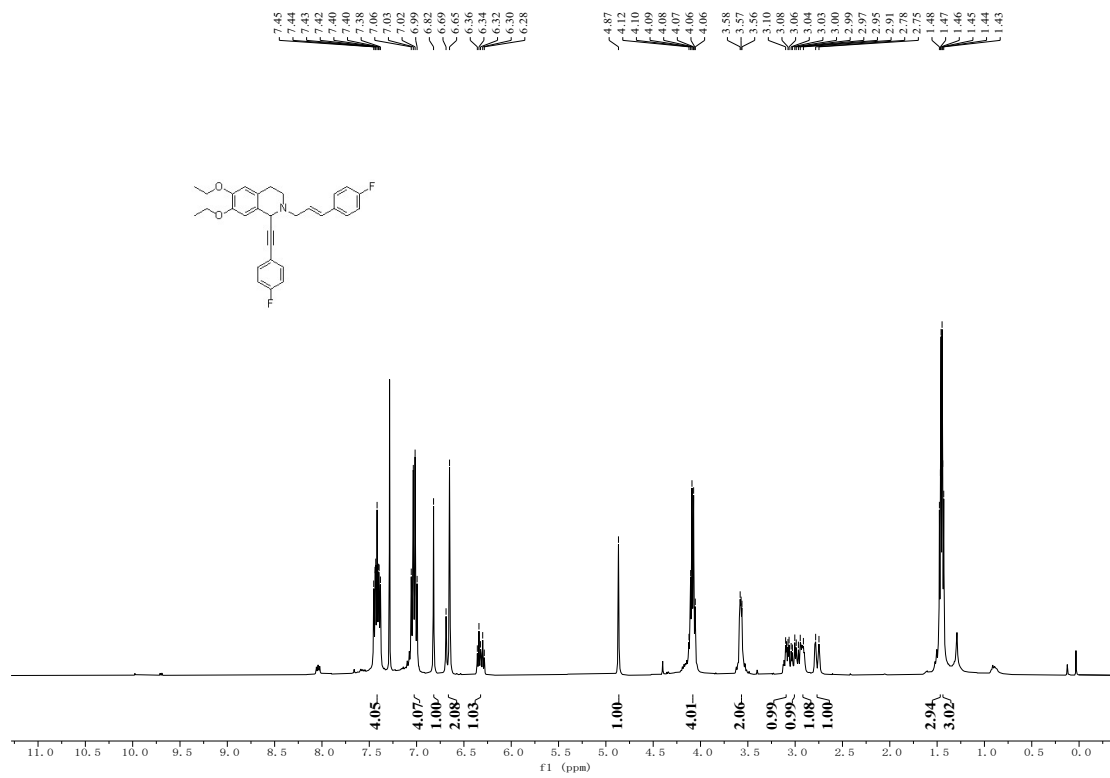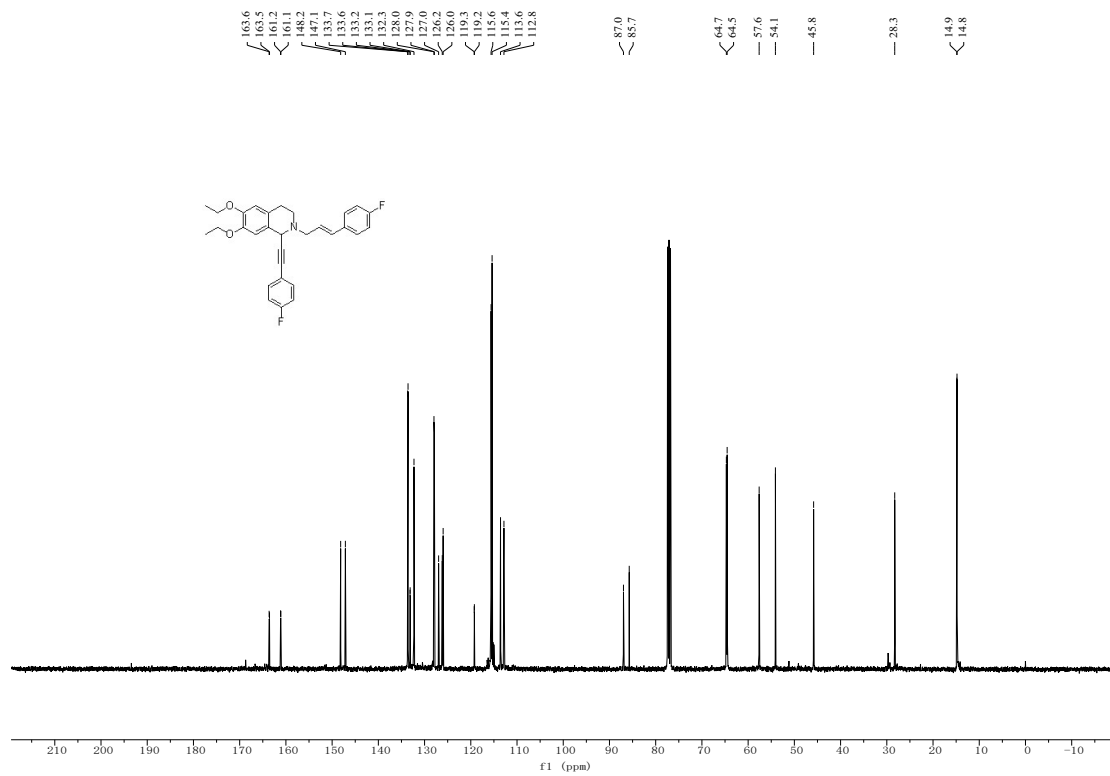

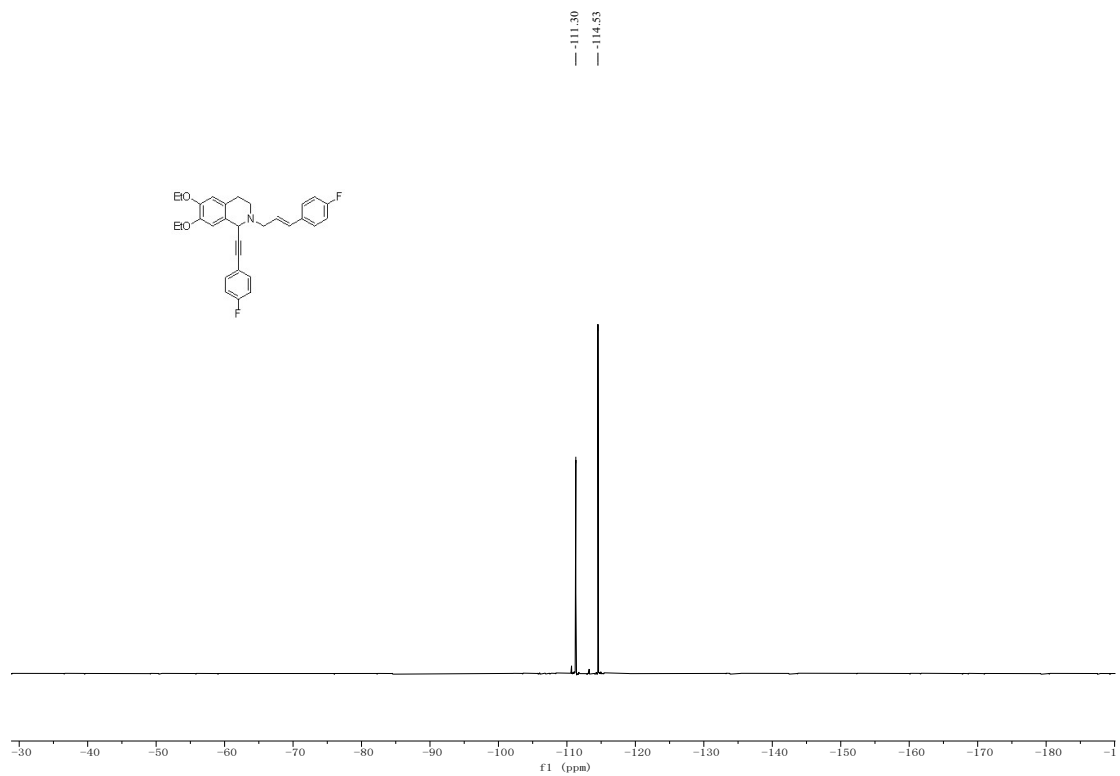

**(E)-2-(3-(4-fluorophenyl)allyl)-1-((4-fluorophenyl)ethynyl)-6-methoxy-7-methyl-1,2,3,4-tetrahydroisoquinoline (4f)**

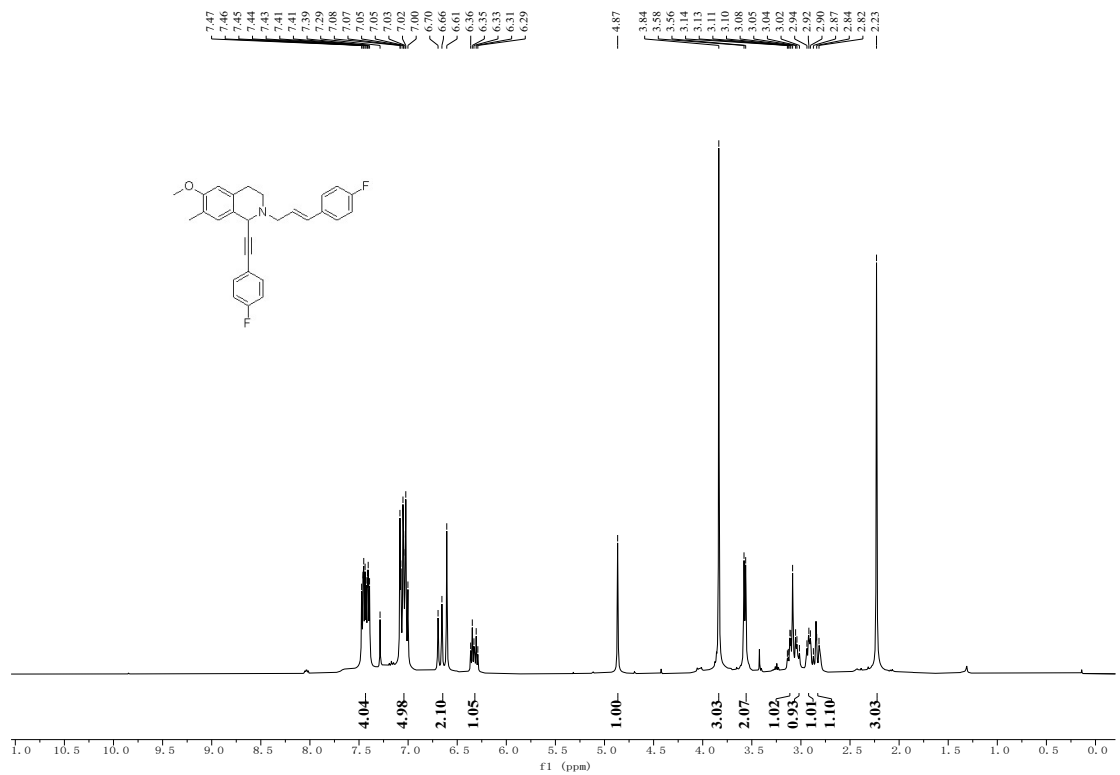

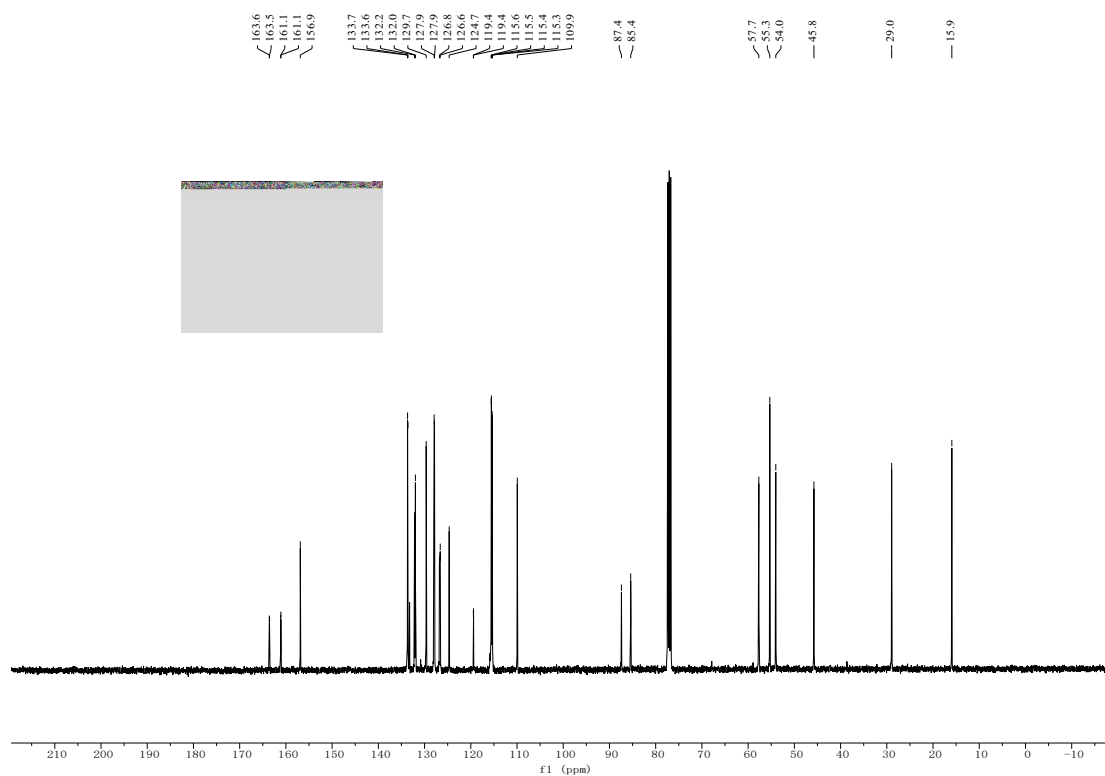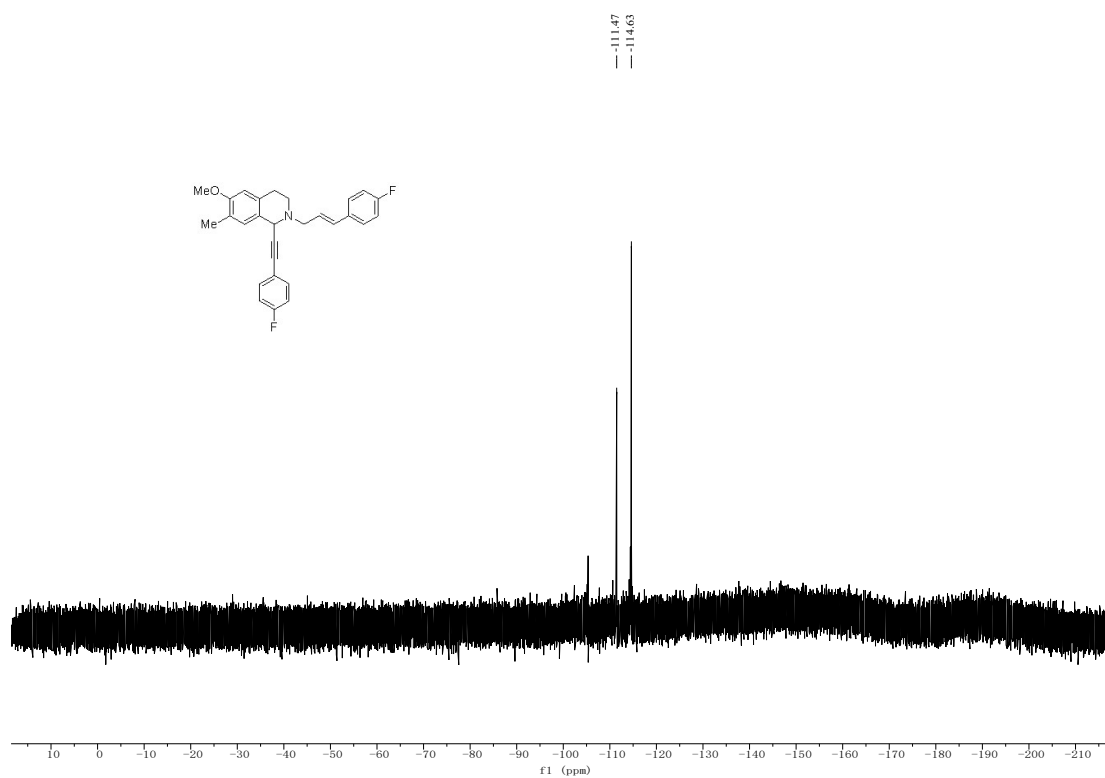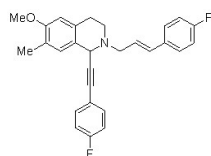

***(E)*-6-(3-(4-fluorophenyl)allyl)-7-((4-fluorophenyl)ethynyl)-4,5,6,7-tetrahydrothieno[2,3-c]pyridine (4g)**

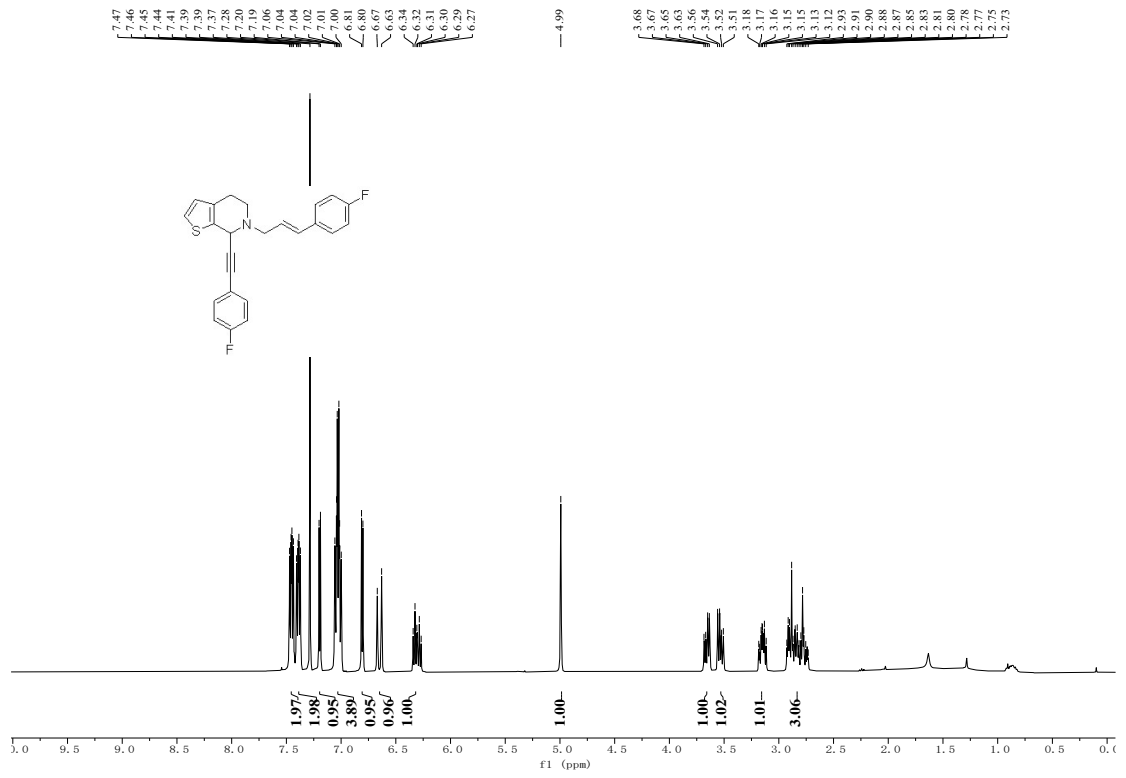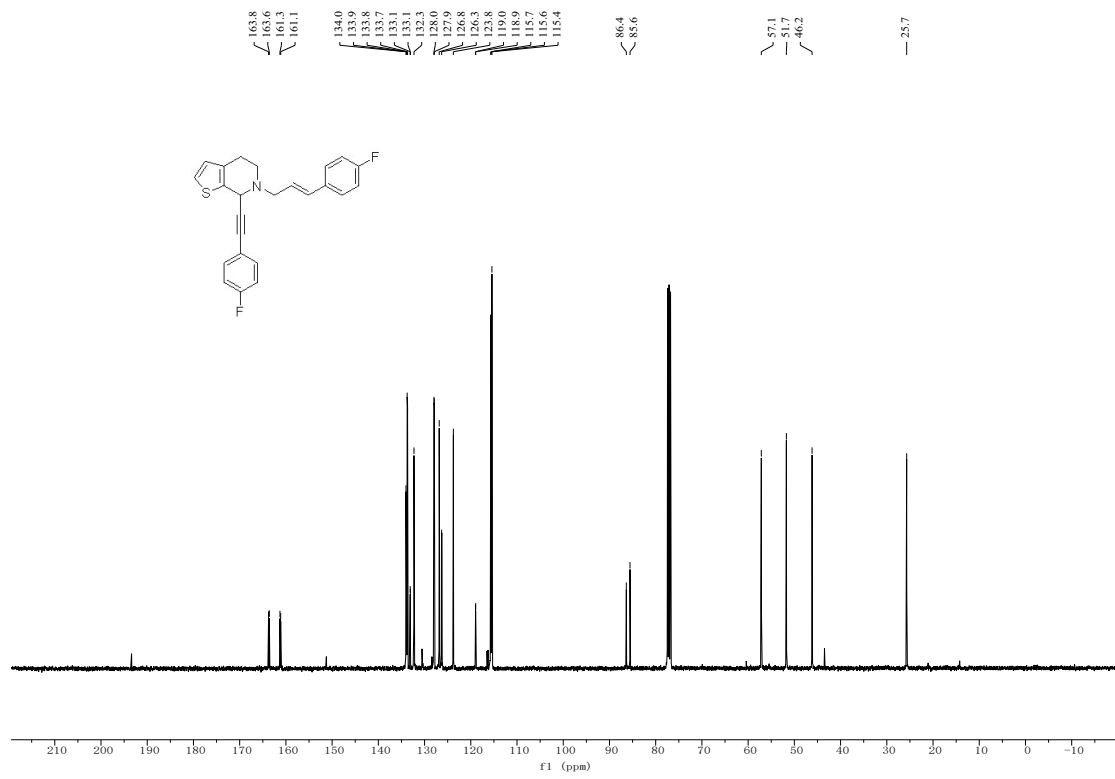

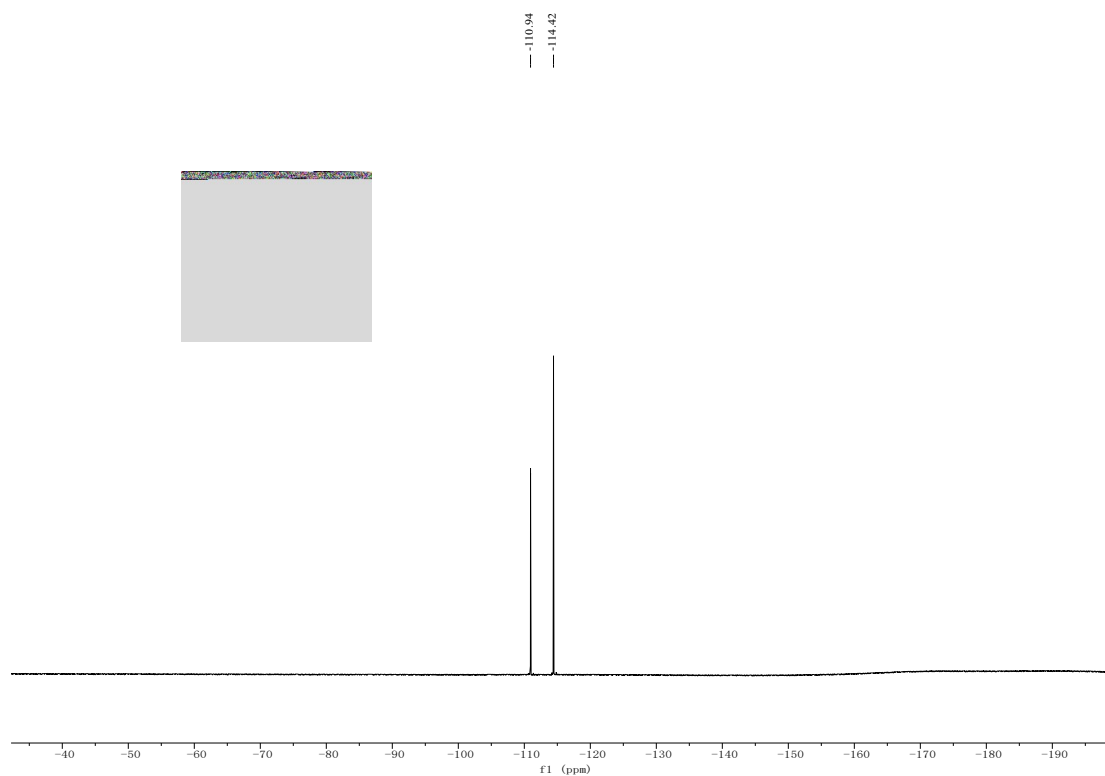

**(E)-2-(3-(4-fluorophenyl)allyl)-1-((4-fluorophenyl)ethynyl)-1,2,3,4-tetrahydroisoquinoline(4h)**

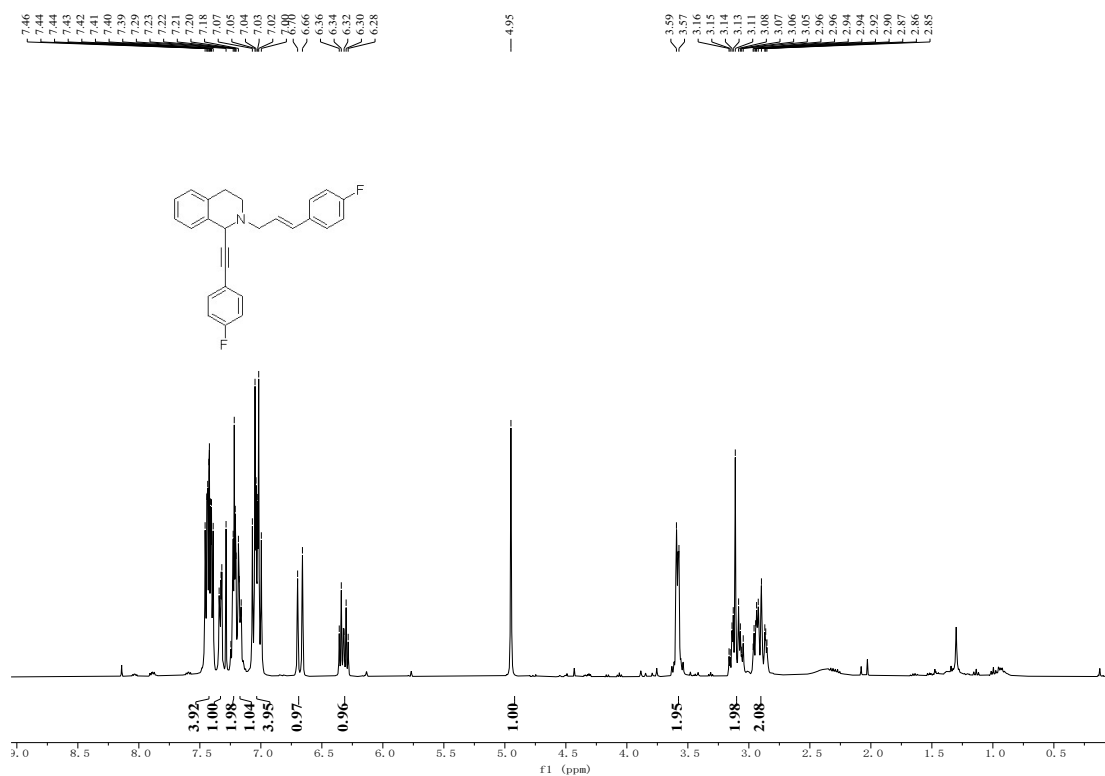

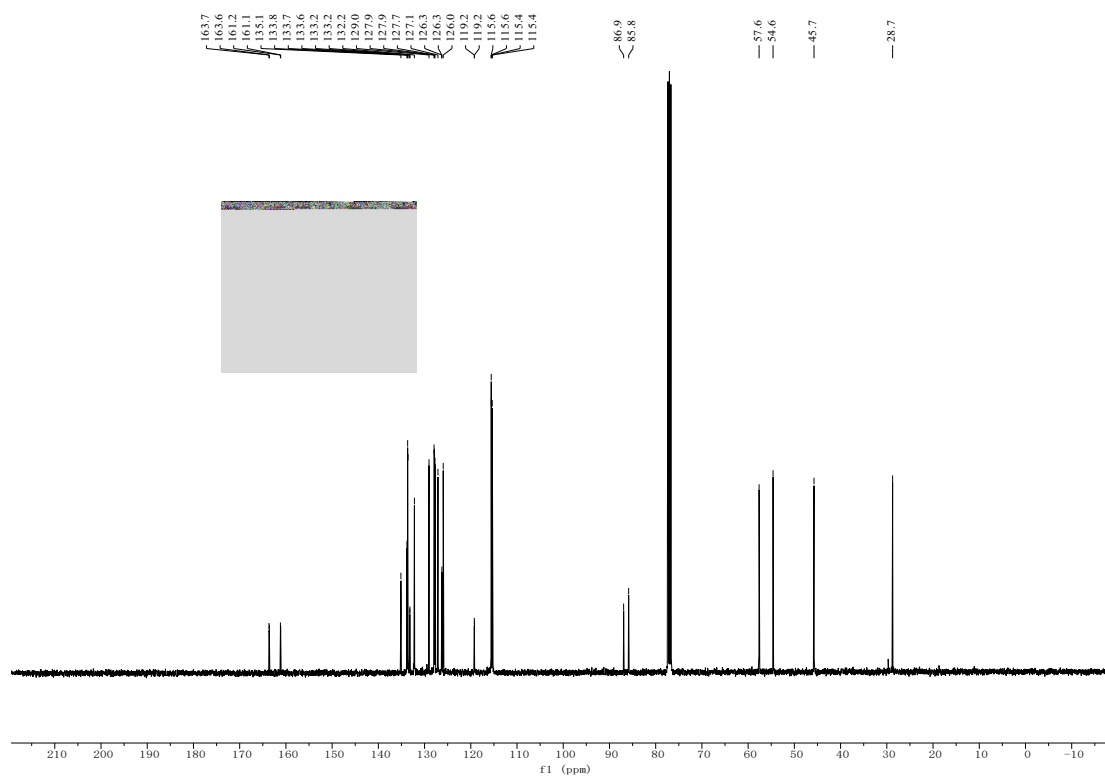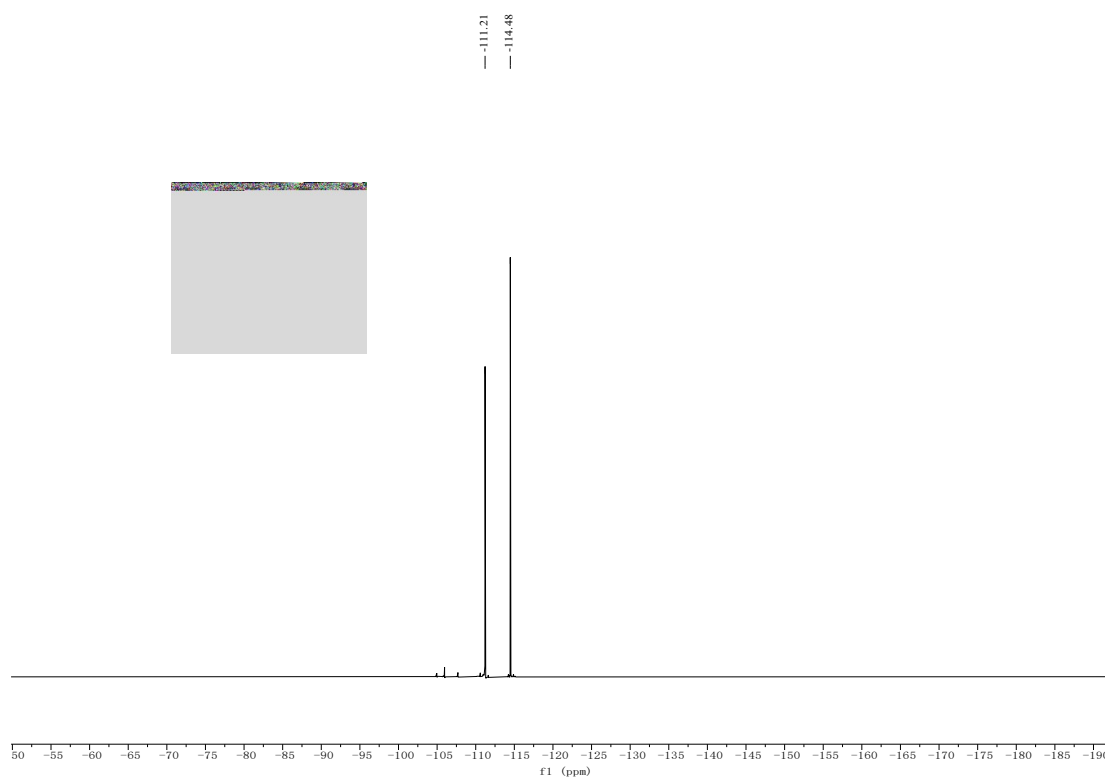

***(E)*-2-(3-(3-fluorophenyl)allyl)-1-((3-fluorophenyl)ethynyl)-6,7-dimethoxy-1,2,3,4-tetrahydroisoquinoline (4k)**

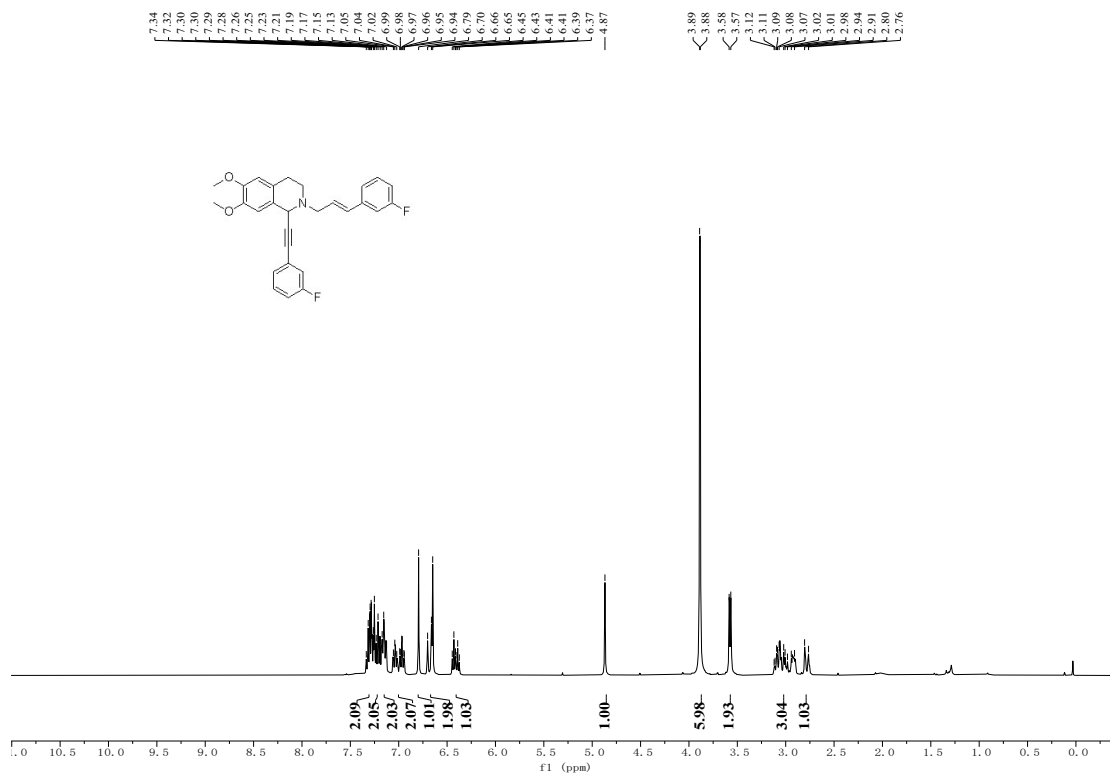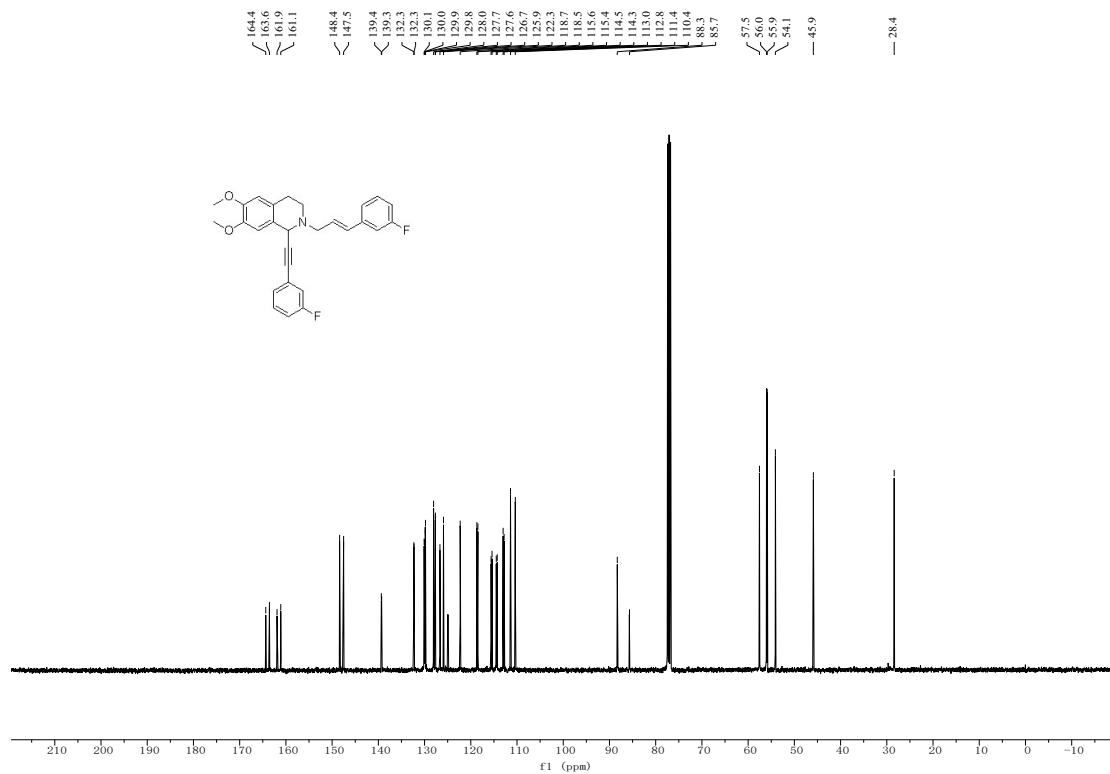

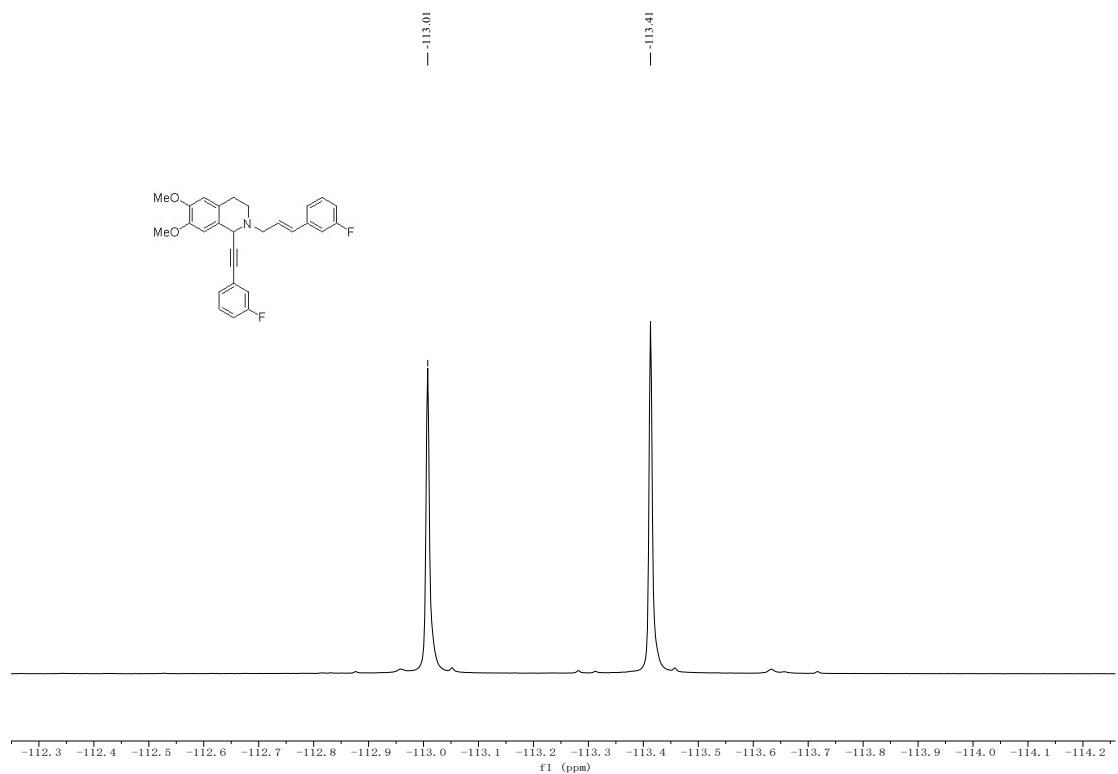

**(E)-2-(3-(2-fluorophenyl)allyl)-1-((2-fluorophenyl)ethynyl)-6,7-dimethoxy-1,2,3,4-tetrahydroisoquinoline (4l)**

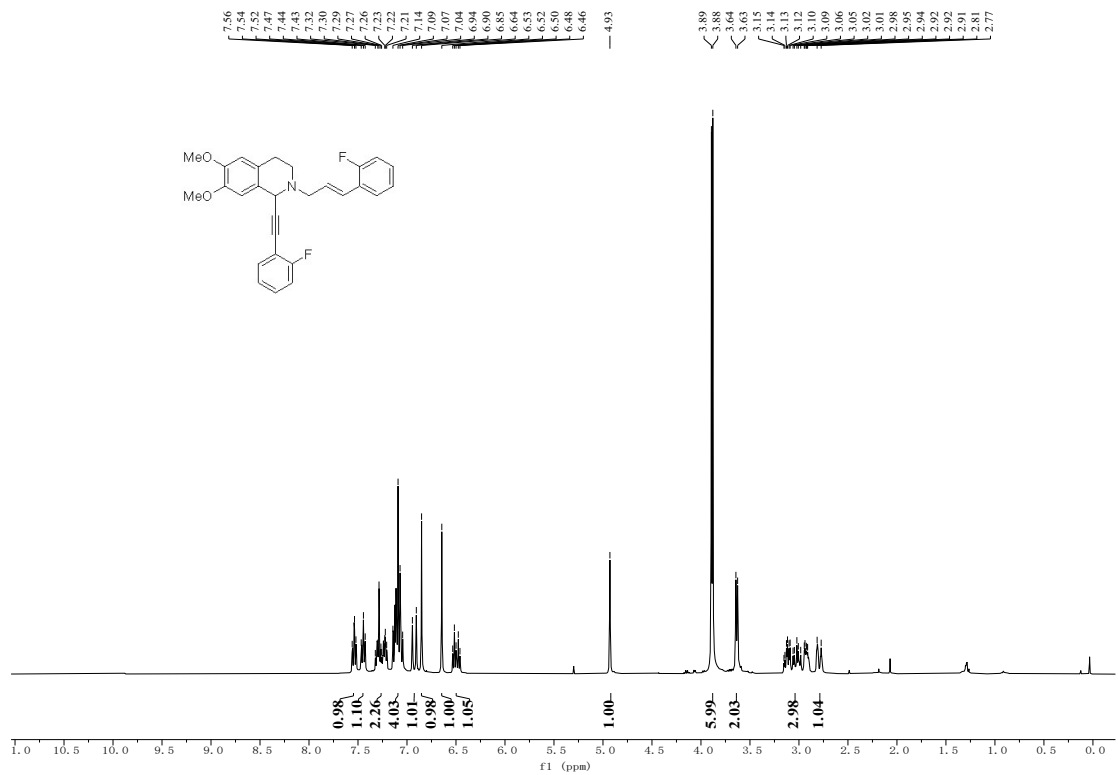



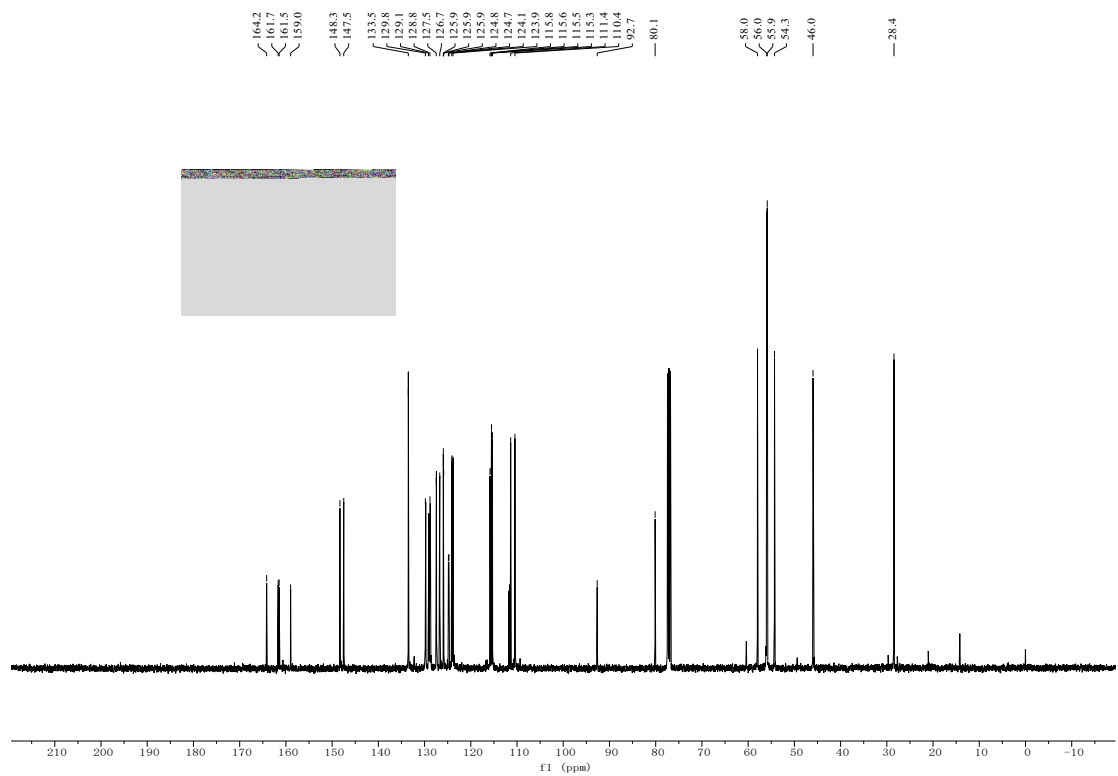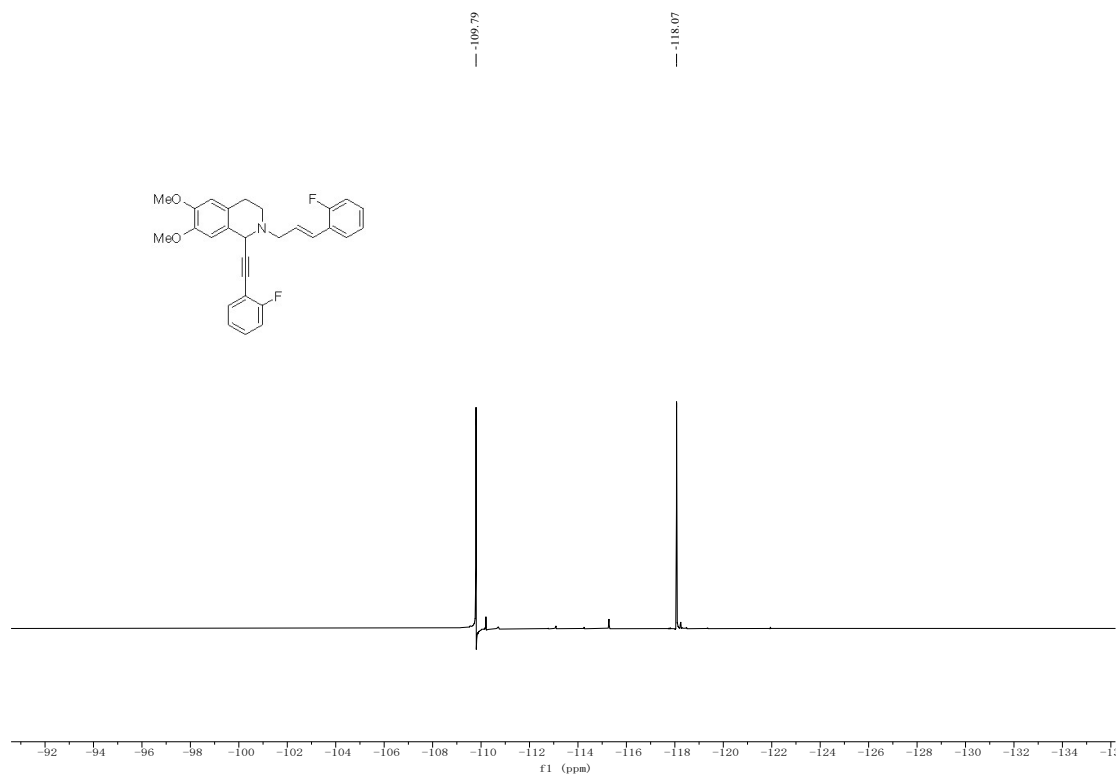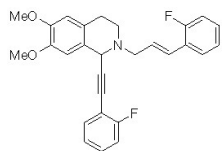

***(E)-2-(3-(4-chlorophenyl)allyl)-1-((4-chlorophenyl)ethynyl)-6,7-dimethoxy-1,2,3,4-tetrahydroisoquinoline (4m)***

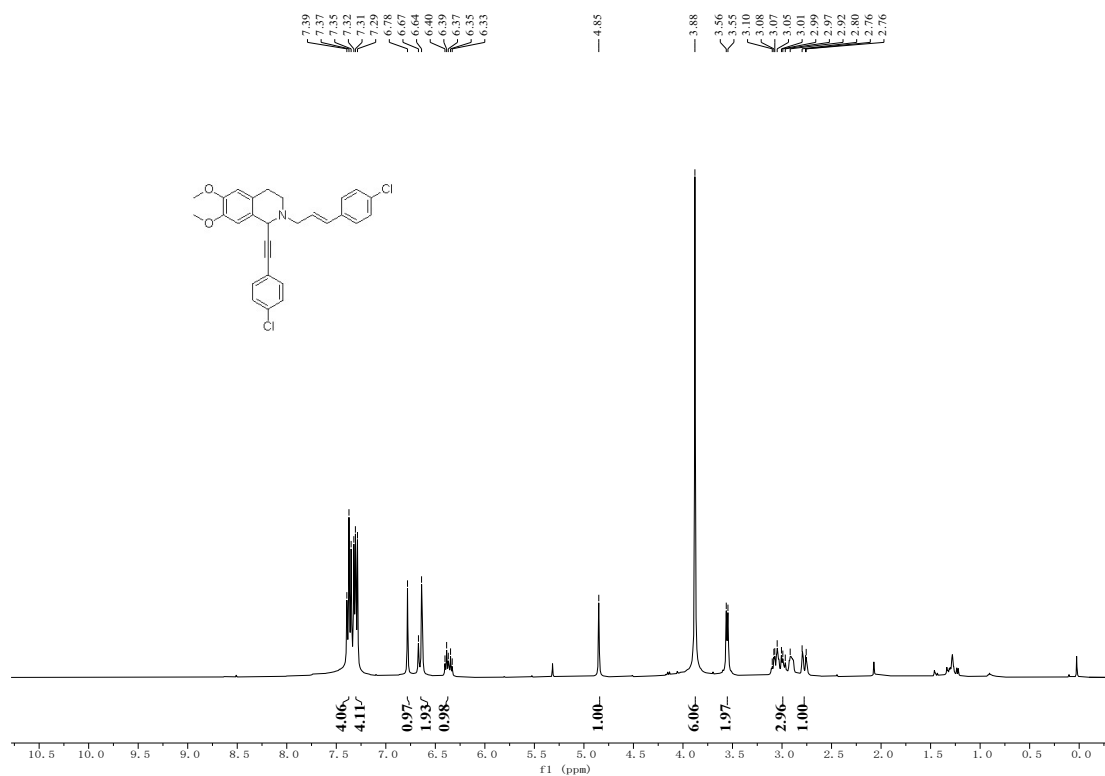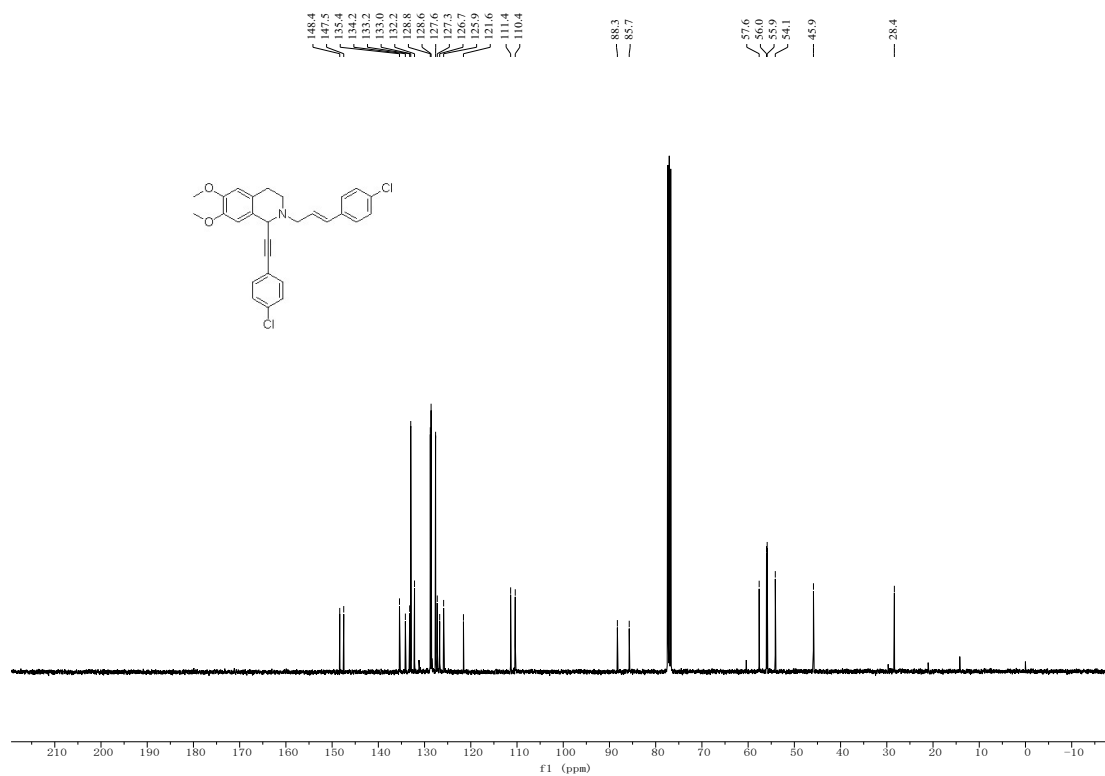

**(E)-2-(3-(3-chlorophenyl)allyl)-1-((3-chlorophenyl)ethynyl)-6,7-dimethoxy-1,2,3,4-tetrahydroisoquinoline (4n)**

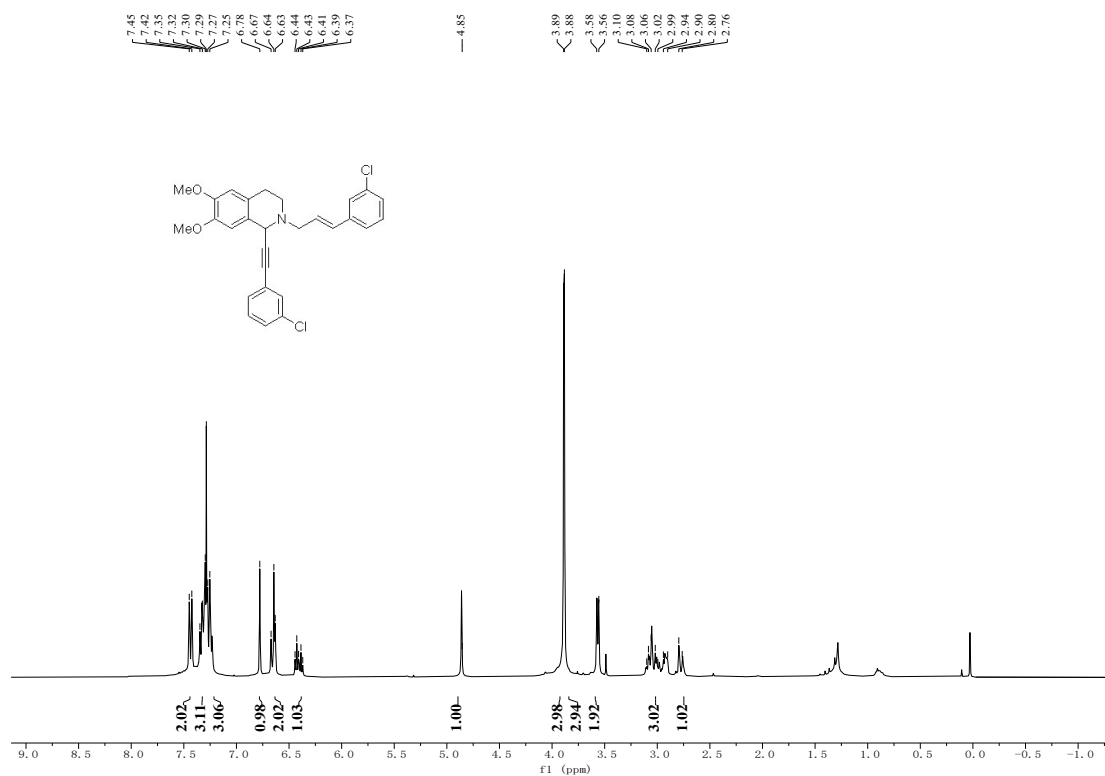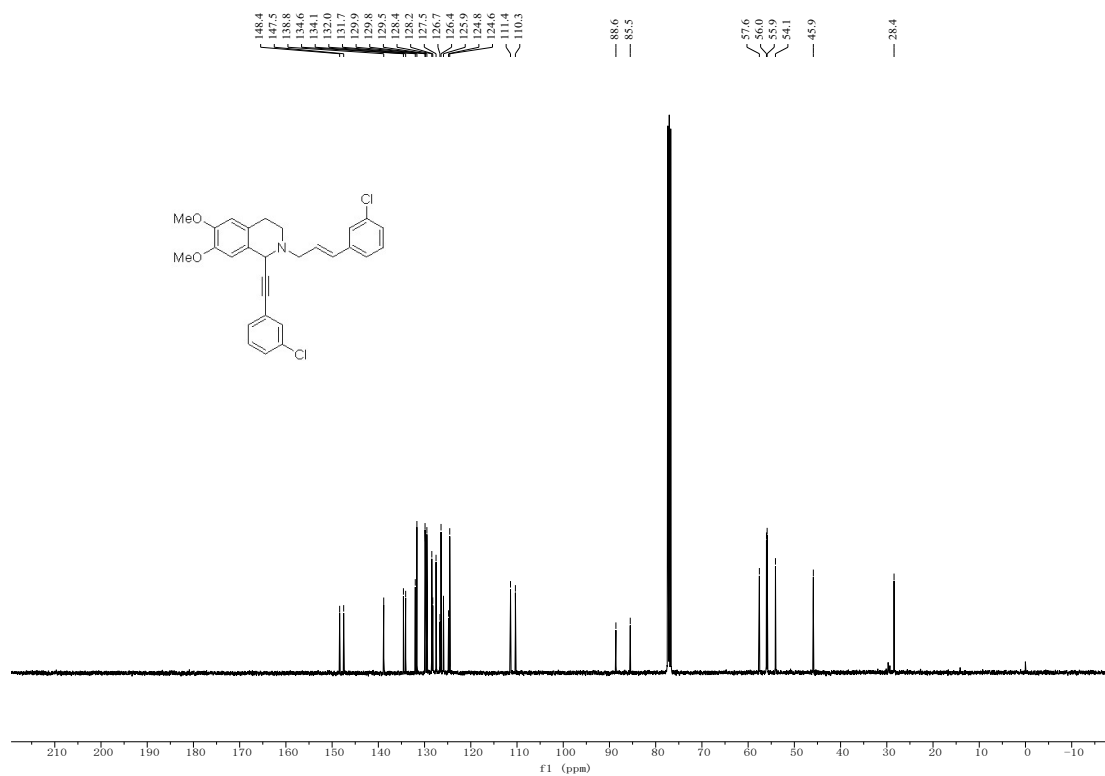

**(E)-2-(3-(2-chlorophenyl)allyl)-1-((2-chlorophenyl)ethynyl)-6,7-dimethoxy-1,2,3,4-tetrahydroisoquinoline (4o)**

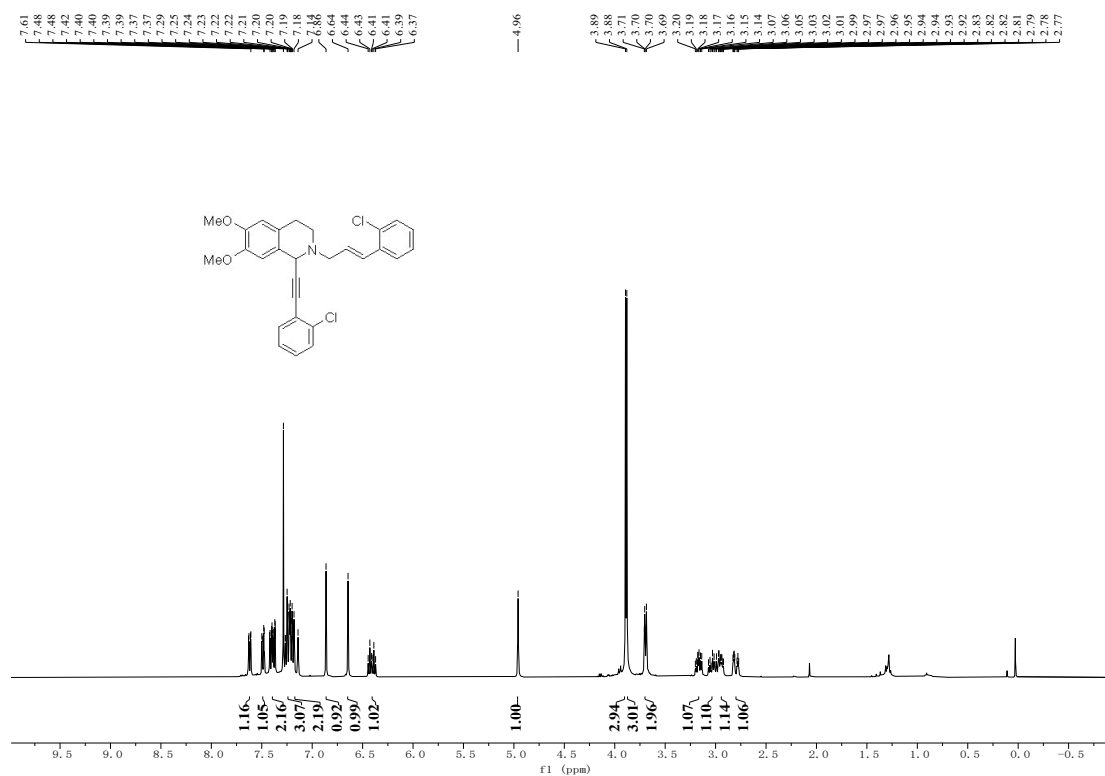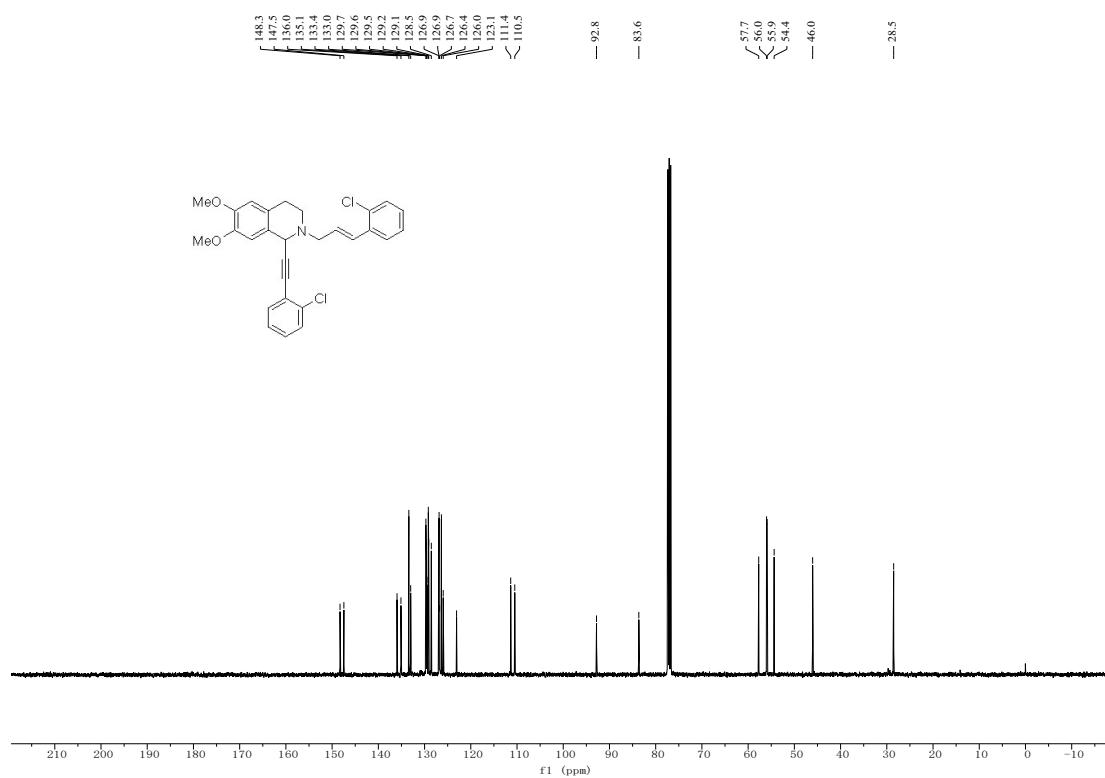

**(E)-2-(3-(4-bromophenyl)allyl)-1-((4-bromophenyl)ethynyl)-6,7-dimethoxy-1,2,3,4-tetrahydroisoquinoline (4p)**

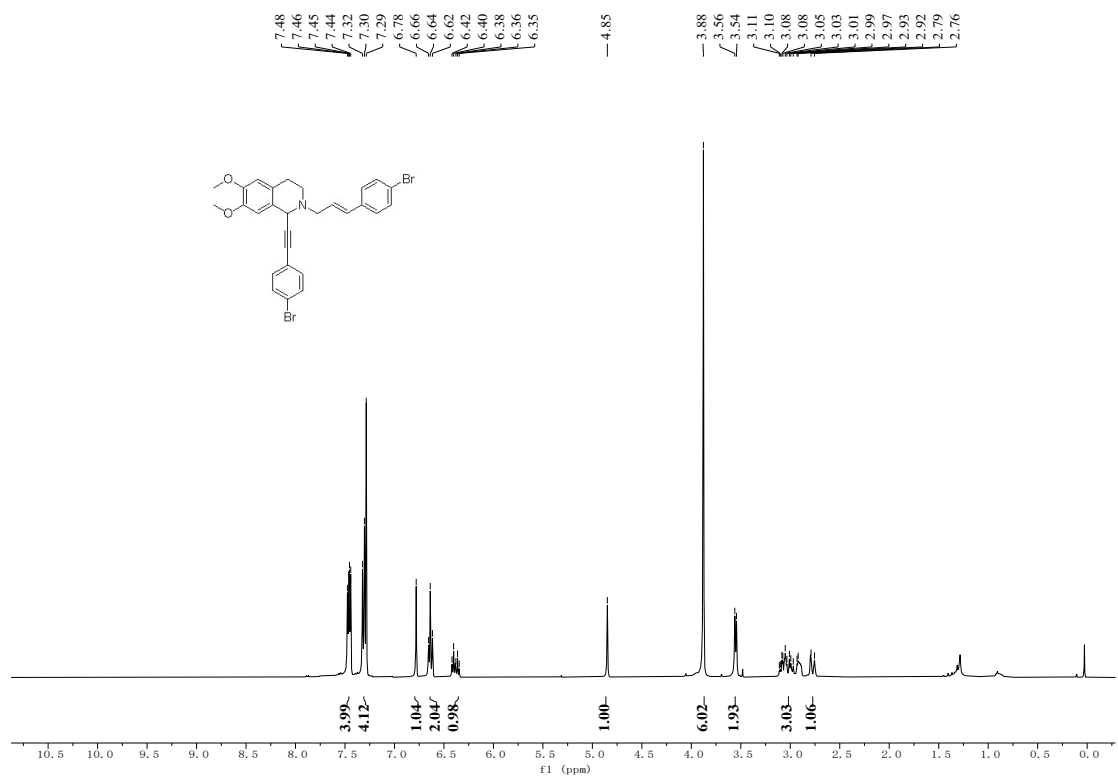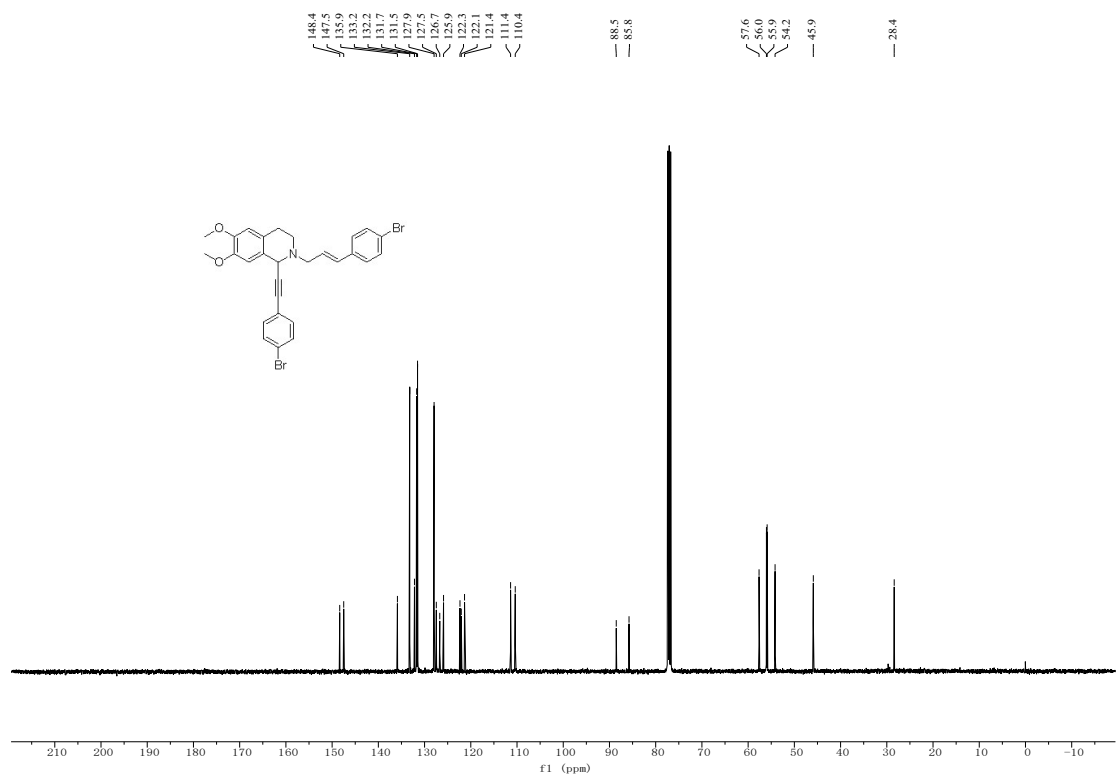

***(E)-2-(3-(3-bromophenyl)allyl)-1-((3-bromophenyl)ethynyl)-6,7-dimethoxy-1,2,3,4-tetrahydroisoquinoline (4q)***

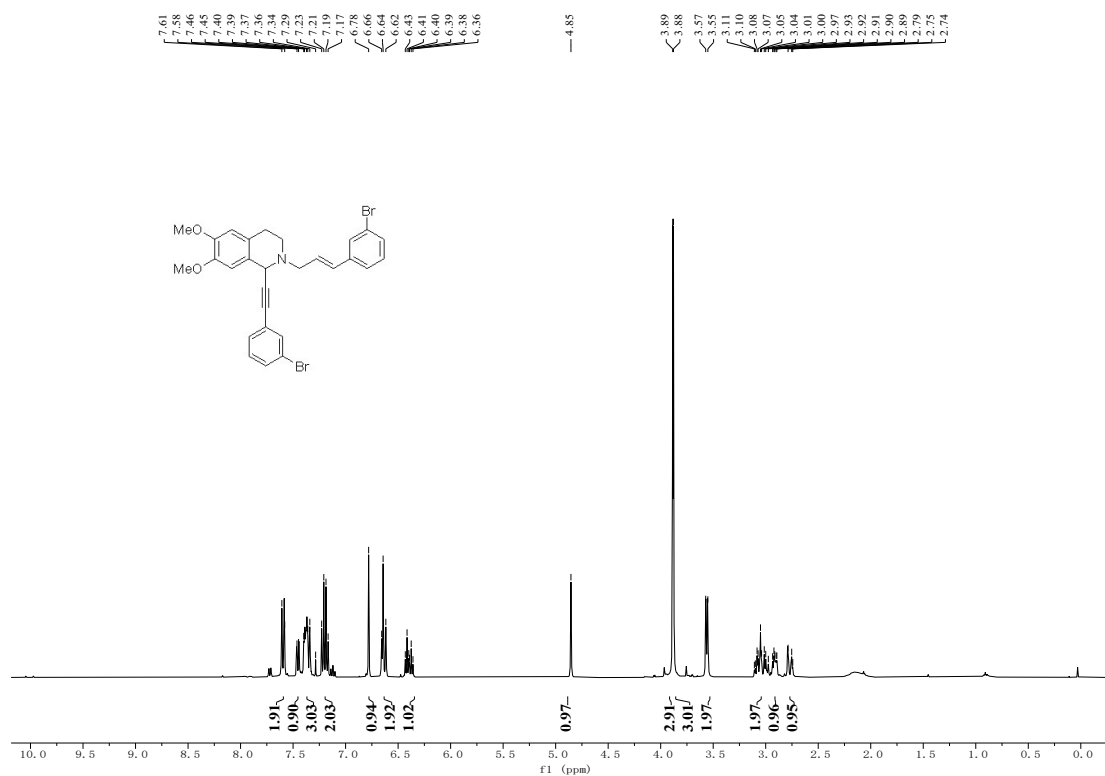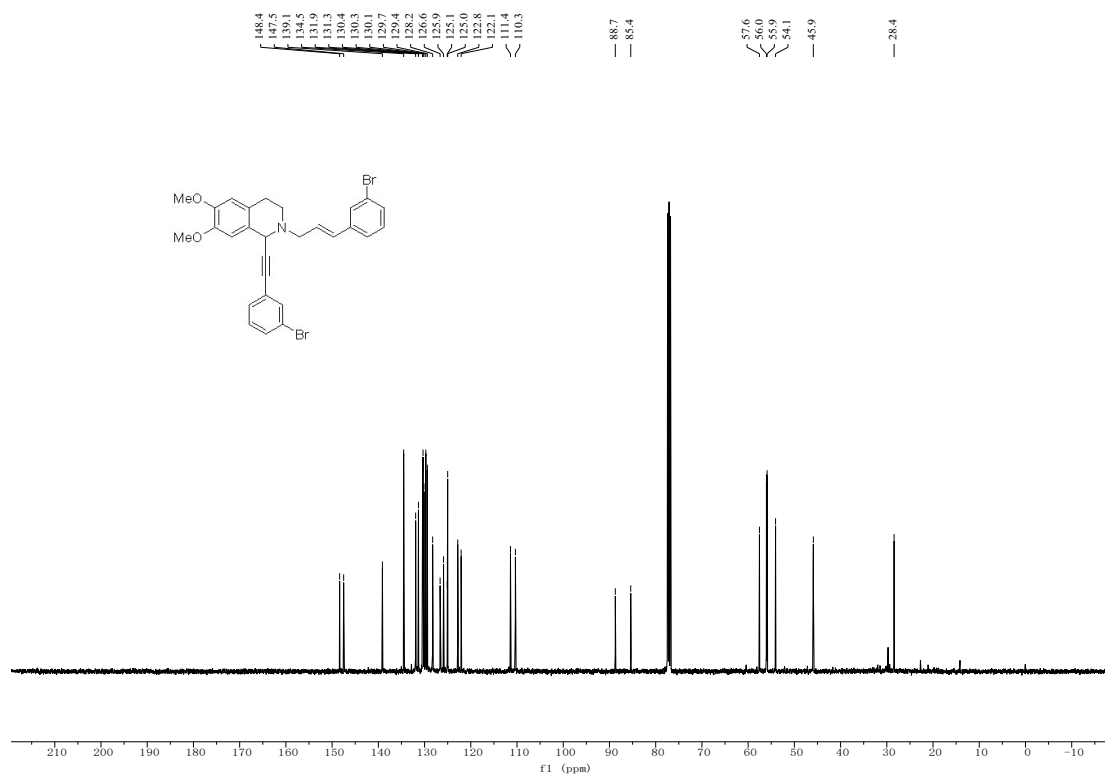

**(E)-4-((2-(3-(4-cyanophenyl)allyl)-6,7-dimethoxy-1,2,3,4-tetrahydroisoquinolin-1-yl)ethynyl)benzonitrile (4r)**

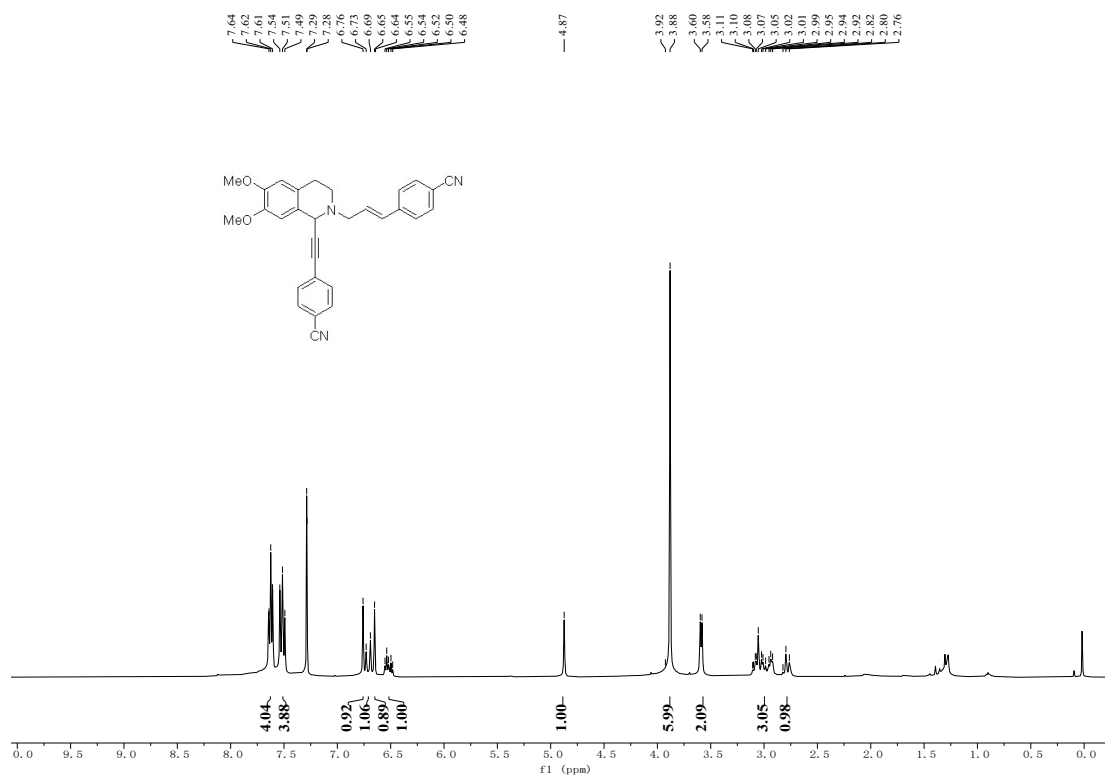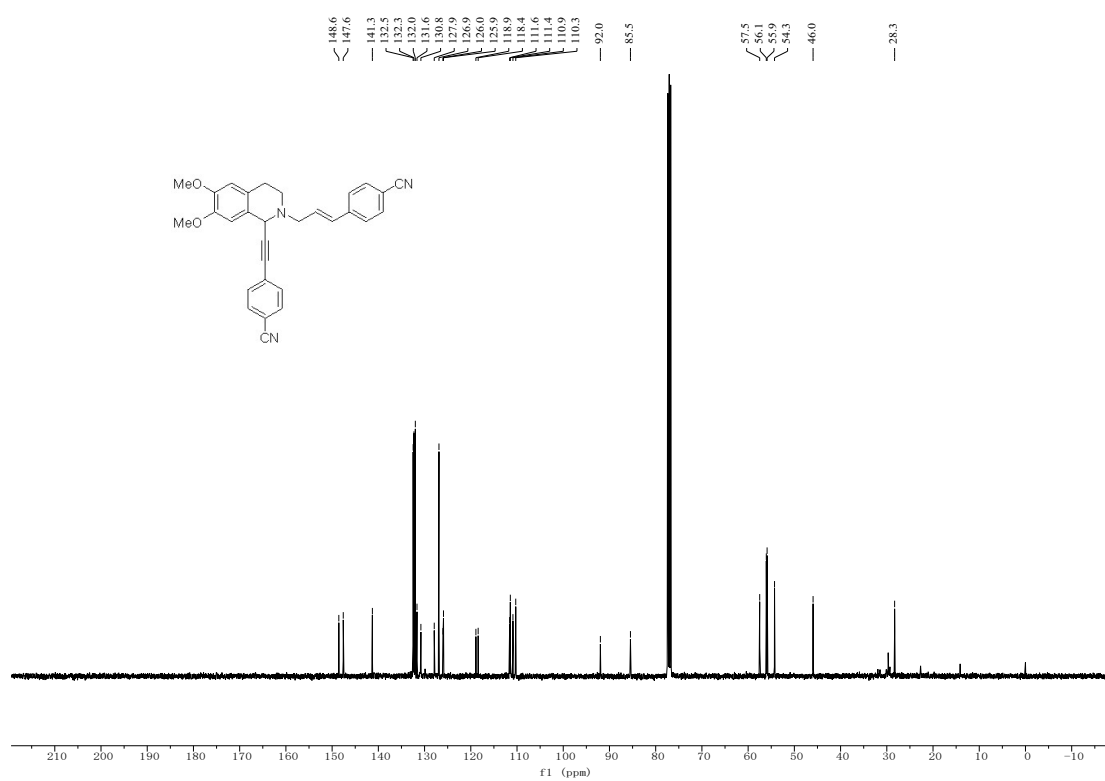

**2-cinnamyl-6,7-dimethoxy-1-(phenylethynyl)-1,2,3,4-tetrahydroisoquinoline (4s)**

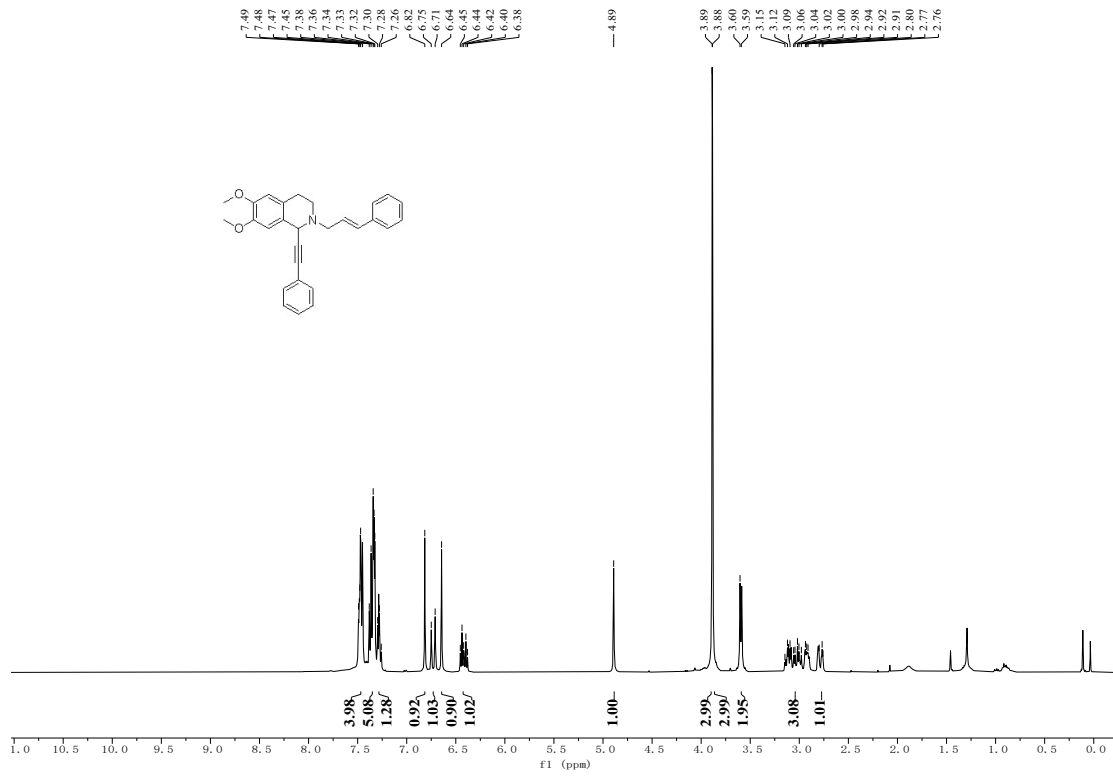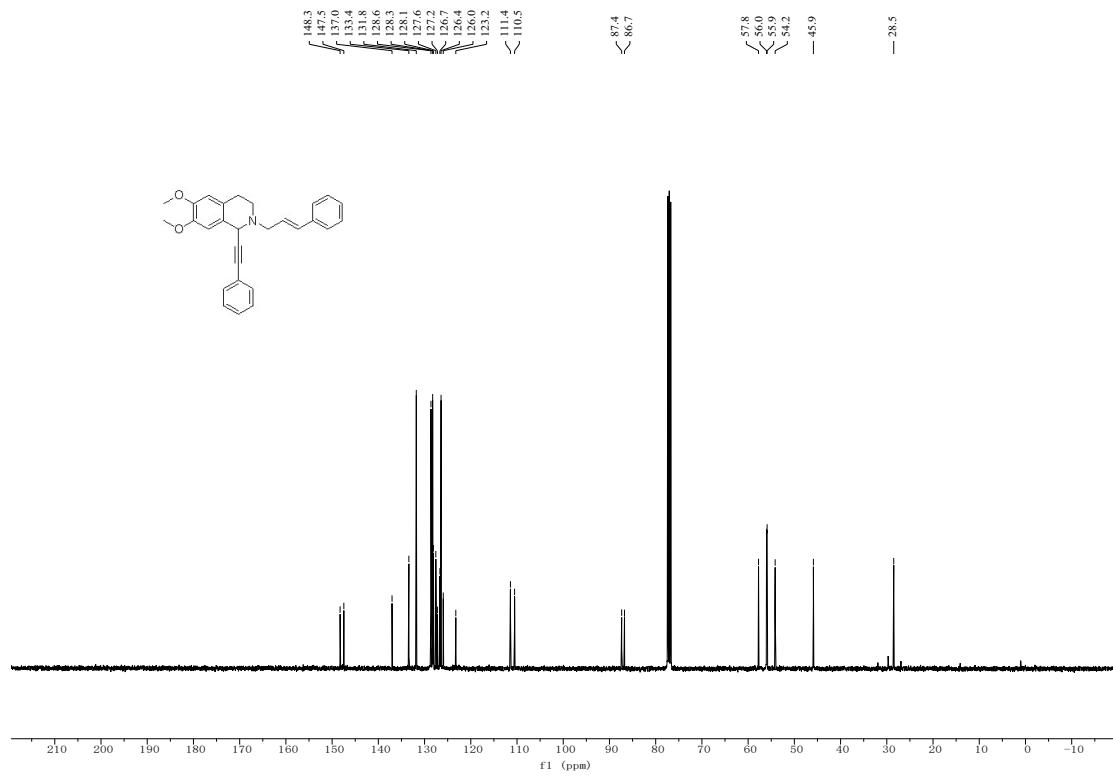



**(E)-6,7-dimethoxy-2-(3-(4-(trifluoromethyl)phenyl)allyl)-1-(4-(trifluoromethyl)phenyl)ethynyl-1,2,3,4-tetrahydroisoquinoline (4t)**

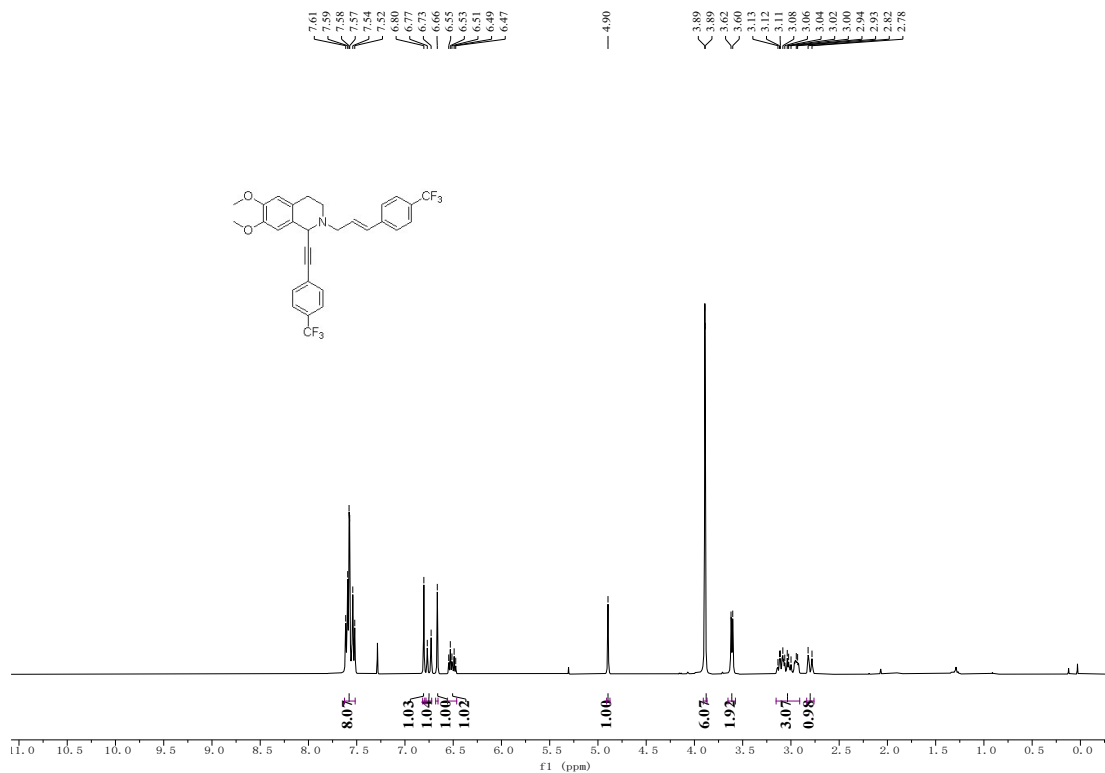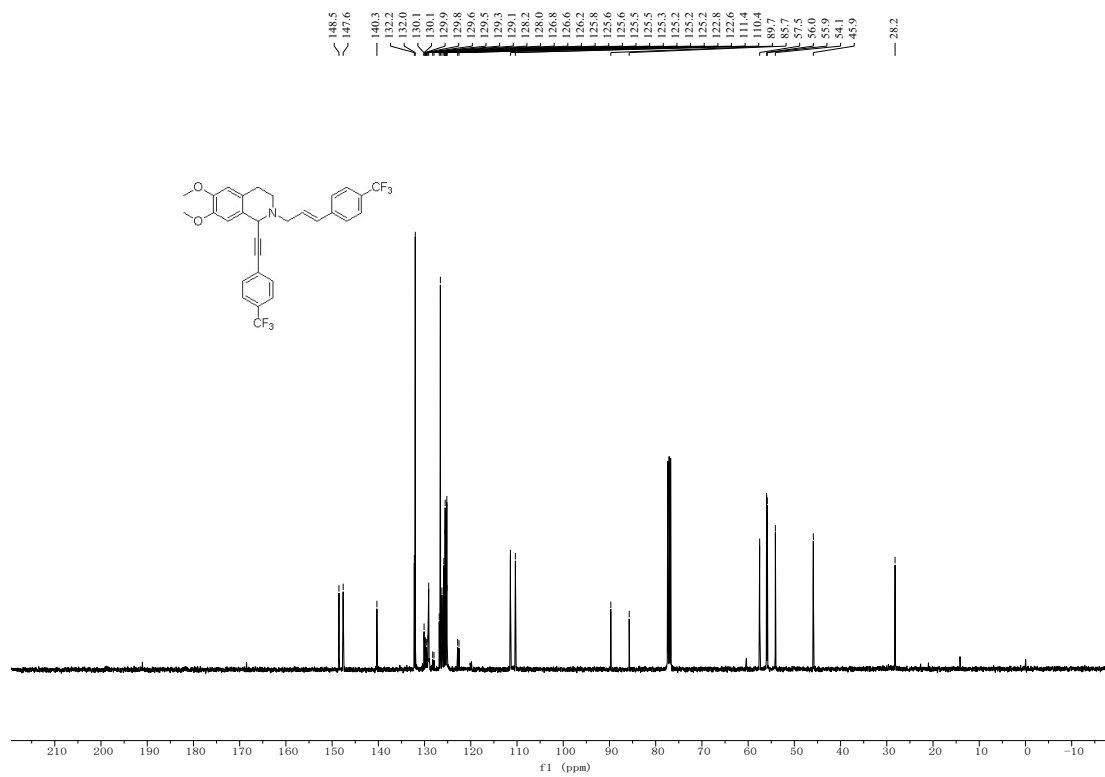

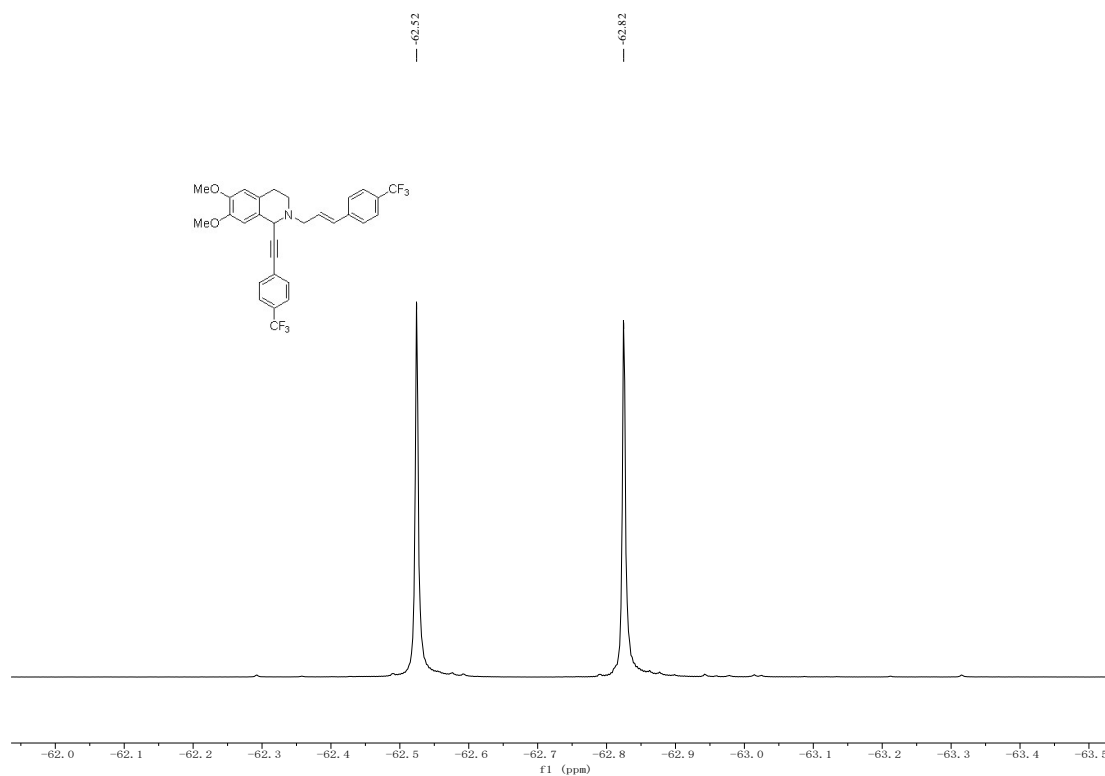

***(E)-6,7-dimethoxy-2-(3-(3-(trifluoromethyl)phenyl)allyl)-1-(3-(trifluoromethyl)phenyl)ethynyl-1,2,3,4-tetrahydroisoquinoline (4u)***

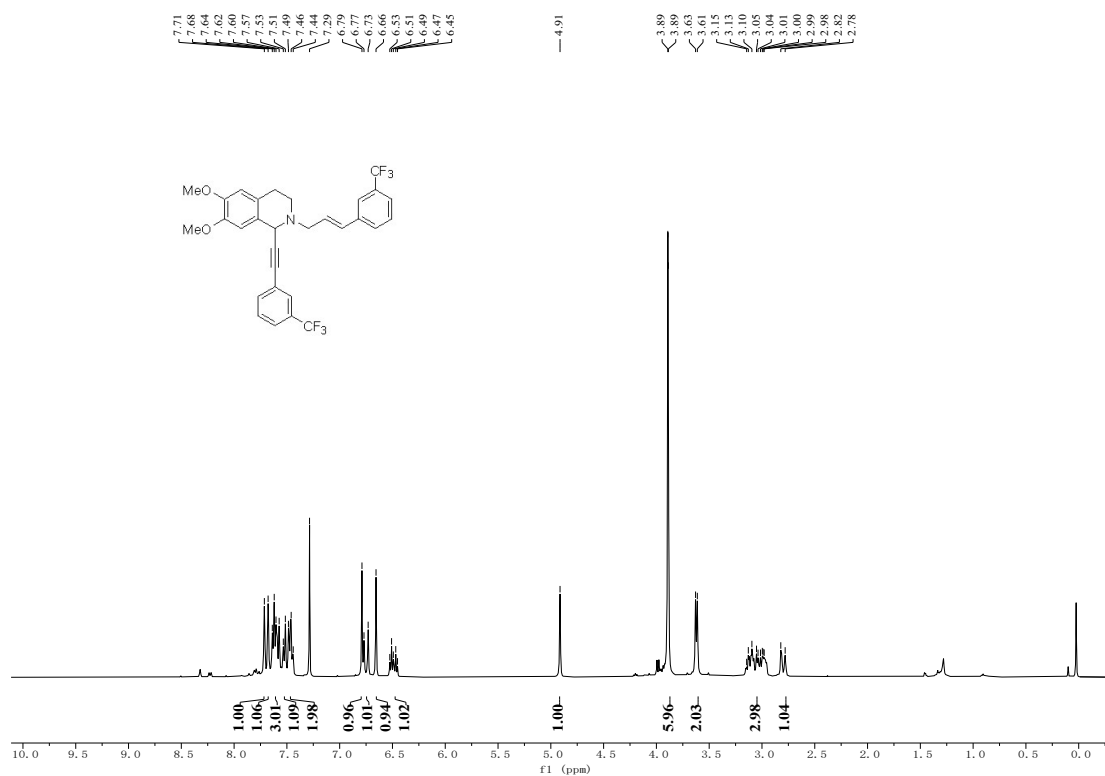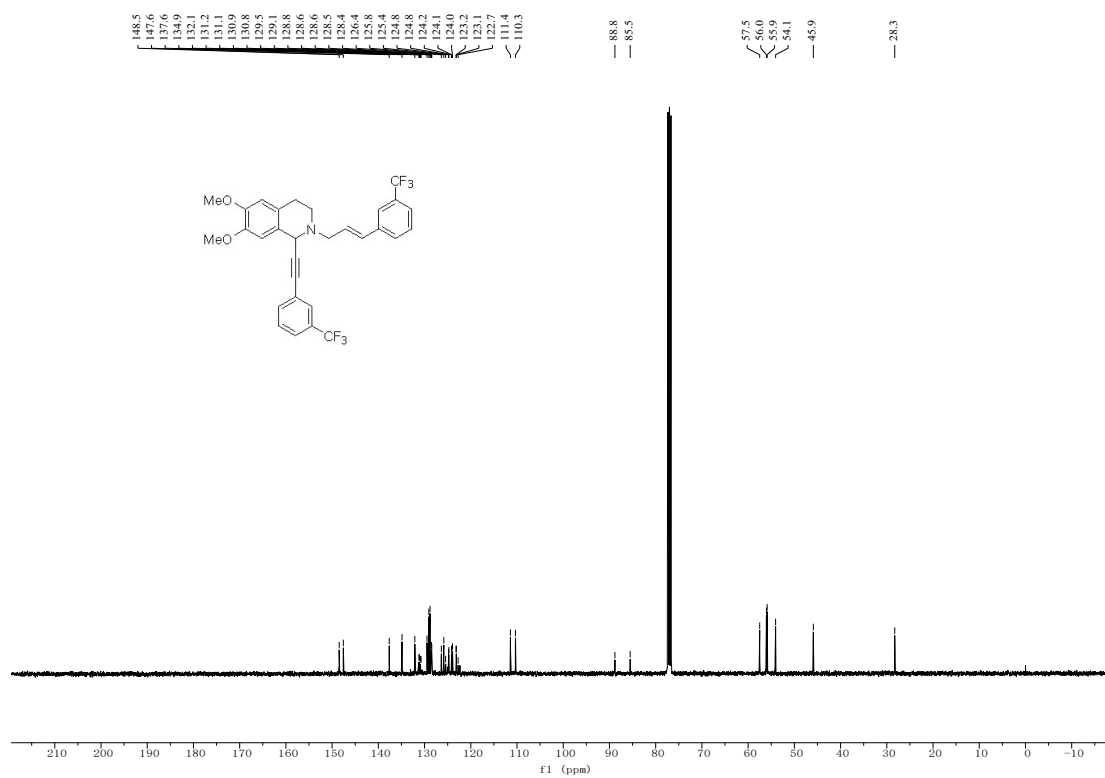

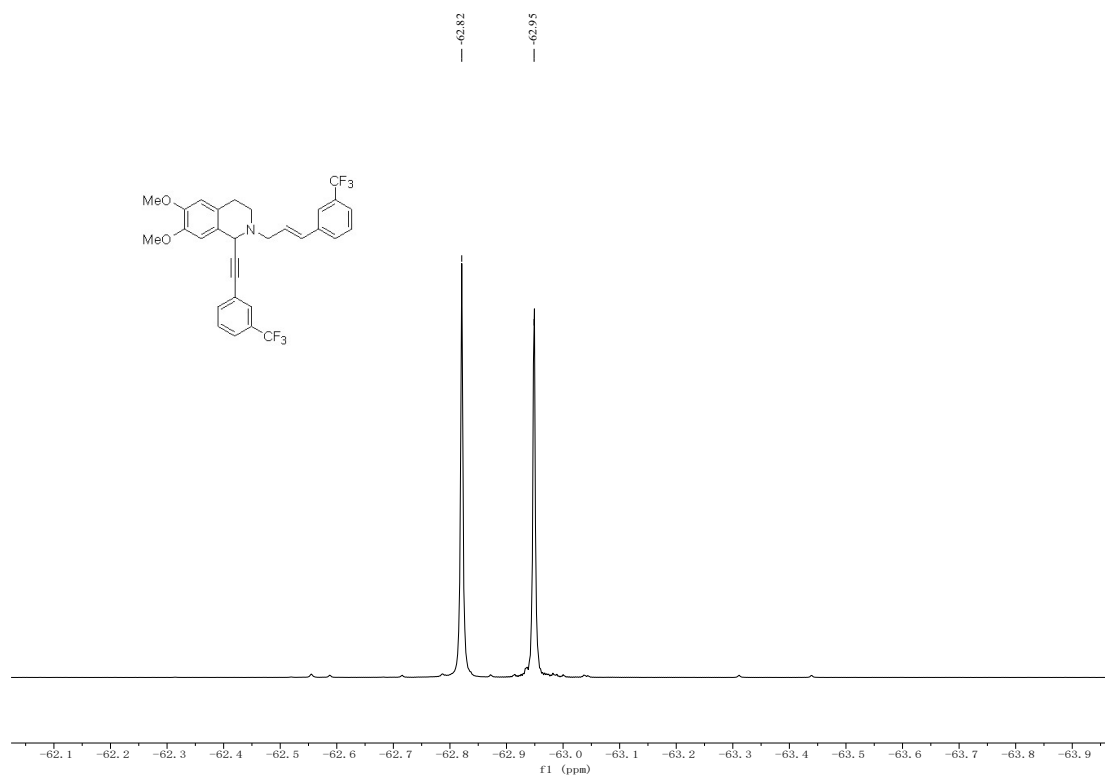

***(E)-6,7-dimethoxy-2-(3-(2-(trifluoromethyl)phenyl)allyl)-1-((2-(trifluoromethyl)phenyl)ethynyl)-1,2,3,4-tetrahydroisoquinoline (4v)***

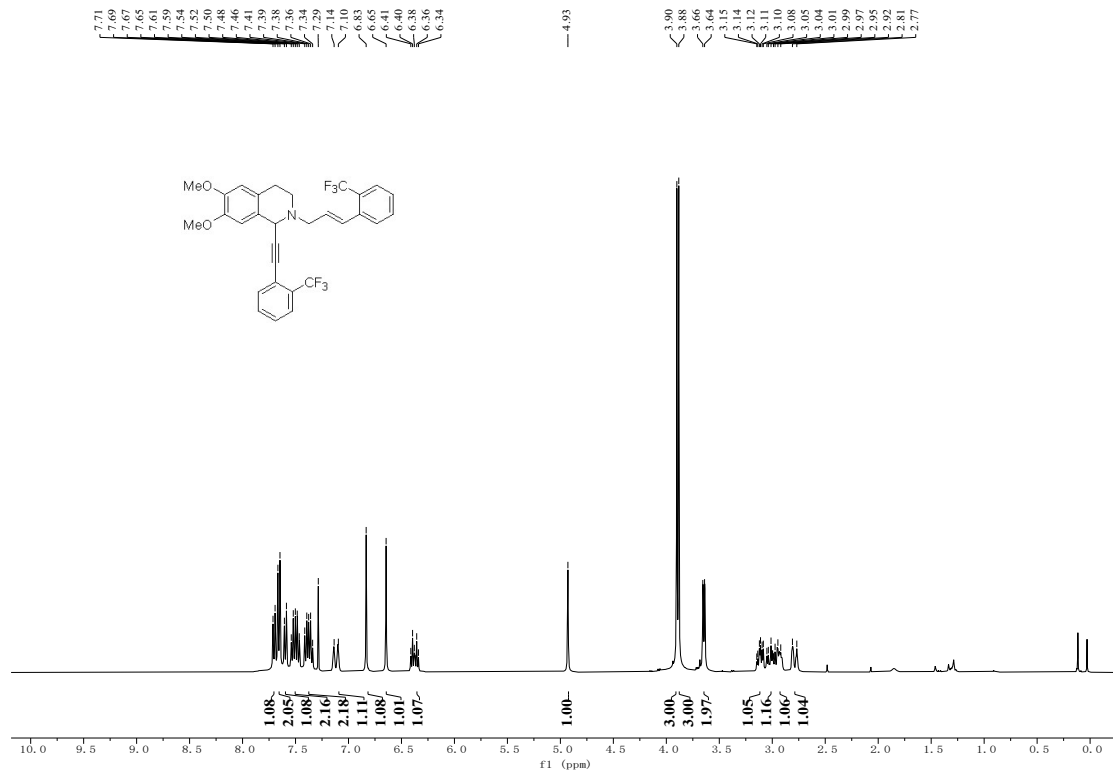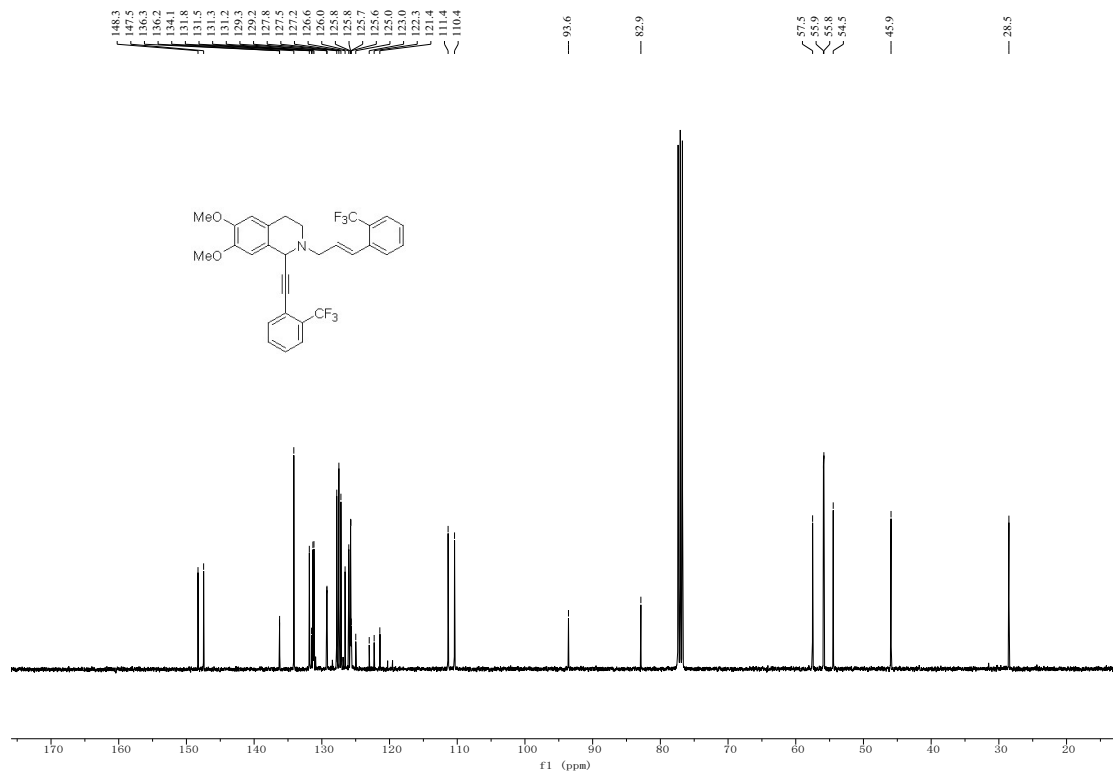

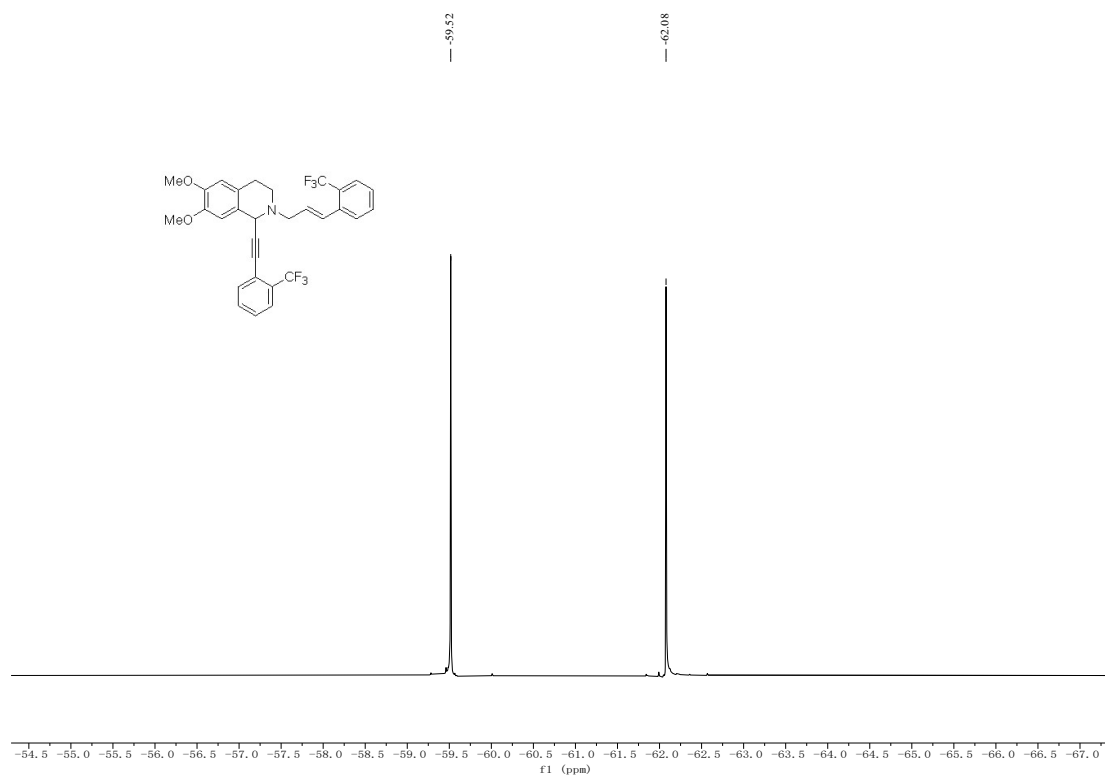

***(E)*-6,7-dimethoxy-2-(3-(*m*-tolyl)allyl)-1-(*m*-tolylethynyl)-1,2,3,4-tetrahydroisoquinoline (4w)**

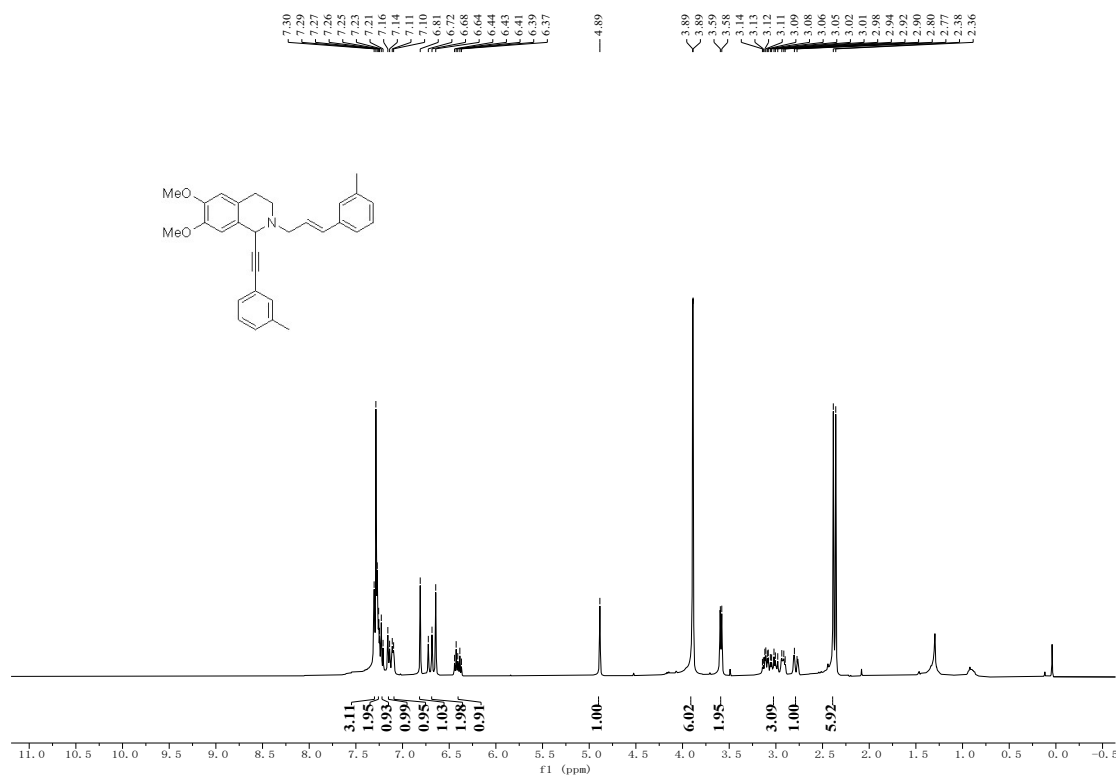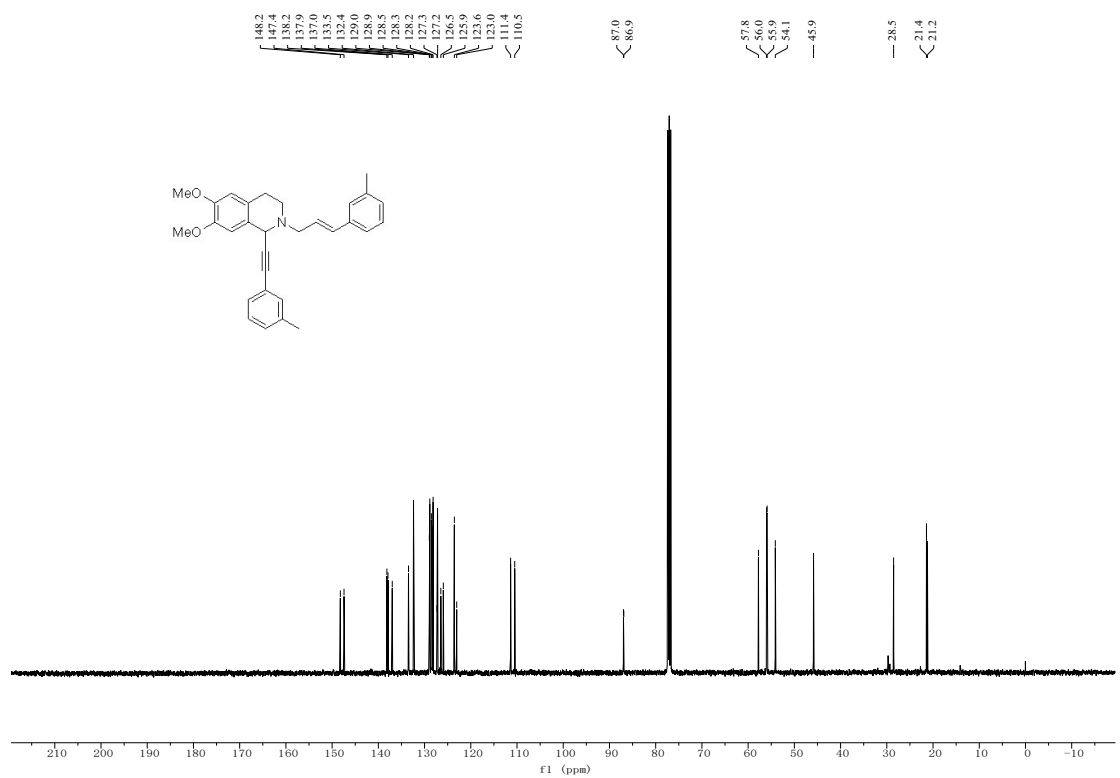

***(E)*-6,7-dimethoxy-2-(3-(*o*-tolyl)allyl)-1-(*o*-tolylethynyl)-1,2,3,4-tetrahydroisoquinoline (4x)**

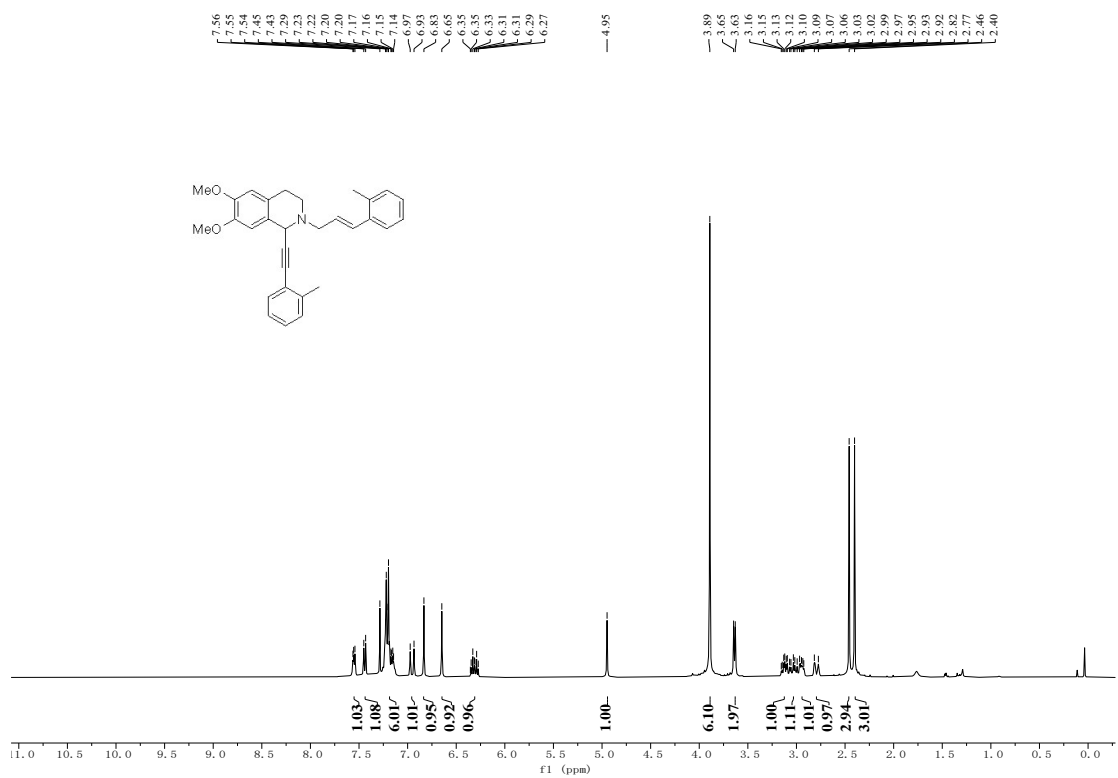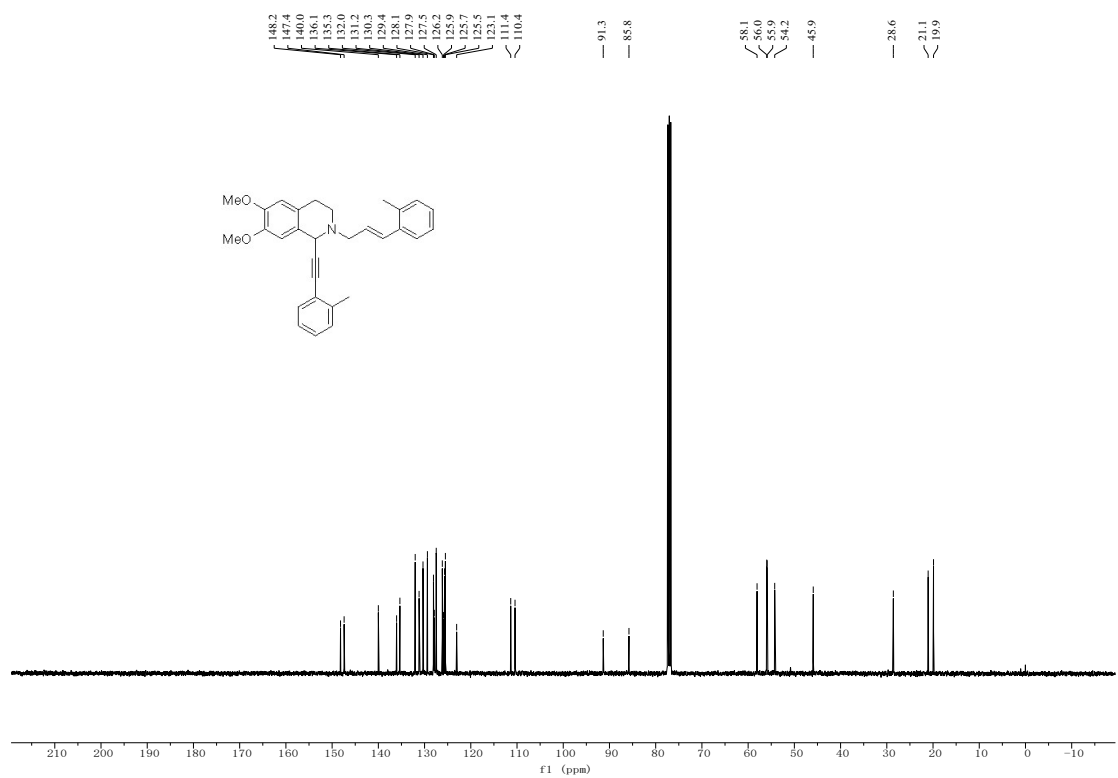

***(E)*-6,7-dimethoxy-2-(3-(3-methoxyphenyl)allyl)-1-((3-methoxyphenyl)ethynyl)-1,2,3,4-tetrahydroisoquinoline (4y)**



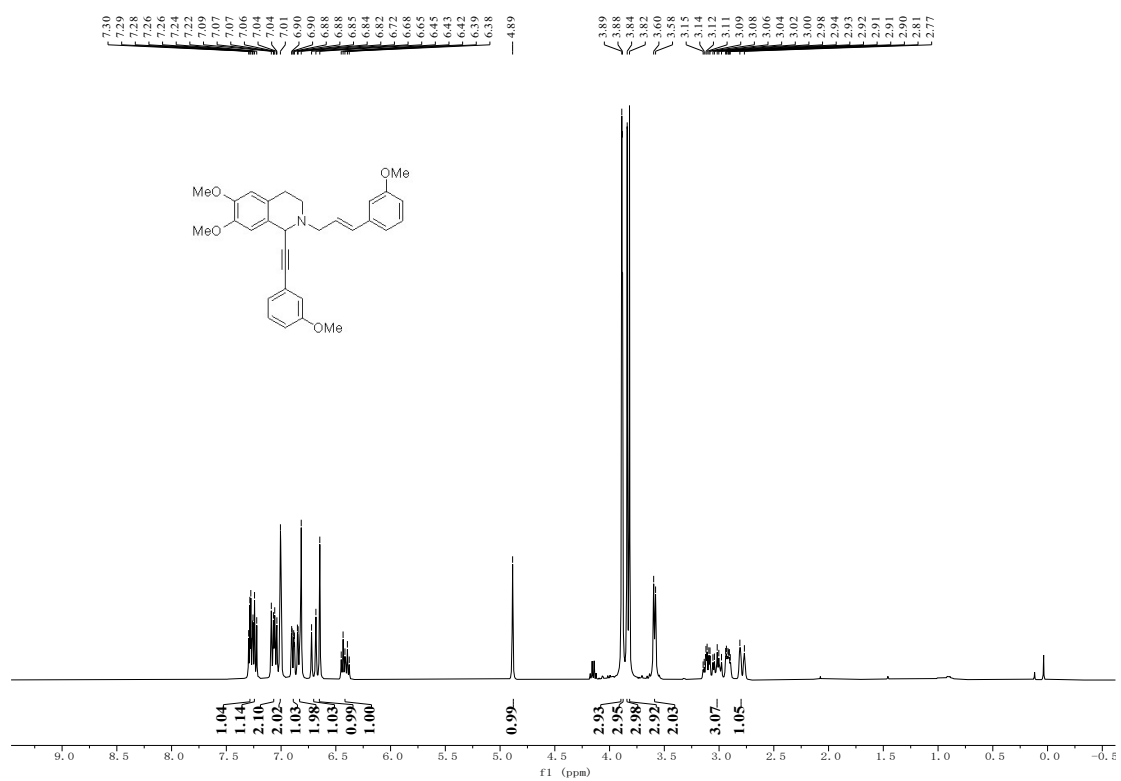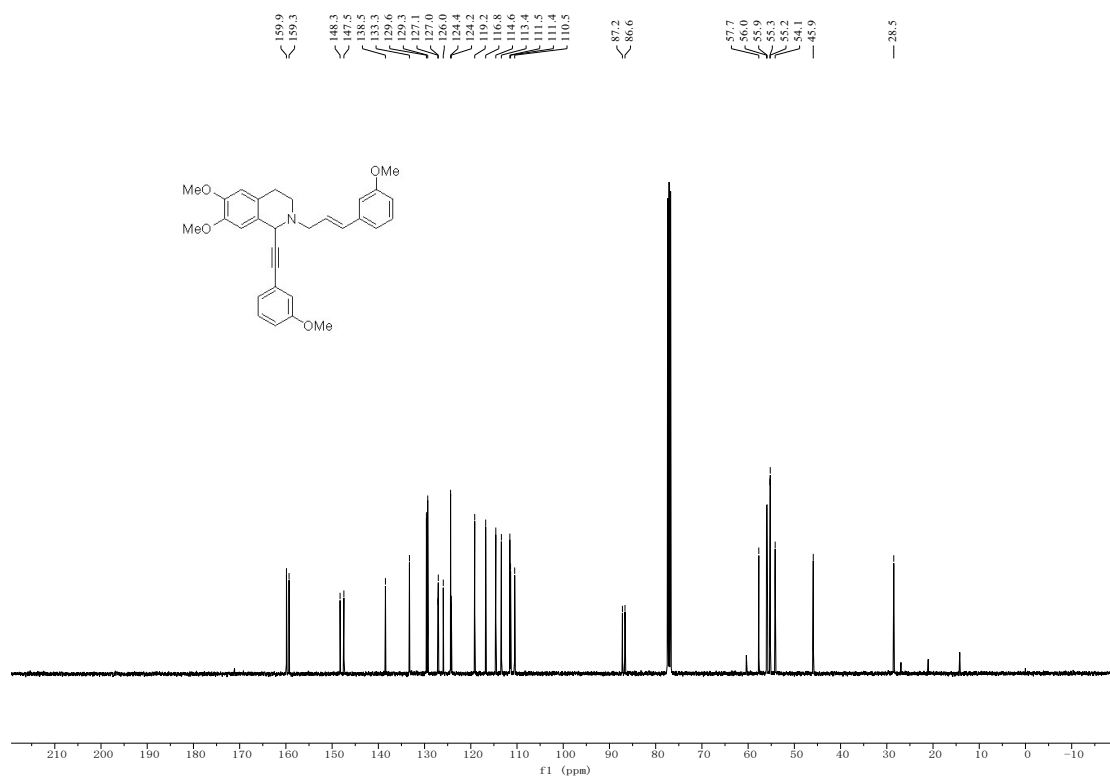

***(E)*-2-(hept-2-en-1-yl)-1-(hex-1-yn-1-yl)-6,7-dimethoxy-1,2,3,4-tetrahydroisoquinoline(4z)**

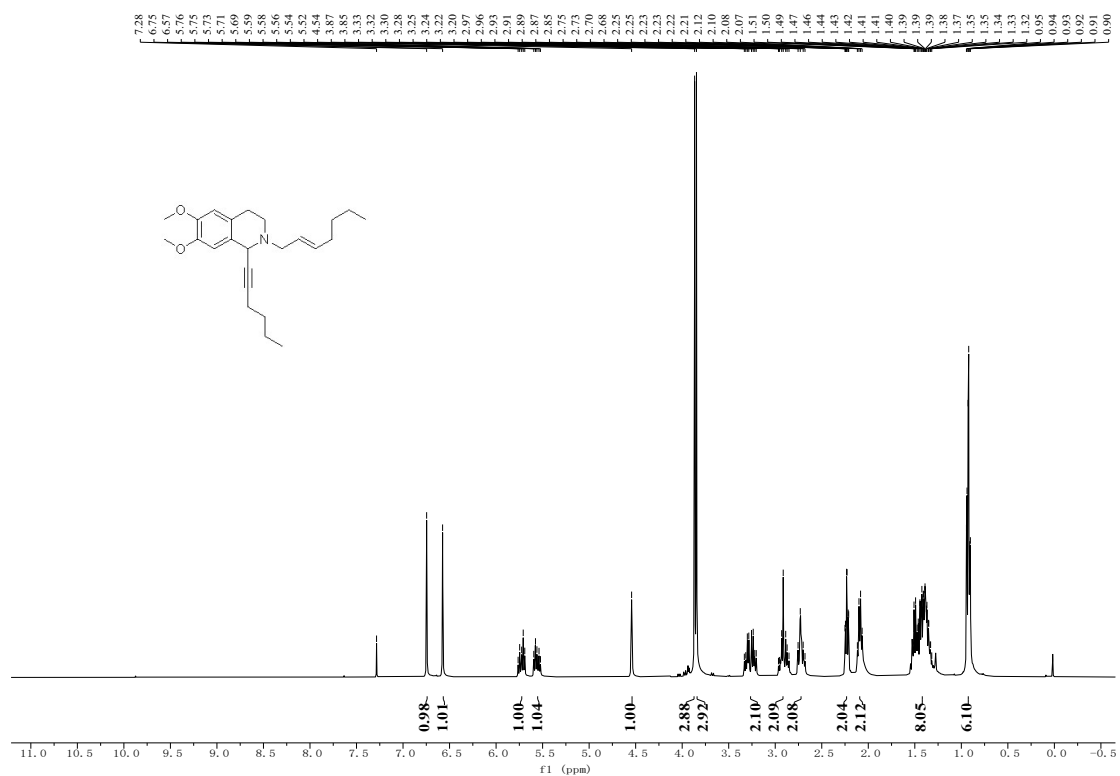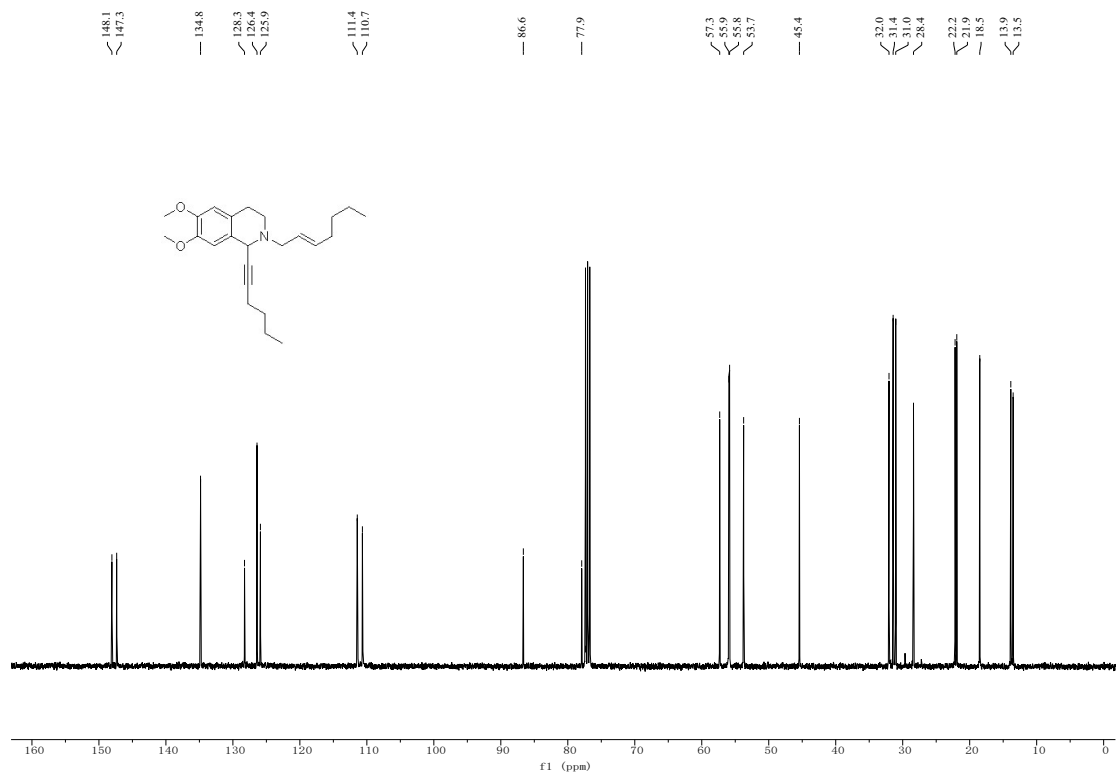

**2-(3-(4-fluorophenyl)prop-2-yn-1-yl)-6,7-dimethoxy-1,2,3,4-tetrahydroisoquinoline(5a)**

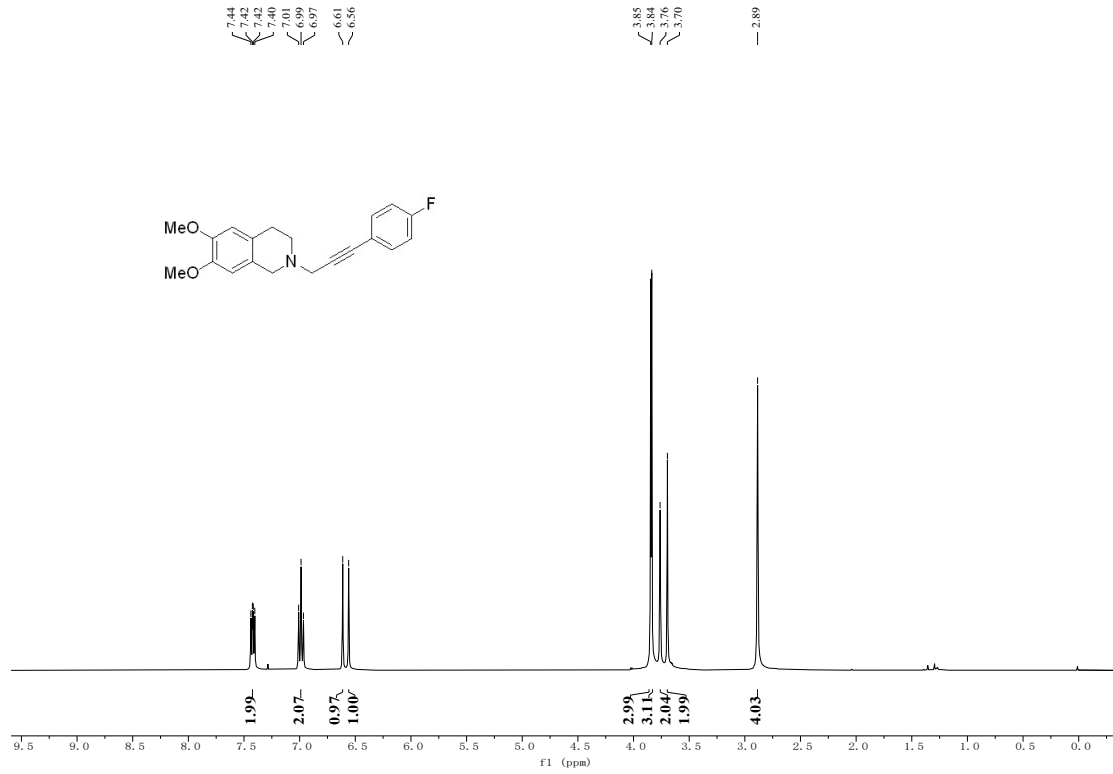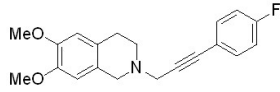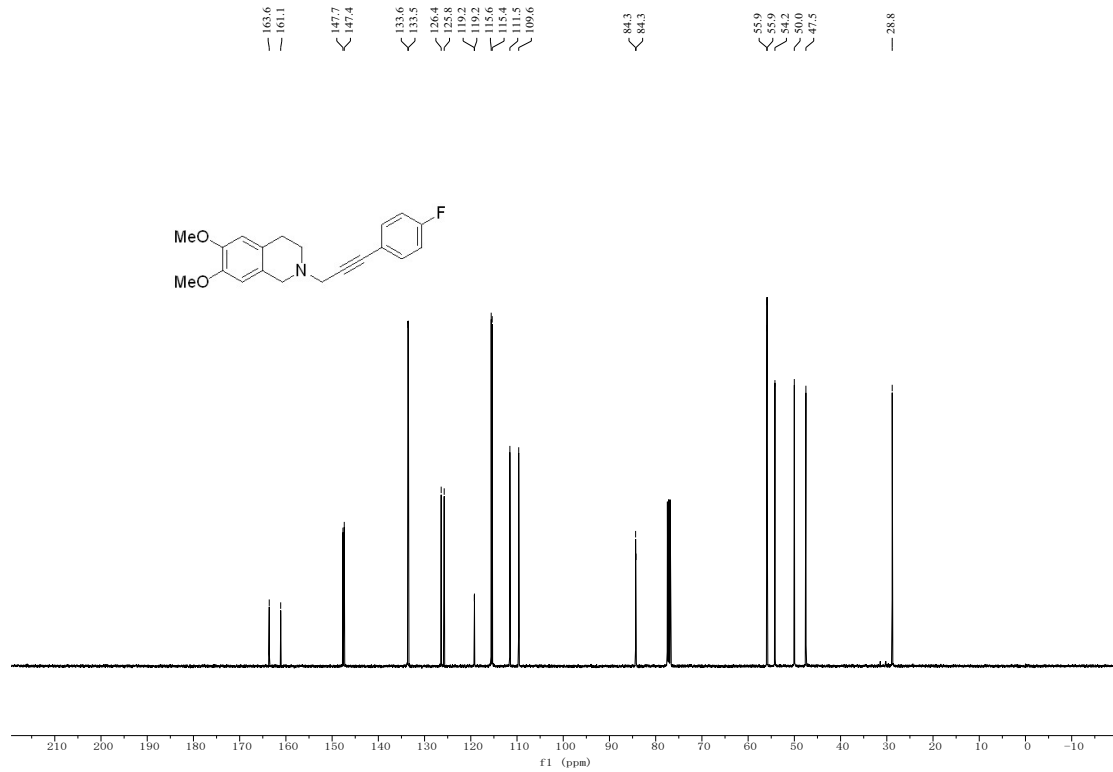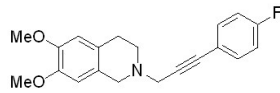

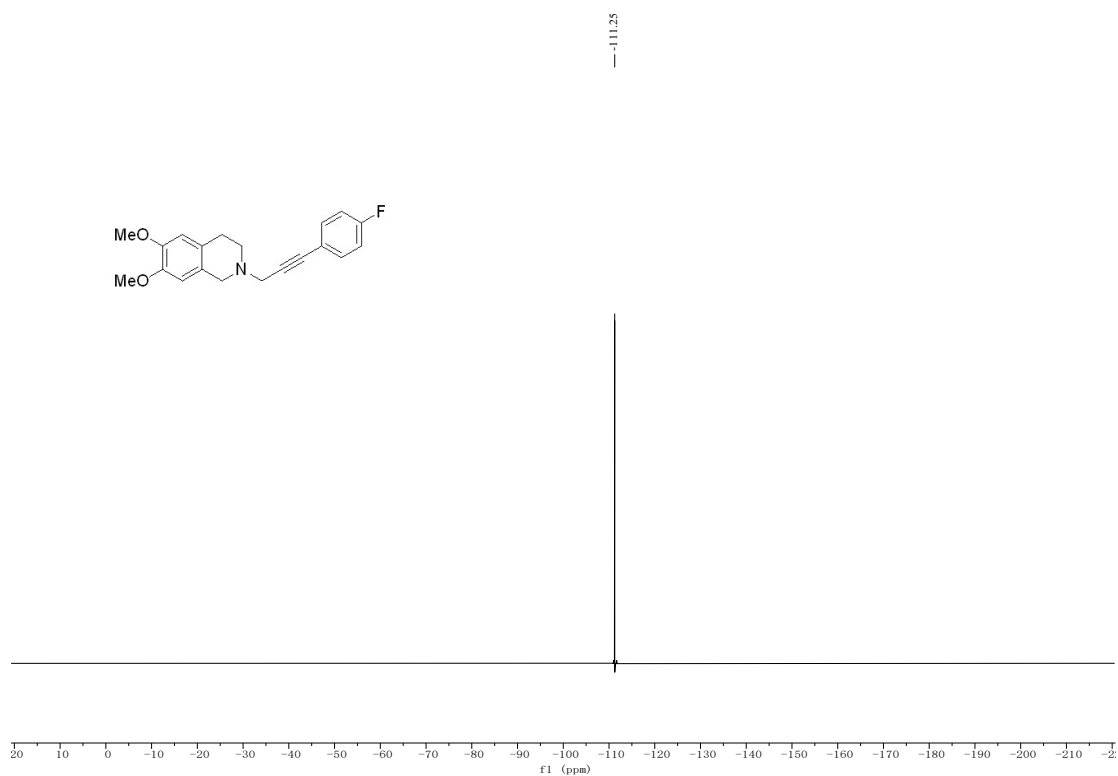

***N*-(3,4-dimethoxyphenethyl)-3-(4-fluorophenyl)-*N*-(3-(4-fluorophenyl)prop-2-yn-1-yl)prop-2-yn-1-amine(6)**

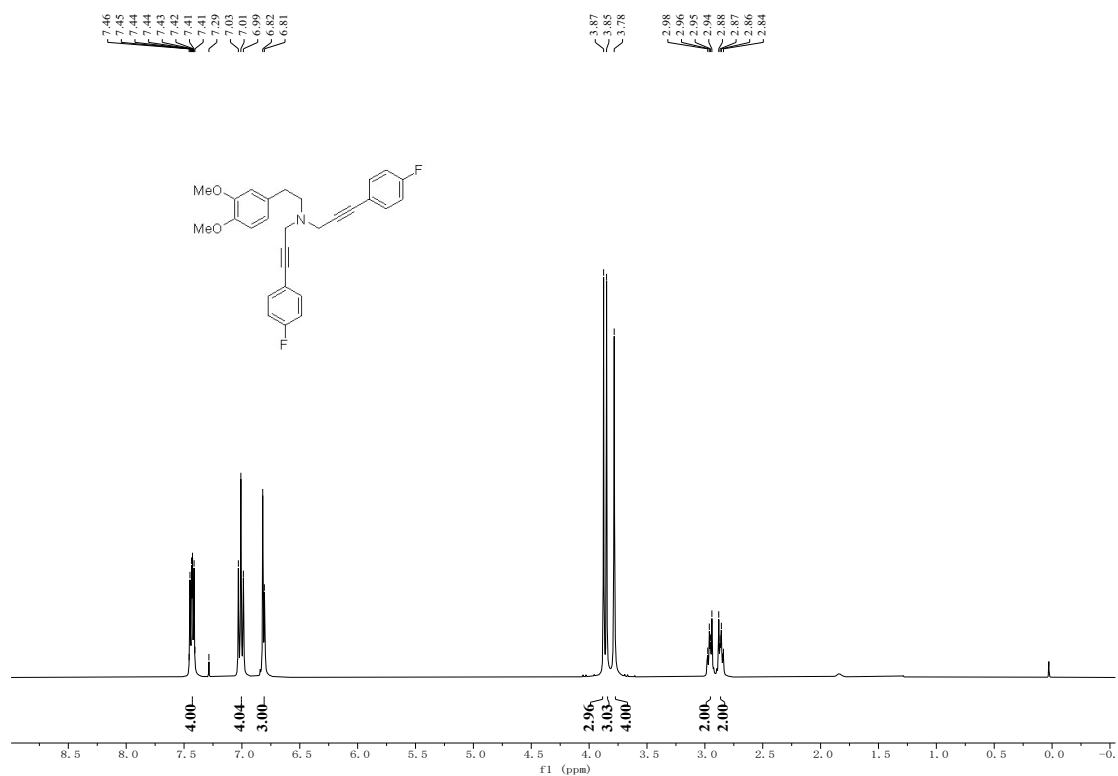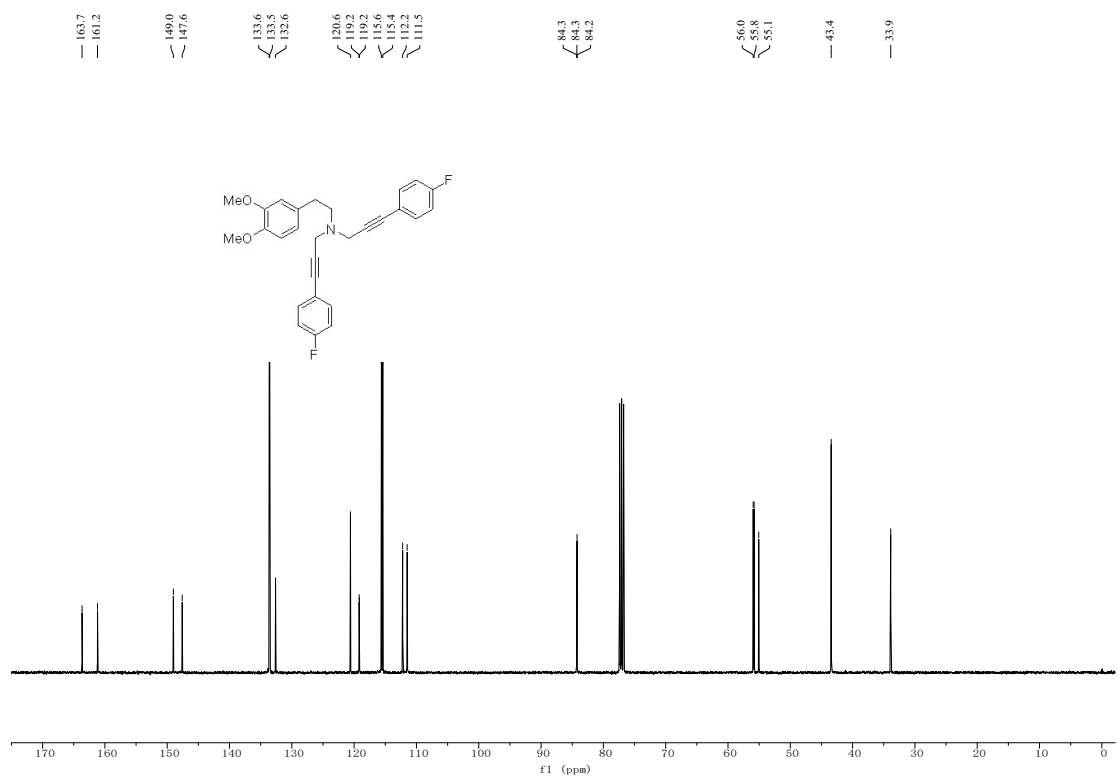

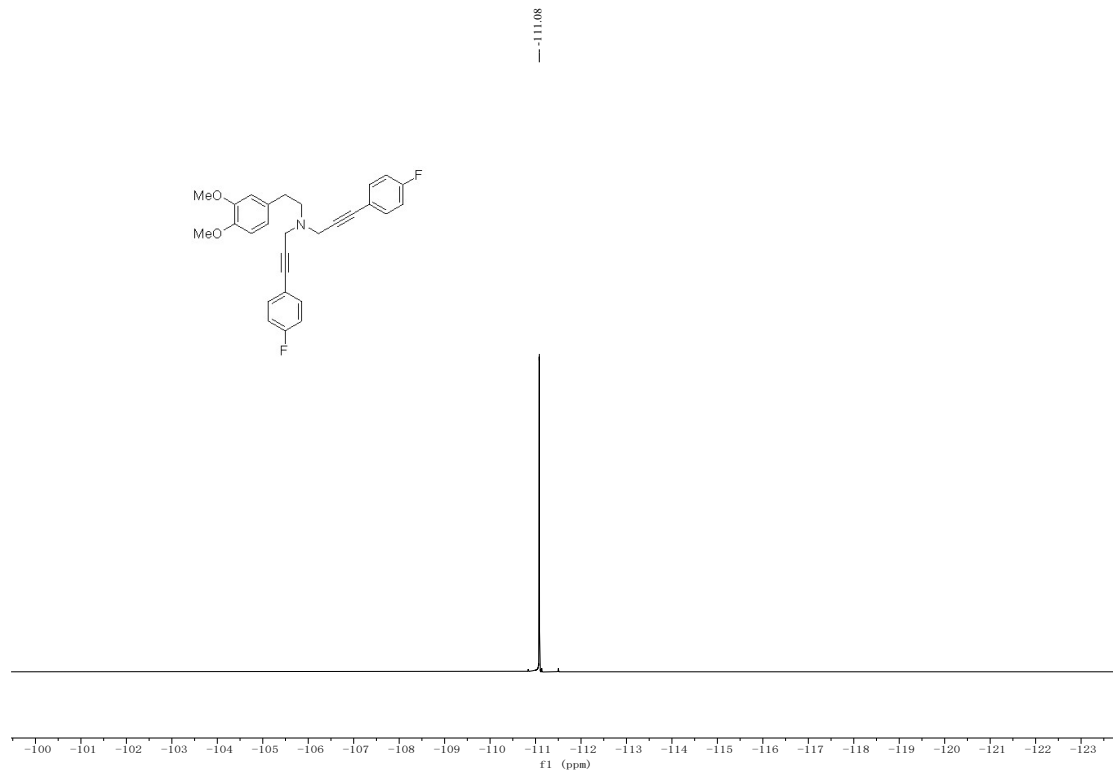

**4-(3-(6,7-dimethoxy-3,4-dihydroisoquinolin-2(1H)-yl)prop-1-yn-1-yl)benzonitrile(5p)**

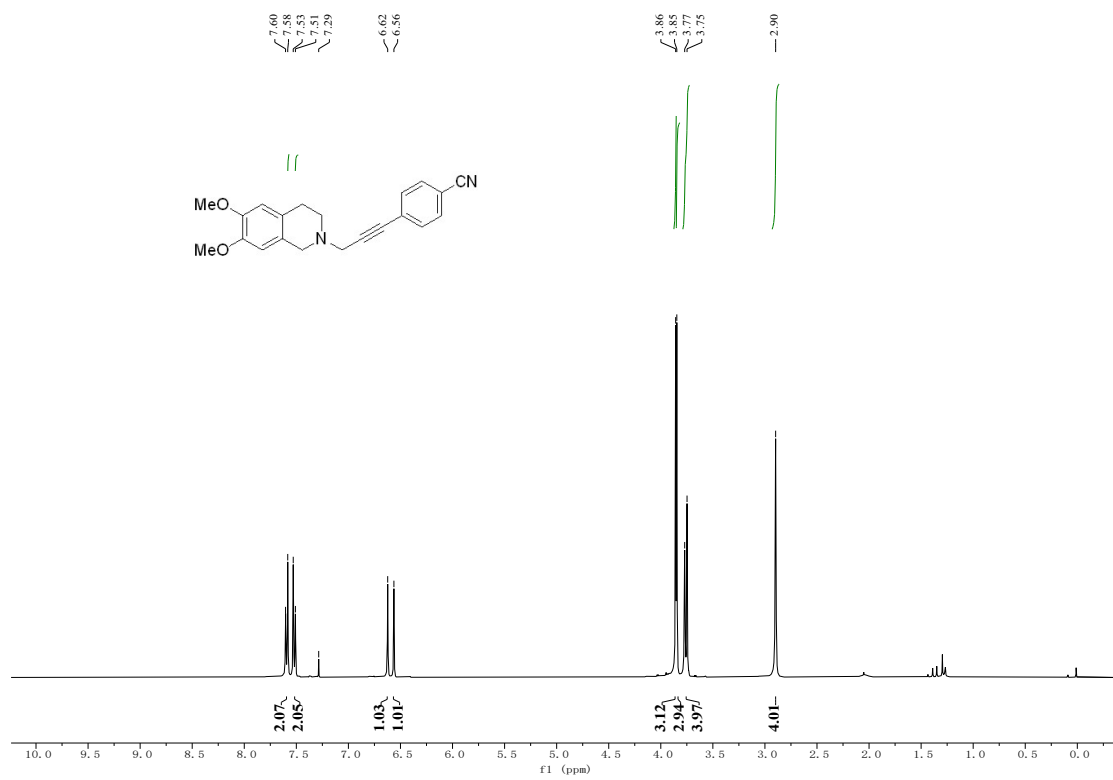

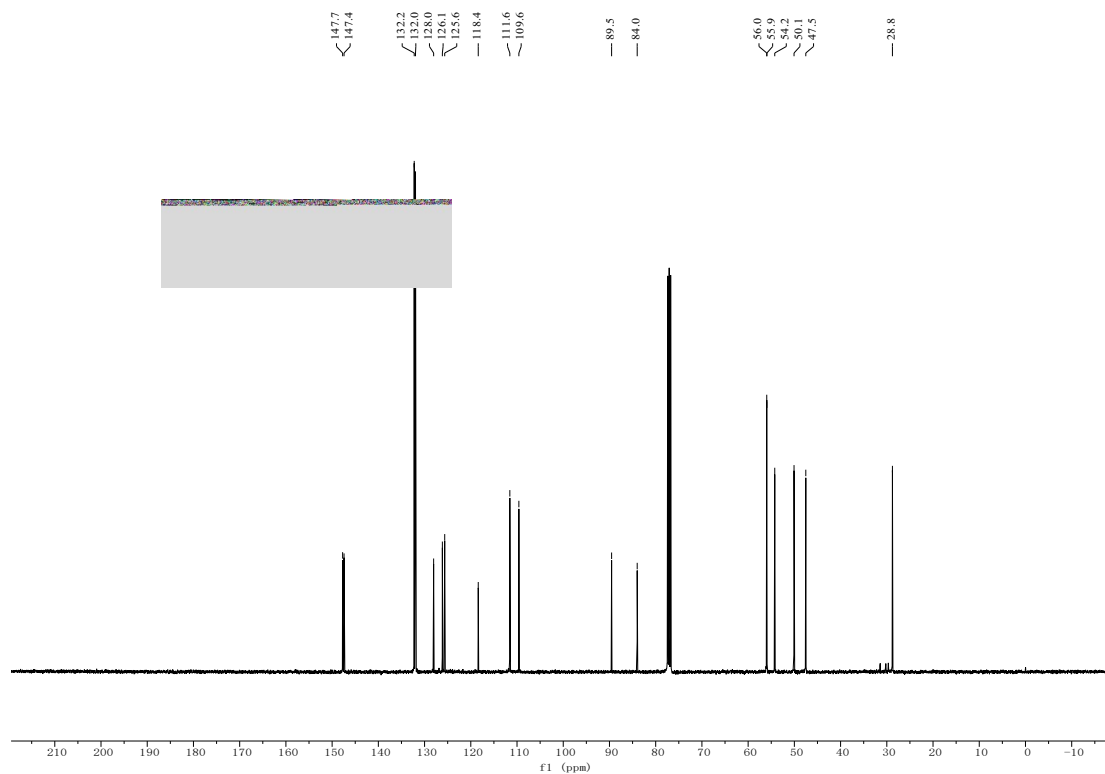

**6,7-dimethoxy-1,2,3,4-tetrahydroisoquinoline(7p)**

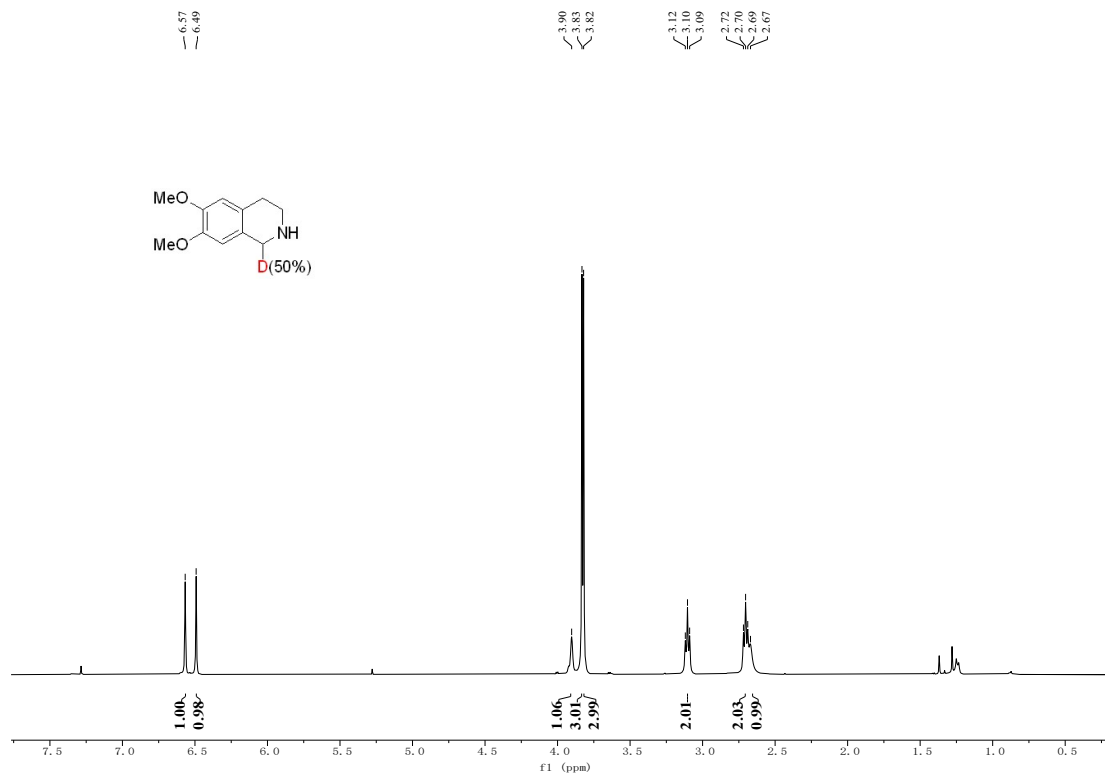

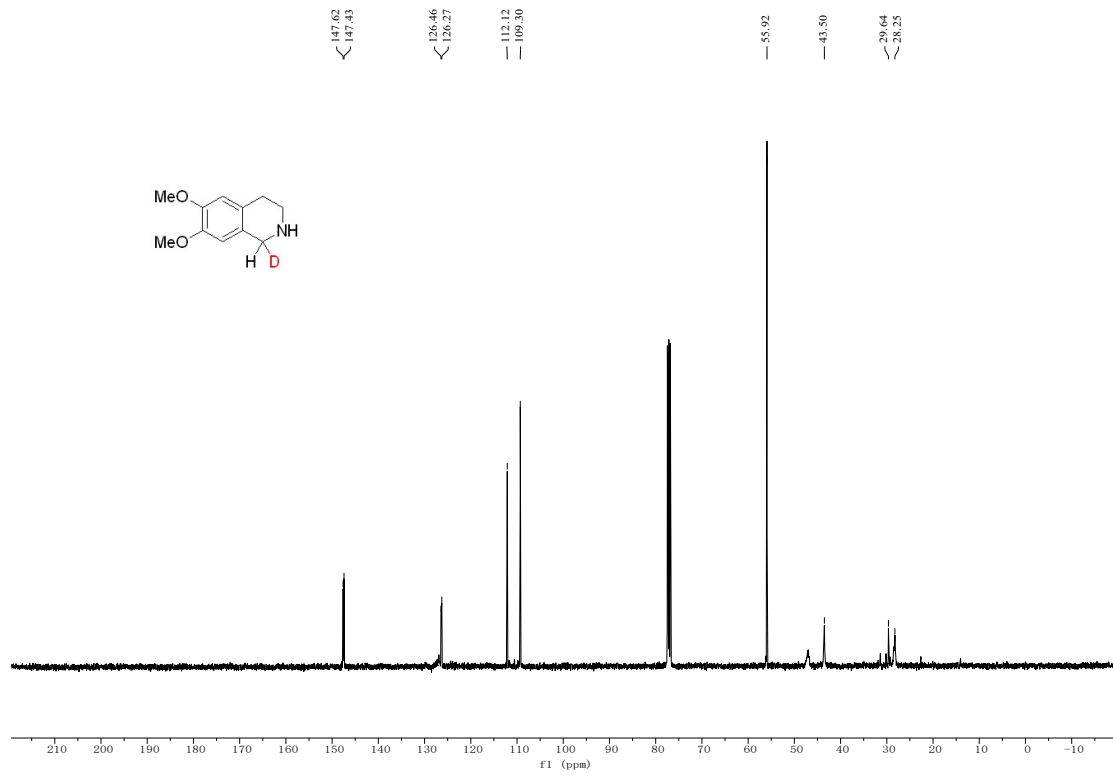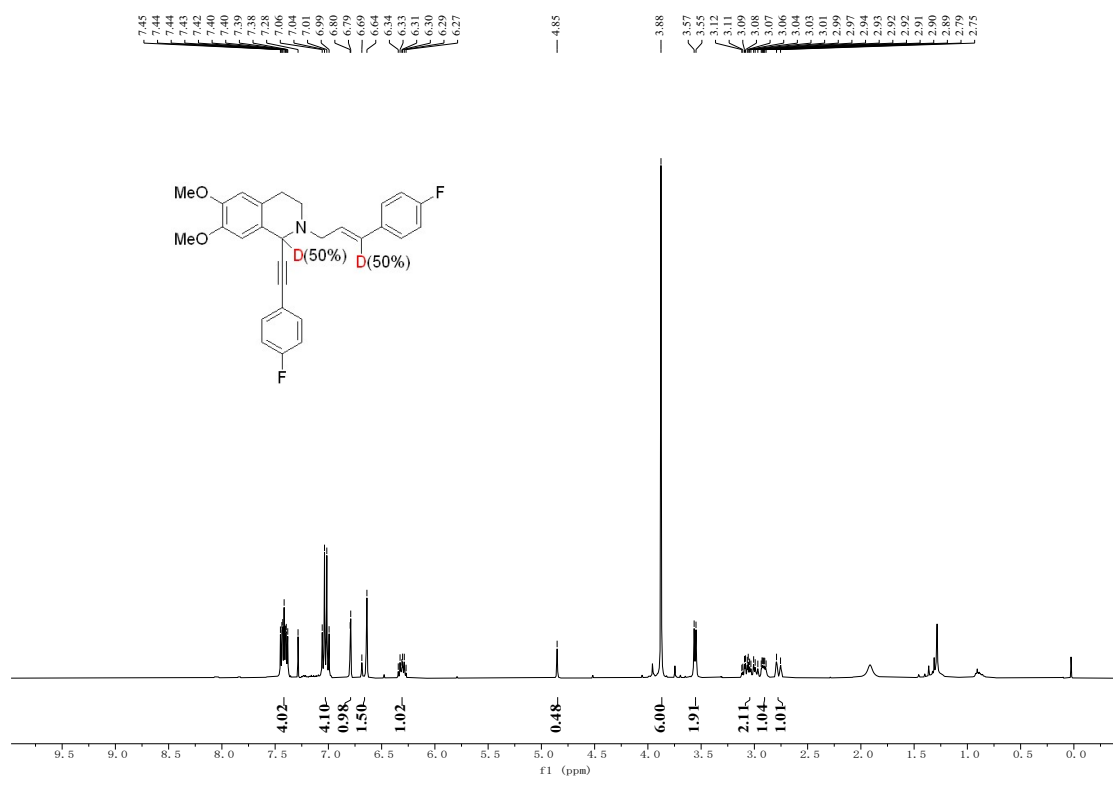



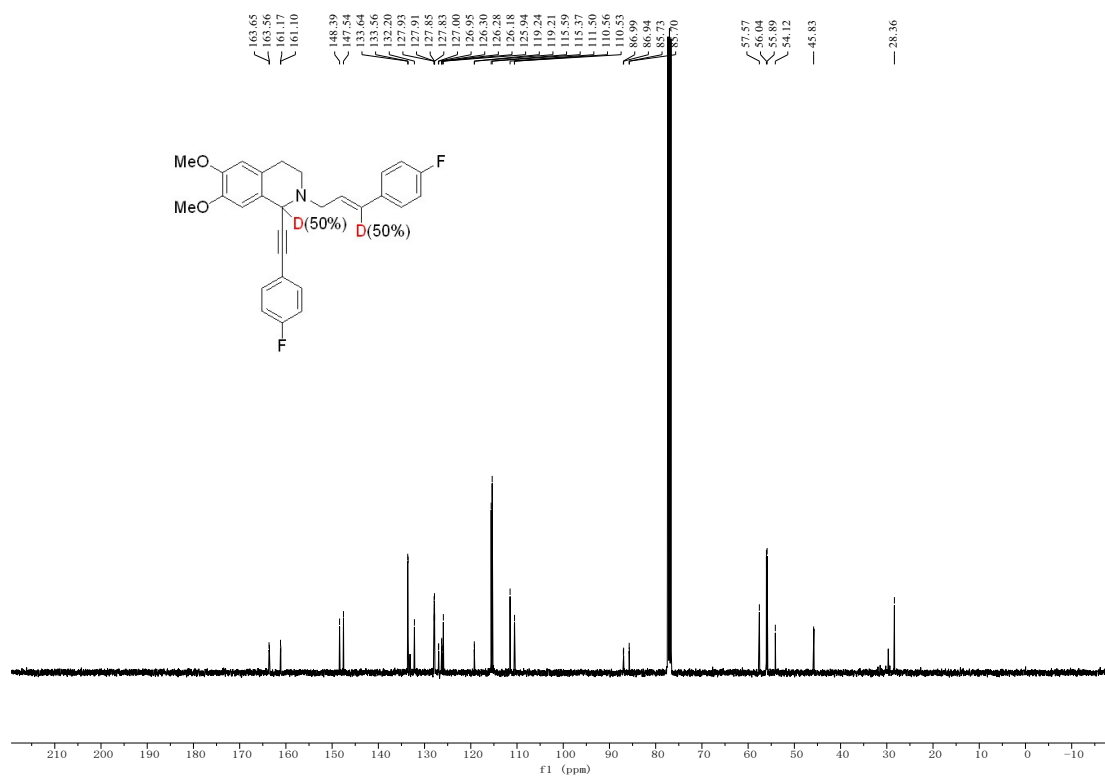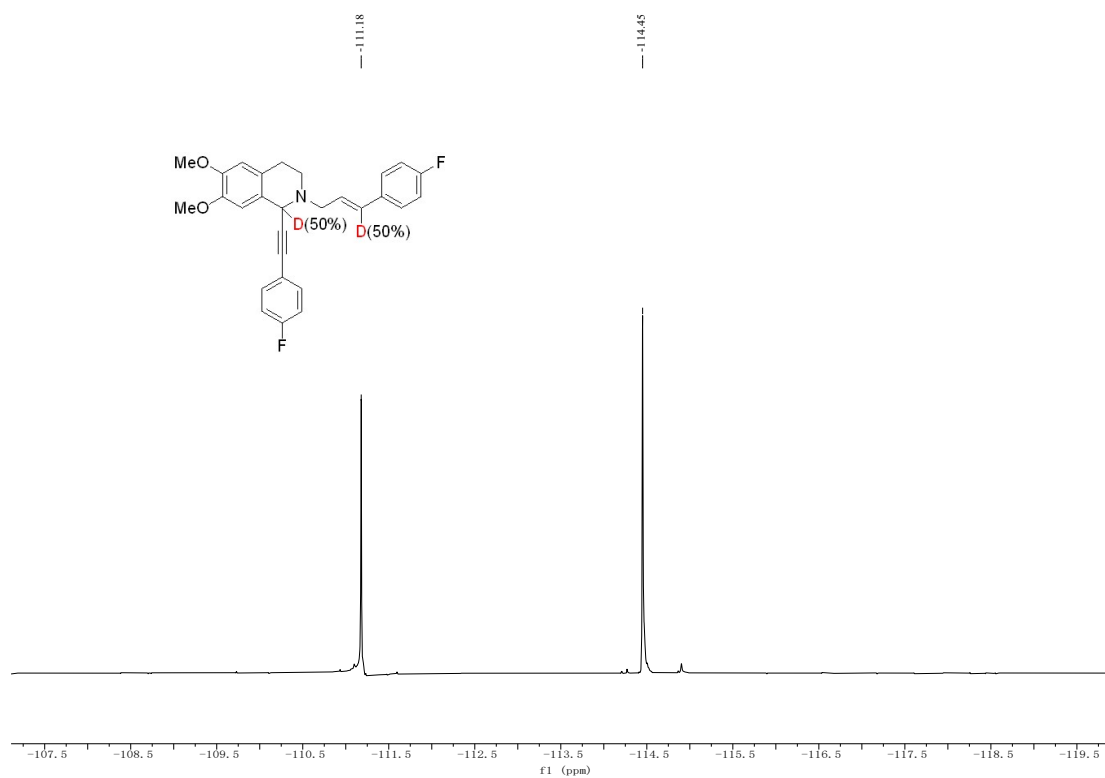

Supplement: d1qo01358k1.pdf [file d1qo01358k1.pdf]
